# Supplementary material
Source: publisher figshare collection journal article supplement (https://sage.figshare.com/ndownloader/files/18725216)
Supplement: Supplementary file 1 [file 18725216]

## Sheet: Downregulated
GroupID	Category	Term	Description	LogP	InTerm_InList	Symbols
1_Summary	KEGG Pathway	mmu03010	Ribosome	-63.9	77/177	Rplp0,Fau,Rpsa,Rpl10a,Rpl19,Rpl21,Rpl22,Rpl26,Rpl27,Rpl28,Rpl29,Rpl30,Rpl32,Rpl37a,Rpl36a,Rpl6,Rpl7,Rpl9,Rps12,Rps14,Rps15,Rps16,Rps17,Rps18,Rps19,Rps24,Rps29,Rps3a1,Rps4x,Rps5,Rps7,Rps8,Rpl13a,Uba52,Rpl27a,Rpl8,Rps3,Rpl7a,Rps11,Rps26,Rps28,Rpl36,Rplp1,Rps27,Rpl35a,Rpl23,Rps23,Rpl15,Rps21,Rpl36al,Mrpl33,Rpl11,Rps10,Rpl14,Rplp2,Rpl39,Rpl37,Rps20,Rpl38,Rpl41,Rpl22l1,Rps13,Rpl34,Rpl18a,Rps9,Rps27a,M…
1_Member	KEGG Pathway	mmu03010	Ribosome	-63.9	77/177	Rplp0,Fau,Rpsa,Rpl10a,Rpl19,Rpl21,Rpl22,Rpl26,Rpl27,Rpl28,Rpl29,Rpl30,Rpl32,Rpl37a,Rpl36a,Rpl6,Rpl7,Rpl9,Rps12,Rps14,Rps15,Rps16,Rps17,Rps18,Rps19,Rps24,Rps29,Rps3a1,Rps4x,Rps5,Rps7,Rps8,Rpl13a,Uba52,Rpl27a,Rpl8,Rps3,Rpl7a,Rps11,Rps26,Rps28,Rpl36,Rplp1,Rps27,Rpl35a,Rpl23,Rps23,Rpl15,Rps21,Rpl36al,Mrpl33,Rpl11,Rps10,Rpl14,Rplp2,Rpl39,Rpl37,Rps20,Rpl38,Rpl41,Rpl22l1,Rps13,Rpl34,Rpl18a,Rps9,Rps27a,M…
1_Member	GO Biological Processes	GO:0006412	translation	-25.9933	83/613	Rplp0,Eef2,Eif4ebp2,Fau,Fech,Rack1,Gspt2,Eif3e,Rpsa,Rara,Rpl10a,Rpl19,Rpl21,Rpl22,Rpl26,Rpl28,Rpl29,Rpl30,Rpl32,Rpl37a,Rpl6,Rpl7,Rpl9,Rps14,Rps15,Rps16,Rps17,Rps18,Rps19,Rps24,Rps29,Rps3a1,Rps4x,Rps5,Rps7,Rps8,Rpl13a,Rpl27a,Rpl8,Rps3,Rps11,Rps26,Rps28,Rpl36,Eif3i,Eef1b2,Rplp1,Rpl35a,Ireb2,Rpl23,Eif3f,Rps23,Rpl15,Rps21,Mrpl33,Rpl11,Rpl14,Rplp2,Rpl39,Rpl37,Rps20,Rpl38,Rpl41,Rpl22l1,Rps13,Eif3h,Mrpl…
1_Member	GO Biological Processes	GO:0043043	peptide biosynthetic process	-24.9349	83/635	Rplp0,Eef2,Eif4ebp2,Fau,Fech,Rack1,Gspt2,Eif3e,Rpsa,Rara,Rpl10a,Rpl19,Rpl21,Rpl22,Rpl26,Rpl28,Rpl29,Rpl30,Rpl32,Rpl37a,Rpl6,Rpl7,Rpl9,Rps14,Rps15,Rps16,Rps17,Rps18,Rps19,Rps24,Rps29,Rps3a1,Rps4x,Rps5,Rps7,Rps8,Rpl13a,Rpl27a,Rpl8,Rps3,Rps11,Rps26,Rps28,Rpl36,Eif3i,Eef1b2,Rplp1,Rpl35a,Ireb2,Rpl23,Eif3f,Rps23,Rpl15,Rps21,Mrpl33,Rpl11,Rpl14,Rplp2,Rpl39,Rpl37,Rps20,Rpl38,Rpl41,Rpl22l1,Rps13,Eif3h,Mrpl…
1_Member	GO Biological Processes	GO:0006518	peptide metabolic process	-24.0259	91/773	Rplp0,Clu,Eef2,Eif4ebp2,Fau,Fech,Rack1,Gpx1,Gspt2,Gstm1,Eif3e,Rpsa,Rara,Rpl10a,Rpl19,Rpl21,Rpl22,Rpl26,Rpl28,Rpl29,Rpl30,Rpl32,Rpl37a,Rpl6,Rpl7,Rpl9,Rps14,Rps15,Rps16,Rps17,Rps18,Rps19,Rps24,Rps29,Rps3a1,Rps4x,Rps5,Rps7,Rps8,Snca,Rpl13a,Rpl27a,Rpl8,Rps3,Rps11,Rps26,Abca7,Rps28,Rpl36,Eif3i,Eef1b2,Rplp1,Mgst1,Rpl35a,Ireb2,Rpl23,Ethe1,Eif3f,Rps23,Rpl15,Rps21,Mrpl33,Rpl11,Rpl14,Rplp2,Rpl39,Rpl37,Rps2…
1_Member	GO Biological Processes	GO:0043604	amide biosynthetic process	-22.5028	86/735	Rplp0,Eef2,Eif4ebp2,Fau,Fech,Rack1,Gspt2,Eif3e,Rpsa,Rara,Rpl10a,Rpl19,Rpl21,Rpl22,Rpl26,Rpl28,Rpl29,Rpl30,Rpl32,Rpl37a,Rpl6,Rpl7,Rpl9,Rps14,Rps15,Rps16,Rps17,Rps18,Rps19,Rps24,Rps29,Rps3a1,Rps4x,Rps5,Rps7,Rps8,St8sia4,Snca,Rpl13a,Rpl27a,Rpl8,Rps3,Rps11,Rps26,Rps28,Rpl36,B3galt4,Eif3i,Eef1b2,Rplp1,Rpl35a,Ireb2,Rpl23,Eif3f,Rps23,Rpl15,Rps21,Mrpl33,Rpl11,Rpl14,Rplp2,Rpl39,Rpl37,Rps20,Rpl38,Rpl41,Rpl…
1_Member	GO Biological Processes	GO:0002181	cytoplasmic translation	-18.854	28/89	Rplp0,Eef2,Gspt2,Rpl10a,Rpl19,Rpl26,Rpl29,Rpl30,Rpl6,Rpl9,Rps29,Rpl13a,Rpl8,Rps26,Rps28,Rpl36,Rplp1,Rpl35a,Rps23,Rpl15,Rps21,Rpl11,Rpl39,Rpl38,Rpl18a,Rpl31,Rpl17,Rpl32l
2_Summary	Reactome Gene Sets	R-MMU-72689	Formation of a pool of free 40S subunits	-29.1885	27/41	Fau,Eif3e,Rps12,Rps14,Rps15,Rps16,Rps18,Rps3a1,Rps4x,Rps5,Rps7,Rps3,Rps11,Rps26,Rps28,Eif3i,Rps27,Eif3f,Rps23,Rps21,Rps10,Rps20,Rps13,Eif3h,Rps9,Rps15a,Rps27rt,Pabpc1,Rpl13a,Eef2,Gspt2,Mrpl33,Mrpl58,Mrpl43,Mrpl30,Imp3,Uba52,Lsm5,Magohb,Sympk,Polr2i,Ppwd1
2_Member	Reactome Gene Sets	R-MMU-72689	Formation of a pool of free 40S subunits	-29.1885	27/41	Fau,Eif3e,Rps12,Rps14,Rps15,Rps16,Rps18,Rps3a1,Rps4x,Rps5,Rps7,Rps3,Rps11,Rps26,Rps28,Eif3i,Rps27,Eif3f,Rps23,Rps21,Rps10,Rps20,Rps13,Eif3h,Rps9,Rps15a,Rps27rt
2_Member	Reactome Gene Sets	R-MMU-72695	Formation of the ternary complex, and subsequently, the 43S complex	-27.942	27/44	Fau,Eif3e,Rps12,Rps14,Rps15,Rps16,Rps18,Rps3a1,Rps4x,Rps5,Rps7,Rps3,Rps11,Rps26,Rps28,Eif3i,Rps27,Eif3f,Rps23,Rps21,Rps10,Rps20,Rps13,Eif3h,Rps9,Rps15a,Rps27rt
2_Member	Reactome Gene Sets	R-MMU-156827	L13a-mediated translational silencing of Ceruloplasmin expression	-27.9332	29/53	Fau,Eif3e,Pabpc1,Rps12,Rps14,Rps15,Rps16,Rps18,Rps3a1,Rps4x,Rps5,Rps7,Rpl13a,Rps3,Rps11,Rps26,Rps28,Eif3i,Rps27,Eif3f,Rps23,Rps21,Rps10,Rps20,Rps13,Eif3h,Rps9,Rps15a,Rps27rt
2_Member	Reactome Gene Sets	R-MMU-72649	Translation initiation complex formation	-26.7218	28/52	Fau,Eif3e,Pabpc1,Rps12,Rps14,Rps15,Rps16,Rps18,Rps3a1,Rps4x,Rps5,Rps7,Rps3,Rps11,Rps26,Rps28,Eif3i,Rps27,Eif3f,Rps23,Rps21,Rps10,Rps20,Rps13,Eif3h,Rps9,Rps15a,Rps27rt
2_Member	Reactome Gene Sets	R-MMU-72662	Activation of the mRNA upon binding of the cap-binding complex and eIFs, and subsequent binding to 4	-26.4098	28/53	Fau,Eif3e,Pabpc1,Rps12,Rps14,Rps15,Rps16,Rps18,Rps3a1,Rps4x,Rps5,Rps7,Rps3,Rps11,Rps26,Rps28,Eif3i,Rps27,Eif3f,Rps23,Rps21,Rps10,Rps20,Rps13,Eif3h,Rps9,Rps15a,Rps27rt
2_Member	Reactome Gene Sets	R-MMU-72613	Eukaryotic Translation Initiation	-25.8666	29/60	Fau,Eif3e,Pabpc1,Rps12,Rps14,Rps15,Rps16,Rps18,Rps3a1,Rps4x,Rps5,Rps7,Rpl13a,Rps3,Rps11,Rps26,Rps28,Eif3i,Rps27,Eif3f,Rps23,Rps21,Rps10,Rps20,Rps13,Eif3h,Rps9,Rps15a,Rps27rt
2_Member	Reactome Gene Sets	R-MMU-72702	Ribosomal scanning and start codon recognition	-25.8309	27/50	Fau,Eif3e,Rps12,Rps14,Rps15,Rps16,Rps18,Rps3a1,Rps4x,Rps5,Rps7,Rps3,Rps11,Rps26,Rps28,Eif3i,Rps27,Eif3f,Rps23,Rps21,Rps10,Rps20,Rps13,Eif3h,Rps9,Rps15a,Rps27rt
2_Member	Reactome Gene Sets	R-MMU-72737	Cap-dependent Translation Initiation	-24.7091	28/59	Fau,Eif3e,Pabpc1,Rps12,Rps14,Rps15,Rps16,Rps18,Rps3a1,Rps4x,Rps5,Rps7,Rps3,Rps11,Rps26,Rps28,Eif3i,Rps27,Eif3f,Rps23,Rps21,Rps10,Rps20,Rps13,Eif3h,Rps9,Rps15a,Rps27rt
2_Member	Reactome Gene Sets	R-MMU-72766	Translation	-18.019	35/157	Eef2,Fau,Gspt2,Eif3e,Pabpc1,Rps12,Rps14,Rps15,Rps16,Rps18,Rps3a1,Rps4x,Rps5,Rps7,Rpl13a,Rps3,Rps11,Rps26,Rps28,Eif3i,Rps27,Eif3f,Rps23,Rps21,Mrpl33,Rps10,Rps20,Rps13,Eif3h,Mrpl58,Rps9,Mrpl43,Mrpl30,Rps15a,Rps27rt
2_Member	Reactome Gene Sets	R-MMU-6791226	Major pathway of rRNA processing in the nucleolus and cytosol	-11.9686	24/114	Fau,Rps12,Rps14,Rps15,Rps16,Rps18,Rps3a1,Rps4x,Rps5,Rps7,Rps3,Rps11,Rps26,Rps28,Rps27,Rps23,Rps21,Rps10,Rps20,Rps13,Rps9,Imp3,Rps15a,Rps27rt
2_Member	Reactome Gene Sets	R-MMU-72312	rRNA processing	-11.9686	24/114	Fau,Rps12,Rps14,Rps15,Rps16,Rps18,Rps3a1,Rps4x,Rps5,Rps7,Rps3,Rps11,Rps26,Rps28,Rps27,Rps23,Rps21,Rps10,Rps20,Rps13,Rps9,Imp3,Rps15a,Rps27rt
2_Member	Reactome Gene Sets	R-MMU-8868773	rRNA processing in the nucleus and cytosol	-11.9686	24/114	Fau,Rps12,Rps14,Rps15,Rps16,Rps18,Rps3a1,Rps4x,Rps5,Rps7,Rps3,Rps11,Rps26,Rps28,Rps27,Rps23,Rps21,Rps10,Rps20,Rps13,Rps9,Imp3,Rps15a,Rps27rt
2_Member	Reactome Gene Sets	R-MMU-8953854	Metabolism of RNA	-3.76139	31/438	Fau,Pabpc1,Rps12,Rps14,Rps15,Rps16,Rps18,Rps3a1,Rps4x,Rps5,Rps7,Uba52,Rps3,Rps11,Rps26,Rps28,Rps27,Lsm5,Magohb,Rps23,Rps21,Rps10,Rps20,Rps13,Sympk,Polr2i,Rps9,Imp3,Ppwd1,Rps15a,Rps27rt
3_Summary	CORUM	CORUM:3047	Parvulin-associated pre-rRNP complex	-13.6866	18/49	Rplp0,Fn1,Rpl19,Rpl21,Rpl26,Rpl6,Rpl7,Rps3a1,Rps4x,Rps8,Rpl13a,Rpl8,Rps3,Rpl7a,Rpl15,Rpl14,Rpl18a,Rpl13
3_Member	CORUM	CORUM:3047	Parvulin-associated pre-rRNP complex	-13.6866	18/49	Rplp0,Fn1,Rpl19,Rpl21,Rpl26,Rpl6,Rpl7,Rps3a1,Rps4x,Rps8,Rpl13a,Rpl8,Rps3,Rpl7a,Rpl15,Rpl14,Rpl18a,Rpl13
4_Summary	KEGG Pathway	mmu05012	Parkinson's disease	-12.9409	28/144	Cox4i1,Cox6c,Cox7c,ATP6,COX1,COX2,COX3,CYTB,ND1,ND2,ND3,ND4,ND5,ND6,Cox7a2l,Snca,Ndufa1,Ube2l6,Ndufb5,Ndufa3,Ndufb3,Uqcrh,Atp5e,Ndufa6,Atp5g2,Ndufb11,Cox6b2,Ndufs6,Capn1,Ppp3cb,Cacna1f,Aph1b,Aph1a,Uqcc3,Etfrf1,Gpx1,Sp1,Polr2i,Adipoq,Insr,Ache,Aldh1a1,Ampd3,Bpgm,Chil3,Clu,Cybb,Gamt,Gnmt,Hba-a1,Hp,Klf2,Mmp8,Pfkm,Prdx2,Tpmt,Pgam2,Cyp2d22,Sqor,Ireb2,Ethe1,Lipt2,Chil4,Hbq1a,Cyp2ab1,Mpst,Hbq1b,Hbb-bt,M…
4_Member	KEGG Pathway	mmu05012	Parkinson's disease	-12.9409	28/144	Cox4i1,Cox6c,Cox7c,ATP6,COX1,COX2,COX3,CYTB,ND1,ND2,ND3,ND4,ND5,ND6,Cox7a2l,Snca,Ndufa1,Ube2l6,Ndufb5,Ndufa3,Ndufb3,Uqcrh,Atp5e,Ndufa6,Atp5g2,Ndufb11,Cox6b2,Ndufs6
4_Member	KEGG Pathway	mmu00190	Oxidative phosphorylation	-12.0388	26/134	Cox4i1,Cox6c,Cox7c,ATP6,COX1,COX2,COX3,CYTB,ND1,ND2,ND3,ND4,ND5,ND6,Cox7a2l,Ndufa1,Ndufb5,Ndufa3,Ndufb3,Uqcrh,Atp5e,Ndufa6,Atp5g2,Ndufb11,Cox6b2,Ndufs6
4_Member	KEGG Pathway	mmu05010	Alzheimer's disease	-9.33331	26/175	Capn1,Cox4i1,Cox6c,Cox7c,ATP6,COX1,COX2,COX3,CYTB,Ppp3cb,Cox7a2l,Snca,Ndufa1,Cacna1f,Ndufb5,Ndufa3,Ndufb3,Uqcrh,Atp5e,Ndufa6,Atp5g2,Ndufb11,Aph1b,Aph1a,Cox6b2,Ndufs6
4_Member	GO Biological Processes	GO:0042773	ATP synthesis coupled electron transport	-6.92653	13/60	Cox4i1,Cox7c,COX1,COX2,COX3,CYTB,ND2,ND4,ND5,Snca,Uqcrh,Uqcc3,Ndufs6
4_Member	GO Biological Processes	GO:0022900	electron transport chain	-6.64317	15/85	Cox4i1,Cox7c,COX1,COX2,COX3,CYTB,ND2,ND4,ND5,Snca,Ndufb3,Uqcrh,Etfrf1,Uqcc3,Ndufs6
4_Member	KEGG Pathway	mmu05016	Huntington's disease	-6.47794	23/194	Cox4i1,Cox6c,Cox7c,Gpx1,ATP6,COX1,COX2,COX3,CYTB,Cox7a2l,Sp1,Ndufa1,Ndufb5,Ndufa3,Ndufb3,Uqcrh,Atp5e,Ndufa6,Atp5g2,Polr2i,Ndufb11,Cox6b2,Ndufs6
4_Member	GO Biological Processes	GO:0022904	respiratory electron transport chain	-6.19499	14/80	Cox4i1,Cox7c,COX1,COX2,COX3,CYTB,ND2,ND4,ND5,Snca,Uqcrh,Etfrf1,Uqcc3,Ndufs6
4_Member	KEGG Pathway	mmu04932	Non-alcoholic fatty liver disease (NAFLD)	-5.85146	19/151	Adipoq,Cox4i1,Cox6c,Cox7c,Insr,COX1,COX2,COX3,CYTB,Cox7a2l,Ndufa1,Ndufb5,Ndufa3,Ndufb3,Uqcrh,Ndufa6,Ndufb11,Cox6b2,Ndufs6
4_Member	GO Biological Processes	GO:0042775	mitochondrial ATP synthesis coupled electron transport	-5.50488	11/56	Cox4i1,Cox7c,COX1,COX3,CYTB,ND2,ND4,Snca,Uqcrh,Uqcc3,Ndufs6
4_Member	GO Biological Processes	GO:0006119	oxidative phosphorylation	-5.44108	14/92	Cox4i1,Cox7c,COX1,COX2,COX3,CYTB,ND2,ND4,ND5,Cox7a2l,Snca,Uqcrh,Uqcc3,Ndufs6
4_Member	GO Biological Processes	GO:0017144	drug metabolic process	-4.9254	48/713	Ache,Aldh1a1,Ampd3,Bpgm,Chil3,Clu,Cox4i1,Cox7c,Cybb,Gamt,Gnmt,Gpx1,Hba-a1,Hp,Insr,Klf2,Mmp8,ATP6,COX1,COX2,COX3,CYTB,ND2,ND4,ND5,Pfkm,Cox7a2l,Snca,Sp1,Prdx2,Tpmt,Pgam2,Cyp2d22,Sqor,Ireb2,Ethe1,Uqcrh,Atp5e,Lipt2,Atp5g2,Chil4,Uqcc3,Hbq1a,Cyp2ab1,Mpst,Ndufs6,Hbq1b,Hbb-bt
4_Member	GO Biological Processes	GO:0046034	ATP metabolic process	-4.60493	22/233	Ampd3,Bpgm,Cox4i1,Cox7c,Insr,ATP6,COX1,COX2,COX3,CYTB,ND2,ND4,ND5,Pfkm,Cox7a2l,Snca,Pgam2,Uqcrh,Atp5e,Atp5g2,Uqcc3,Ndufs6
4_Member	GO Biological Processes	GO:0009205	purine ribonucleoside triphosphate metabolic process	-4.39023	23/258	Ampd3,Bpgm,Cox4i1,Cox7c,Insr,ATP6,COX1,COX2,COX3,CYTB,ND2,ND4,ND5,Pfkm,Cox7a2l,Snca,Pgam2,Mocs1,Uqcrh,Atp5e,Atp5g2,Uqcc3,Ndufs6
4_Member	GO Biological Processes	GO:0045333	cellular respiration	-4.36396	17/159	Cox4i1,Cox7c,COX1,COX2,COX3,CYTB,ND1,ND2,ND4,ND5,Snca,Cisd1,Ireb2,Uqcrh,Etfrf1,Uqcc3,Ndufs6
4_Member	GO Biological Processes	GO:0009199	ribonucleoside triphosphate metabolic process	-4.28646	23/262	Ampd3,Bpgm,Cox4i1,Cox7c,Insr,ATP6,COX1,COX2,COX3,CYTB,ND2,ND4,ND5,Pfkm,Cox7a2l,Snca,Pgam2,Mocs1,Uqcrh,Atp5e,Atp5g2,Uqcc3,Ndufs6
4_Member	GO Biological Processes	GO:0009144	purine nucleoside triphosphate metabolic process	-4.16029	23/267	Ampd3,Bpgm,Cox4i1,Cox7c,Insr,ATP6,COX1,COX2,COX3,CYTB,ND2,ND4,ND5,Pfkm,Cox7a2l,Snca,Pgam2,Mocs1,Uqcrh,Atp5e,Atp5g2,Uqcc3,Ndufs6
4_Member	KEGG Pathway	mmu04260	Cardiac muscle contraction	-4.08962	11/78	Cox4i1,Cox6c,Cox7c,COX1,COX2,COX3,CYTB,Cox7a2l,Cacna1f,Uqcrh,Cox6b2
4_Member	GO Biological Processes	GO:0009167	purine ribonucleoside monophosphate metabolic process	-3.94131	22/258	Ampd3,Bpgm,Cox4i1,Cox7c,Insr,ATP6,COX1,COX2,COX3,CYTB,ND2,ND4,ND5,Pfkm,Cox7a2l,Snca,Pgam2,Uqcrh,Atp5e,Atp5g2,Uqcc3,Ndufs6
4_Member	GO Biological Processes	GO:0009126	purine nucleoside monophosphate metabolic process	-3.91693	22/259	Ampd3,Bpgm,Cox4i1,Cox7c,Insr,ATP6,COX1,COX2,COX3,CYTB,ND2,ND4,ND5,Pfkm,Cox7a2l,Snca,Pgam2,Uqcrh,Atp5e,Atp5g2,Uqcc3,Ndufs6
4_Member	GO Biological Processes	GO:0009161	ribonucleoside monophosphate metabolic process	-3.84469	22/262	Ampd3,Bpgm,Cox4i1,Cox7c,Insr,ATP6,COX1,COX2,COX3,CYTB,ND2,ND4,ND5,Pfkm,Cox7a2l,Snca,Pgam2,Uqcrh,Atp5e,Atp5g2,Uqcc3,Ndufs6
4_Member	GO Biological Processes	GO:0009141	nucleoside triphosphate metabolic process	-3.75881	23/284	Ampd3,Bpgm,Cox4i1,Cox7c,Insr,ATP6,COX1,COX2,COX3,CYTB,ND2,ND4,ND5,Pfkm,Cox7a2l,Snca,Pgam2,Mocs1,Uqcrh,Atp5e,Atp5g2,Uqcc3,Ndufs6
4_Member	GO Biological Processes	GO:0015980	energy derivation by oxidation of organic compounds	-3.72321	21/249	Cox4i1,Cox7c,Gnmt,Insr,COX1,COX2,COX3,CYTB,ND1,ND2,ND4,ND5,Pfkm,Snca,Gyg,Cisd1,Ireb2,Uqcrh,Etfrf1,Uqcc3,Ndufs6
4_Member	GO Biological Processes	GO:0009123	nucleoside monophosphate metabolic process	-3.59112	22/273	Ampd3,Bpgm,Cox4i1,Cox7c,Insr,ATP6,COX1,COX2,COX3,CYTB,ND2,ND4,ND5,Pfkm,Cox7a2l,Snca,Pgam2,Uqcrh,Atp5e,Atp5g2,Uqcc3,Ndufs6
4_Member	GO Biological Processes	GO:0072521	purine-containing compound metabolic process	-3.46457	32/476	Ampd3,Bpgm,Cox4i1,Cox7c,Gamt,Gda,Gnmt,Guca1a,Hint1,Insr,ATP6,COX1,COX2,COX3,CYTB,ND2,ND4,ND5,Pfkm,Cox7a2l,Snca,Gucy1b1,Pgam2,Mocs1,Uqcrh,Atp5e,Atp5g2,Oxsm,Mcee,Uqcc3,Macrod1,Ndufs6
4_Member	GO Biological Processes	GO:0006091	generation of precursor metabolites and energy	-3.36325	26/361	Bpgm,Cox4i1,Cox7c,Gnmt,Insr,COX1,COX2,COX3,CYTB,ND1,ND2,ND4,ND5,Pfkm,Cox7a2l,Snca,Gyg,Cisd1,Pgam2,Ireb2,Ndufb3,Uqcrh,Etfrf1,Uqcc3,Etfbkmt,Ndufs6
4_Member	CORUM	CORUM:538	Cytochrome c oxidase, mitochondrial	-3.23238	4/12	Cox4i1,Cox6c,Cox7c,COX2
4_Member	GO Biological Processes	GO:0006123	mitochondrial electron transport, cytochrome c to oxygen	-3.23238	4/12	Cox4i1,Cox7c,COX1,COX3
4_Member	GO Biological Processes	GO:0019646	aerobic electron transport chain	-3.23238	4/12	Cox4i1,Cox7c,COX1,COX3
4_Member	GO Biological Processes	GO:0019693	ribose phosphate metabolic process	-3.13683	29/435	Ampd3,Bpgm,Cox4i1,Cox7c,Hint1,Insr,ATP6,COX1,COX2,COX3,CYTB,ND2,ND4,ND5,Pfkm,Rpia,Cox7a2l,Snca,Gucy1b1,Pgam2,Mocs1,Uqcrh,Atp5e,Atp5g2,Oxsm,Mcee,Uqcc3,Pgd,Ndufs6
4_Member	GO Biological Processes	GO:0009150	purine ribonucleotide metabolic process	-2.91332	27/408	Ampd3,Bpgm,Cox4i1,Cox7c,Hint1,Insr,ATP6,COX1,COX2,COX3,CYTB,ND2,ND4,ND5,Pfkm,Cox7a2l,Snca,Gucy1b1,Pgam2,Mocs1,Uqcrh,Atp5e,Atp5g2,Oxsm,Mcee,Uqcc3,Ndufs6
4_Member	GO Biological Processes	GO:0006163	purine nucleotide metabolic process	-2.85026	28/433	Ampd3,Bpgm,Cox4i1,Cox7c,Guca1a,Hint1,Insr,ATP6,COX1,COX2,COX3,CYTB,ND2,ND4,ND5,Pfkm,Cox7a2l,Snca,Gucy1b1,Pgam2,Mocs1,Uqcrh,Atp5e,Atp5g2,Oxsm,Mcee,Uqcc3,Ndufs6
4_Member	GO Biological Processes	GO:0009259	ribonucleotide metabolic process	-2.76188	27/418	Ampd3,Bpgm,Cox4i1,Cox7c,Hint1,Insr,ATP6,COX1,COX2,COX3,CYTB,ND2,ND4,ND5,Pfkm,Cox7a2l,Snca,Gucy1b1,Pgam2,Mocs1,Uqcrh,Atp5e,Atp5g2,Oxsm,Mcee,Uqcc3,Ndufs6
4_Member	GO Biological Processes	GO:0055086	nucleobase-containing small molecule metabolic process	-2.71642	36/616	Ampd3,Bpgm,Cox4i1,Cox7c,Gamt,Gda,Gnmt,Guca1a,Hint1,Insr,Kcnab2,ATP6,COX1,COX2,COX3,CYTB,ND2,ND4,ND5,Pfkm,Rpia,Cox7a2l,Snca,Gucy1b1,Pgam2,Mocs1,Uqcrh,Atp5e,Atp5g2,Oxsm,Mcee,Uqcc3,Macrod1,Pgd,Csgalnact1,Ndufs6
4_Member	GO Biological Processes	GO:0009060	aerobic respiration	-2.44682	8/72	Cox4i1,Cox7c,COX1,COX3,ND1,ND4,Ireb2,Uqcrh
4_Member	GO Biological Processes	GO:0009117	nucleotide metabolic process	-2.28152	31/542	Ampd3,Bpgm,Cox4i1,Cox7c,Guca1a,Hint1,Insr,Kcnab2,ATP6,COX1,COX2,COX3,CYTB,ND2,ND4,ND5,Pfkm,Rpia,Cox7a2l,Snca,Gucy1b1,Pgam2,Mocs1,Uqcrh,Atp5e,Atp5g2,Oxsm,Mcee,Uqcc3,Pgd,Ndufs6
4_Member	GO Biological Processes	GO:0006753	nucleoside phosphate metabolic process	-2.18115	31/551	Ampd3,Bpgm,Cox4i1,Cox7c,Guca1a,Hint1,Insr,Kcnab2,ATP6,COX1,COX2,COX3,CYTB,ND2,ND4,ND5,Pfkm,Rpia,Cox7a2l,Snca,Gucy1b1,Pgam2,Mocs1,Uqcrh,Atp5e,Atp5g2,Oxsm,Mcee,Uqcc3,Pgd,Ndufs6
5_Summary	GO Biological Processes	GO:0042254	ribosome biogenesis	-8.91503	33/281	Rplp0,Rpsa,Npm3,Rpl10a,Rpl26,Rpl27,Rpl6,Rpl7,Rps14,Rps15,Rps16,Rps17,Rps19,Rps24,Rps5,Rps7,Rps8,Rpl7a,Rps28,Rps27,Isg20,Rpl35a,Rps21,Rpl11,Rps10,Rpl14,Rpl38,Riox1,Imp3,Rpl10,Eif2a,Naf1,Rpl23a,Dync1h1,Snrpe,Rpl13a,Rps23,Ago1,Slfn14,Rtraf,Urm1,Trmt12,Ctu1,Dyrk3,Lars2
5_Member	GO Biological Processes	GO:0042254	ribosome biogenesis	-8.91503	33/281	Rplp0,Rpsa,Npm3,Rpl10a,Rpl26,Rpl27,Rpl6,Rpl7,Rps14,Rps15,Rps16,Rps17,Rps19,Rps24,Rps5,Rps7,Rps8,Rpl7a,Rps28,Rps27,Isg20,Rpl35a,Rps21,Rpl11,Rps10,Rpl14,Rpl38,Riox1,Imp3,Rpl10,Eif2a,Naf1,Rpl23a
5_Member	GO Biological Processes	GO:0042274	ribosomal small subunit biogenesis	-8.2996	15/65	Rpsa,Rps14,Rps15,Rps16,Rps17,Rps19,Rps24,Rps5,Rps7,Rps8,Rps28,Rps27,Rps21,Rps10,Rpl38
5_Member	GO Biological Processes	GO:0000028	ribosomal small subunit assembly	-7.82552	9/21	Rpsa,Rps14,Rps15,Rps19,Rps5,Rps28,Rps27,Rps10,Rpl38
5_Member	GO Biological Processes	GO:0042255	ribosome assembly	-7.65227	15/72	Rplp0,Rpsa,Rpl6,Rps14,Rps15,Rps19,Rps5,Rps28,Rps27,Rpl11,Rps10,Rpl38,Rpl10,Eif2a,Rpl23a
5_Member	GO Biological Processes	GO:0022613	ribonucleoprotein complex biogenesis	-6.88841	38/425	Rplp0,Dync1h1,Rpsa,Npm3,Rpl10a,Rpl26,Rpl27,Rpl6,Rpl7,Rps14,Rps15,Rps16,Rps17,Rps19,Rps24,Rps5,Rps7,Rps8,Snrpe,Rpl13a,Rpl7a,Rps28,Rps27,Isg20,Rpl35a,Rps23,Rps21,Rpl11,Rps10,Rpl14,Rpl38,Riox1,Imp3,Rpl10,Eif2a,Naf1,Ago1,Rpl23a
5_Member	GO Biological Processes	GO:0006364	rRNA processing	-6.68373	23/189	Rpsa,Npm3,Rpl10a,Rpl26,Rpl27,Rpl7,Rps14,Rps15,Rps16,Rps17,Rps19,Rps24,Rps7,Rps8,Rpl7a,Rps28,Isg20,Rpl35a,Rps21,Rpl11,Rpl14,Imp3,Naf1
5_Member	GO Biological Processes	GO:0016072	rRNA metabolic process	-6.06431	24/220	Rpsa,Npm3,Rpl10a,Rpl26,Rpl27,Rpl7,Rps14,Rps15,Rps16,Rps17,Rps19,Rps24,Rps7,Rps8,Rpl7a,Rps28,Isg20,Rpl35a,Rps21,Rpl11,Rpl14,Imp3,Naf1,Slfn14
5_Member	GO Biological Processes	GO:0034470	ncRNA processing	-4.59822	28/339	Rpsa,Npm3,Rpl10a,Rpl26,Rpl27,Rpl7,Rps14,Rps15,Rps16,Rps17,Rps19,Rps24,Rps7,Rps8,Rpl7a,Rps28,Isg20,Rpl35a,Rps21,Rpl11,Rpl14,Rtraf,Urm1,Trmt12,Imp3,Ctu1,Naf1,Ago1
5_Member	GO Biological Processes	GO:0071826	ribonucleoprotein complex subunit organization	-4.51944	22/236	Rplp0,Dync1h1,Rpsa,Rpl6,Rps14,Rps15,Rps19,Rps5,Snrpe,Rpl13a,Rps28,Rps27,Rps23,Rpl11,Rps10,Rpl38,Rpl10,Dyrk3,Eif2a,Naf1,Ago1,Rpl23a
5_Member	GO Biological Processes	GO:0022618	ribonucleoprotein complex assembly	-4.40643	21/223	Rplp0,Dync1h1,Rpsa,Rpl6,Rps14,Rps15,Rps19,Rps5,Snrpe,Rpl13a,Rps28,Rps27,Rps23,Rpl11,Rps10,Rpl38,Rpl10,Eif2a,Naf1,Ago1,Rpl23a
5_Member	GO Biological Processes	GO:0030490	maturation of SSU-rRNA	-3.17633	7/43	Rpsa,Rps14,Rps16,Rps19,Rps8,Rps28,Rps21
5_Member	GO Biological Processes	GO:0000462	maturation of SSU-rRNA from tricistronic rRNA transcript (SSU-rRNA, 5.8S rRNA, LSU-rRNA)	-3.12837	6/32	Rpsa,Rps14,Rps16,Rps19,Rps8,Rps21
5_Member	GO Biological Processes	GO:0034660	ncRNA metabolic process	-3.07157	30/460	Rpsa,Npm3,Rpl10a,Rpl26,Rpl27,Rpl7,Rps14,Rps15,Rps16,Rps17,Rps19,Rps24,Rps7,Rps8,Rpl7a,Rps28,Isg20,Rpl35a,Rps21,Rpl11,Rpl14,Rtraf,Urm1,Trmt12,Lars2,Imp3,Ctu1,Naf1,Ago1,Slfn14
6_Summary	GO Biological Processes	GO:0034101	erythrocyte homeostasis	-8.40046	22/141	Acvr1b,Alas2,Ampd3,Bcl6,Bpgm,Epb42,Fech,Hba-a1,Klf2,Trim10,Rps14,Rps17,Rps19,Rps24,Sp1,Thra,Ireb2,Gas2l1,Mpig6b,Hba-a2,Dyrk3,Flvcr1,Bak1,Mpl,Adipoq,Car2,Il3ra,Irf4,Itgb3,Rara,Rarg,Rabgap1l,Clec1b,Prxl2a,Tspan2,Il23a,Clec2i,Hist2h4,Wasf2,Hist1h4c,Hist1h4i,Hist1h4m,Ppp3cb,Spta1,Prdx2,Tnfsf13b,Cacna1f
6_Member	GO Biological Processes	GO:0034101	erythrocyte homeostasis	-8.40046	22/141	Acvr1b,Alas2,Ampd3,Bcl6,Bpgm,Epb42,Fech,Hba-a1,Klf2,Trim10,Rps14,Rps17,Rps19,Rps24,Sp1,Thra,Ireb2,Gas2l1,Mpig6b,Hba-a2,Dyrk3,Flvcr1
6_Member	GO Biological Processes	GO:0002262	myeloid cell homeostasis	-7.95954	24/175	Acvr1b,Alas2,Ampd3,Bak1,Bcl6,Bpgm,Epb42,Fech,Hba-a1,Klf2,Mpl,Trim10,Rps14,Rps17,Rps19,Rps24,Sp1,Thra,Ireb2,Gas2l1,Mpig6b,Hba-a2,Dyrk3,Flvcr1
6_Member	GO Biological Processes	GO:0030099	myeloid cell differentiation	-7.63625	38/398	Adipoq,Acvr1b,Alas2,Bcl6,Bpgm,Car2,Epb42,Fech,Hba-a1,Il3ra,Irf4,Itgb3,Klf2,Mpl,Rara,Rarg,Trim10,Rps14,Rps19,Sp1,Thra,Rabgap1l,Clec1b,Ireb2,Prxl2a,Tspan2,Gas2l1,Il23a,Clec2i,Hist2h4,Mpig6b,Hba-a2,Dyrk3,Flvcr1,Wasf2,Hist1h4c,Hist1h4i,Hist1h4m
6_Member	GO Biological Processes	GO:0030218	erythrocyte differentiation	-6.19069	18/130	Acvr1b,Alas2,Bcl6,Bpgm,Epb42,Fech,Hba-a1,Klf2,Trim10,Rps14,Rps19,Sp1,Thra,Gas2l1,Mpig6b,Hba-a2,Dyrk3,Flvcr1
6_Member	GO Biological Processes	GO:0048872	homeostasis of number of cells	-5.65234	29/315	Acvr1b,Alas2,Ampd3,Bak1,Bcl6,Bpgm,Epb42,Fech,Hba-a1,Klf2,Mpl,Ppp3cb,Trim10,Rps14,Rps17,Rps19,Rps24,Sp1,Spta1,Prdx2,Thra,Tnfsf13b,Cacna1f,Ireb2,Gas2l1,Mpig6b,Hba-a2,Dyrk3,Flvcr1
6_Member	GO Biological Processes	GO:0061515	myeloid cell development	-4.14192	11/77	Bcl6,Bpgm,Epb42,Hba-a1,Klf2,Rabgap1l,Tspan2,Mpig6b,Hba-a2,Flvcr1,Wasf2
6_Member	GO Biological Processes	GO:0048821	erythrocyte development	-3.44499	7/39	Bcl6,Bpgm,Epb42,Hba-a1,Klf2,Hba-a2,Flvcr1
7_Summary	Reactome Gene Sets	R-MMU-163200	Respiratory electron transport, ATP synthesis by chemiosmotic coupling, and heat production by uncou	-7.45661	16/85	ATP6,ND1,ND2,ND3,ND4,ND5,ND6,Ndufa1,Ndufb5,Ndufa3,Ndufb3,Atp5e,Ndufa6,Atp5g2,Ndufb11,Ndufs6,Smim20,Coa4,Uqcc3
7_Member	Reactome Gene Sets	R-MMU-163200	Respiratory electron transport, ATP synthesis by chemiosmotic coupling, and heat production by uncou	-7.45661	16/85	ATP6,ND1,ND2,ND3,ND4,ND5,ND6,Ndufa1,Ndufb5,Ndufa3,Ndufb3,Atp5e,Ndufa6,Atp5g2,Ndufb11,Ndufs6
7_Member	CORUM	CORUM:382	Respiratory chain complex I, mitochondrial	-7.09263	11/40	ND1,ND3,ND4,ND5,Ndufa1,Ndufb5,Ndufa3,Ndufb3,Ndufa6,Ndufb11,Ndufs6
7_Member	Reactome Gene Sets	R-MMU-6799198	Complex I biogenesis	-7.0186	13/59	ND1,ND2,ND3,ND4,ND5,ND6,Ndufa1,Ndufb5,Ndufa3,Ndufb3,Ndufa6,Ndufb11,Ndufs6
7_Member	Reactome Gene Sets	R-MMU-611105	Respiratory electron transport	-6.57717	13/64	ND1,ND2,ND3,ND4,ND5,ND6,Ndufa1,Ndufb5,Ndufa3,Ndufb3,Ndufa6,Ndufb11,Ndufs6
7_Member	CORUM	CORUM:381	Respiratory chain complex I, mitochondrial	-6.42162	10/37	ND1,ND2,ND4,ND5,Ndufb5,Ndufa3,Ndufb3,Ndufa6,Ndufb11,Ndufs6
7_Member	Reactome Gene Sets	R-MMU-1428517	The citric acid (TCA) cycle and respiratory electron transport	-4.65336	16/136	ATP6,ND1,ND2,ND3,ND4,ND5,ND6,Ndufa1,Ndufb5,Ndufa3,Ndufb3,Atp5e,Ndufa6,Atp5g2,Ndufb11,Ndufs6
7_Member	GO Biological Processes	GO:0033108	mitochondrial respiratory chain complex assembly	-2.33726	8/75	Ndufa1,Ndufb5,Ndufa3,Smim20,Ndufb3,Coa4,Ndufb11,Uqcc3
8_Summary	Reactome Gene Sets	R-MMU-76009	Platelet Aggregation (Plug Formation)	-6.54472	10/36	Fn1,Gp1ba,Gp1bb,Gp5,Itga2b,Itgb3,Rasgrp2,Vwf,Gp9,Apbb1ip,Gp6,Clu,Gnb2,P2ry1,Prkce,Sytl4,Clec1b,Ppbp,Gng11,Mmrn1,F13a1,Rab27b,Mpig6b,Ly6g6f,Itga4,Nfe2,Ppp2cb,Prkar2b,Ptgir,Sell,Cd177,Esam,Hist1h3d,Hist1h3e,Gm5150,Tubb1,Sirpb1b,Gm9733,Sirpb1c,Alox12,C3,Prdx2,C1galt1c1,Treml1,Acta2,Cd151,Gpx1,Yap1,Myoz1,Hopx,Nlrp6,Scrib,Mylk,Gucy1b1,Itga1,Ptpro,Scnn1a,Usf2,Zbtb7b,Celsr2,Tifab,Gypa,Il3ra,Cd59b
8_Member	Reactome Gene Sets	R-MMU-76009	Platelet Aggregation (Plug Formation)	-6.54472	10/36	Fn1,Gp1ba,Gp1bb,Gp5,Itga2b,Itgb3,Rasgrp2,Vwf,Gp9,Apbb1ip
8_Member	Reactome Gene Sets	R-MMU-75892	Platelet Adhesion to exposed collagen	-6.14843	6/11	Gp1ba,Gp1bb,Gp5,Vwf,Gp9,Gp6
8_Member	Reactome Gene Sets	R-MMU-76002	Platelet activation, signaling and aggregation	-4.66666	24/265	Clu,Fn1,Gnb2,Gp1ba,Gp1bb,Gp5,Itga2b,Itgb3,P2ry1,Prkce,Rasgrp2,Vwf,Sytl4,Gp9,Apbb1ip,Clec1b,Ppbp,Gng11,Mmrn1,F13a1,Rab27b,Mpig6b,Gp6,Ly6g6f
8_Member	Reactome Gene Sets	R-MMU-109582	Hemostasis	-4.51139	39/555	Clu,Fn1,Gnb2,Gp1ba,Gp1bb,Gp5,Itga2b,Itga4,Itgb3,Nfe2,P2ry1,Prkce,Ppp2cb,Prkar2b,Ptgir,Rasgrp2,Sell,Vwf,Sytl4,Gp9,Apbb1ip,Clec1b,Ppbp,Gng11,Cd177,Esam,Mmrn1,F13a1,Rab27b,Mpig6b,Gp6,Hist1h3d,Hist1h3e,Gm5150,Ly6g6f,Tubb1,Sirpb1b,Gm9733,Sirpb1c
8_Member	Reactome Gene Sets	R-MMU-430116	GP1b-IX-V activation signalling	-4.47852	5/12	Gp1ba,Gp1bb,Gp5,Vwf,Gp9
8_Member	GO Biological Processes	GO:0007596	blood coagulation	-4.39901	17/158	Alox12,C3,Gp1ba,Gp1bb,Gp5,Itga2b,Itgb3,P2ry1,Prdx2,Vwf,Gp9,C1galt1c1,Mmrn1,Treml1,F13a1,Mpig6b,Gp6
8_Member	GO Biological Processes	GO:0007599	hemostasis	-4.32924	17/160	Alox12,C3,Gp1ba,Gp1bb,Gp5,Itga2b,Itgb3,P2ry1,Prdx2,Vwf,Gp9,C1galt1c1,Mmrn1,Treml1,F13a1,Mpig6b,Gp6
8_Member	GO Biological Processes	GO:0050817	coagulation	-4.29483	17/161	Alox12,C3,Gp1ba,Gp1bb,Gp5,Itga2b,Itgb3,P2ry1,Prdx2,Vwf,Gp9,C1galt1c1,Mmrn1,Treml1,F13a1,Mpig6b,Gp6
8_Member	GO Biological Processes	GO:0042060	wound healing	-4.24269	28/355	Acta2,Alox12,C3,Cd151,Fn1,Gp1ba,Gp1bb,Gp5,Gpx1,Itga2b,Itgb3,P2ry1,Prkce,Prdx2,Vwf,Yap1,Gp9,Myoz1,C1galt1c1,Mmrn1,Treml1,F13a1,Hopx,Nlrp6,Scrib,Mpig6b,Mylk,Gp6
8_Member	Reactome Gene Sets	R-MMU-354194	GRB2:SOS provides linkage to MAPK signaling for Integrins	-4.10112	5/14	Fn1,Itga2b,Itgb3,Vwf,Apbb1ip
8_Member	Reactome Gene Sets	R-MMU-372708	p130Cas linkage to MAPK signaling for integrins	-4.10112	5/14	Fn1,Itga2b,Itgb3,Vwf,Apbb1ip
8_Member	KEGG Pathway	mmu04611	Platelet activation	-3.95125	14/124	Gp1ba,Gp1bb,Gp5,Itga2b,Itgb3,P2ry1,Ptgir,Rasgrp2,Vwf,Gucy1b1,Gp9,Apbb1ip,Mylk,Gp6
8_Member	KEGG Pathway	mmu04512	ECM-receptor interaction	-3.84114	11/83	Fn1,Gp1ba,Gp1bb,Gp5,Itga2b,Itga4,Itgb3,Vwf,Gp9,Itga1,Gp6
8_Member	Reactome Gene Sets	R-MMU-354192	Integrin alphaIIb beta3 signaling	-3.64596	6/26	Fn1,Itga2b,Itgb3,Rasgrp2,Vwf,Apbb1ip
8_Member	Reactome Gene Sets	R-MMU-9006921	Integrin signaling	-3.64596	6/26	Fn1,Itga2b,Itgb3,Rasgrp2,Vwf,Apbb1ip
8_Member	Reactome Gene Sets	R-MMU-140877	Formation of Fibrin Clot (Clotting Cascade)	-3.44499	7/39	Gp1ba,Gp1bb,Gp5,Vwf,Gp9,Cd177,F13a1
8_Member	GO Biological Processes	GO:0050878	regulation of body fluid levels	-3.3697	25/341	Alox12,C3,Gp1ba,Gp1bb,Gp5,Itga2b,Itgb3,P2ry1,Prkce,Ptpro,Scnn1a,Prdx2,Usf2,Vwf,Zbtb7b,Celsr2,Gp9,C1galt1c1,Mmrn1,Treml1,F13a1,Nlrp6,Mpig6b,Tifab,Gp6
8_Member	KEGG Pathway	mmu04640	Hematopoietic cell lineage	-3.32069	11/95	Gp1ba,Gp1bb,Gp5,Gypa,Il3ra,Itga2b,Itga4,Itgb3,Gp9,Itga1,Cd59b
8_Member	Reactome Gene Sets	R-MMU-140837	Intrinsic Pathway of Fibrin Clot Formation	-2.9891	5/23	Gp1ba,Gp1bb,Gp5,Vwf,Gp9
8_Member	GO Biological Processes	GO:0030168	platelet activation	-2.76501	9/79	Alox12,Gp1ba,Gp5,Itga2b,Itgb3,P2ry1,Vwf,C1galt1c1,Treml1
8_Member	Reactome Gene Sets	R-MMU-114608	Platelet degranulation	-2.08201	11/136	Clu,Fn1,Itga2b,Itgb3,Vwf,Sytl4,Ppbp,Mmrn1,F13a1,Rab27b,Ly6g6f
8_Member	GO Biological Processes	GO:0009611	response to wounding	-2.06275	28/494	Acta2,Alox12,C3,Cd151,Fn1,Gp1ba,Gp1bb,Gp5,Gpx1,Itga2b,Itgb3,P2ry1,Prkce,Prdx2,Vwf,Yap1,Gp9,Myoz1,C1galt1c1,Mmrn1,Treml1,F13a1,Hopx,Nlrp6,Scrib,Mpig6b,Mylk,Gp6
9_Summary	GO Biological Processes	GO:0051259	protein complex oligomerization	-6.24493	47/619	Ache,Adipoq,Aldh1a1,Alox5ap,Clu,Stom,Rack1,Gnmt,Hba-a1,Slc6a4,Insr,Kcnab2,Pfkm,Rps19,Slc4a1,Snca,Trim21,Vwf,Mpp2,Hgsnat,Sept9,Mgst1,Ahnak,Fis1,Uqcrh,Ikzf5,Ly6g6c,Tmem38a,Chmp4b,Trps1,Hist2h4,Hscb,Atl3,Bmf,Tifa,Hbq1a,Kctd12,Hist1h3d,Hist1h3e,Hist1h4c,Hist1h4i,Gchfr,Tmcc1,Hbq1b,Rnf213,Hist1h4m,Hbb-bt
9_Member	GO Biological Processes	GO:0051259	protein complex oligomerization	-6.24493	47/619	Ache,Adipoq,Aldh1a1,Alox5ap,Clu,Stom,Rack1,Gnmt,Hba-a1,Slc6a4,Insr,Kcnab2,Pfkm,Rps19,Slc4a1,Snca,Trim21,Vwf,Mpp2,Hgsnat,Sept9,Mgst1,Ahnak,Fis1,Uqcrh,Ikzf5,Ly6g6c,Tmem38a,Chmp4b,Trps1,Hist2h4,Hscb,Atl3,Bmf,Tifa,Hbq1a,Kctd12,Hist1h3d,Hist1h3e,Hist1h4c,Hist1h4i,Gchfr,Tmcc1,Hbq1b,Rnf213,Hist1h4m,Hbb-bt
9_Member	GO Biological Processes	GO:0051291	protein heterooligomerization	-5.08293	19/170	Adipoq,Hba-a1,Insr,Kcnab2,Sept9,Uqcrh,Ikzf5,Trps1,Hist2h4,Hbq1a,Hist1h3d,Hist1h3e,Hist1h4c,Hist1h4i,Gchfr,Tmcc1,Hbq1b,Hist1h4m,Hbb-bt
10_Summary	Reactome Gene Sets	R-MMU-1247673	Erythrocytes take up oxygen and release carbon dioxide	-5.82938	4/4	Hba-a1,Hba-a2,Hbb-bs,Hbb-bt,Car2,Slc4a1,Hp,Apol11b,Gypa,Gypc
10_Member	Reactome Gene Sets	R-MMU-1247673	Erythrocytes take up oxygen and release carbon dioxide	-5.82938	4/4	Hba-a1,Hba-a2,Hbb-bs,Hbb-bt
10_Member	Reactome Gene Sets	R-MMU-1237044	Erythrocytes take up carbon dioxide and release oxygen	-5.37468	6/14	Car2,Hba-a1,Slc4a1,Hba-a2,Hbb-bs,Hbb-bt
10_Member	Reactome Gene Sets	R-MMU-1480926	O2/CO2 exchange in erythrocytes	-5.37468	6/14	Car2,Hba-a1,Slc4a1,Hba-a2,Hbb-bs,Hbb-bt
10_Member	Reactome Gene Sets	R-MMU-2168880	Scavenging of heme from plasma	-3.8532	6/24	Hba-a1,Hp,Hba-a2,Apol11b,Hbb-bs,Hbb-bt
10_Member	Reactome Gene Sets	R-MMU-2173782	Binding and Uptake of Ligands by Scavenger Receptors	-2.78352	6/37	Hba-a1,Hp,Hba-a2,Apol11b,Hbb-bs,Hbb-bt
10_Member	KEGG Pathway	mmu05144	Malaria	-2.15762	6/49	Gypa,Hba-a1,Gypc,Hba-a2,Hbb-bs,Hbb-bt
11_Summary	GO Biological Processes	GO:0042743	hydrogen peroxide metabolic process	-5.50488	11/56	Cybb,Gpx1,Hba-a1,Hp,Insr,COX2,Snca,Prdx2,Hbq1a,Hbq1b,Hbb-bt,Alas2,Bpgm,Fech,Gamt,Gnmt,Gstm1,Kcnab2,Pfkm,Rpia,Spta1,Vnn3,Pgam2,Mgst1,Mocs1,Ireb2,Ethe1,Mocos,Oxsm,Mcee,Hscb,Pgd,Ache,Chil3,Cyp2d22,Chil4,Cyp2ab1
11_Member	GO Biological Processes	GO:0042743	hydrogen peroxide metabolic process	-5.50488	11/56	Cybb,Gpx1,Hba-a1,Hp,Insr,COX2,Snca,Prdx2,Hbq1a,Hbq1b,Hbb-bt
11_Member	GO Biological Processes	GO:0042744	hydrogen peroxide catabolic process	-5.19801	8/30	Gpx1,Hba-a1,Hp,Snca,Prdx2,Hbq1a,Hbq1b,Hbb-bt
11_Member	GO Biological Processes	GO:0010310	regulation of hydrogen peroxide metabolic process	-3.7876	5/16	Hp,Insr,COX2,Snca,Prdx2
11_Member	GO Biological Processes	GO:0017001	antibiotic catabolic process	-3.56568	8/49	Gpx1,Hba-a1,Hp,Snca,Prdx2,Hbq1a,Hbq1b,Hbb-bt
11_Member	GO Biological Processes	GO:0051186	cofactor metabolic process	-3.26305	32/489	Alas2,Bpgm,Cybb,Fech,Gamt,Gnmt,Gpx1,Gstm1,Hba-a1,Hp,Insr,Kcnab2,COX2,Pfkm,Rpia,Snca,Spta1,Prdx2,Vnn3,Pgam2,Mgst1,Mocs1,Ireb2,Ethe1,Mocos,Oxsm,Mcee,Hscb,Pgd,Hbq1a,Hbq1b,Hbb-bt
11_Member	GO Biological Processes	GO:0051187	cofactor catabolic process	-2.95815	8/60	Gpx1,Hba-a1,Hp,Snca,Prdx2,Hbq1a,Hbq1b,Hbb-bt
11_Member	GO Biological Processes	GO:0016999	antibiotic metabolic process	-2.60848	12/133	Cybb,Gpx1,Hba-a1,Hp,Insr,COX2,Snca,Prdx2,Ireb2,Hbq1a,Hbq1b,Hbb-bt
11_Member	GO Biological Processes	GO:0042737	drug catabolic process	-2.54929	13/153	Ache,Chil3,Gpx1,Hba-a1,Hp,Snca,Prdx2,Cyp2d22,Chil4,Hbq1a,Cyp2ab1,Hbq1b,Hbb-bt
12_Summary	GO Biological Processes	GO:0070813	hydrogen sulfide metabolic process	-4.67778	4/6	Sp1,Sqor,Ethe1,Mpst,Urm1,Ctu1
12_Member	GO Biological Processes	GO:0070813	hydrogen sulfide metabolic process	-4.67778	4/6	Sp1,Sqor,Ethe1,Mpst
12_Member	KEGG Pathway	mmu04122	Sulfur relay system	-2.68021	3/8	Urm1,Ctu1,Mpst
12_Member	Reactome Gene Sets	R-MMU-1614558	Degradation of cysteine and homocysteine	-2.37197	3/10	Sqor,Ethe1,Mpst
12_Member	KEGG Pathway	mmu00920	Sulfur metabolism	-2.24501	3/11	Sqor,Ethe1,Mpst
12_Member	GO Biological Processes	GO:0009404	toxin metabolic process	-2.18341	4/22	Sp1,Sqor,Ethe1,Mpst
13_Summary	GO Biological Processes	GO:0042273	ribosomal large subunit biogenesis	-4.62811	12/81	Rplp0,Rpl10a,Rpl26,Rpl6,Rpl7,Rpl7a,Rpl35a,Rpl11,Rpl14,Rpl38,Rpl10,Rpl23a
13_Member	GO Biological Processes	GO:0042273	ribosomal large subunit biogenesis	-4.62811	12/81	Rplp0,Rpl10a,Rpl26,Rpl6,Rpl7,Rpl7a,Rpl35a,Rpl11,Rpl14,Rpl38,Rpl10,Rpl23a
13_Member	GO Biological Processes	GO:0000027	ribosomal large subunit assembly	-2.72172	6/38	Rplp0,Rpl6,Rpl11,Rpl38,Rpl10,Rpl23a
14_Summary	Reactome Gene Sets	R-MMU-5578749	Transcriptional regulation by small RNAs	-4.47605	11/71	Hist1h2bc,Polr2i,Hist2h4,Ago1,Hist1h3d,Hist1h3e,Hist1h4c,Hist1h4i,Hist1h2ac,Hist1h2bg,Hist1h4m,Uba52,Anapc11,Rps6ka3,Aldh1a1,Rara,Rarg,Sp1,Usf2,Rdh10,Zfp217,Hist1h1d,Hmga2,Cbx8,Hist1h1e,Msl1,Rabgap1l,Mpig6b,Wasf2,Hist3h2a,Bnip3l,Ccnk,Csnk2a2,Hipk1,Max,Ppp2cb,Prdx2,Thra,Yap1,Zfp108,Zfp112,Trp53inp1,Lamtor4,Zkscan14,Steap3,9130019O22Rik,Pip4k2b,Zfp658,Zfp719,Tfdp2,Zfp729a,Zfp764,D3Ertd254e,Zfp738,Z…
14_Member	Reactome Gene Sets	R-MMU-5578749	Transcriptional regulation by small RNAs	-4.47605	11/71	Hist1h2bc,Polr2i,Hist2h4,Ago1,Hist1h3d,Hist1h3e,Hist1h4c,Hist1h4i,Hist1h2ac,Hist1h2bg,Hist1h4m
14_Member	Reactome Gene Sets	R-MMU-2559582	Senescence-Associated Secretory Phenotype (SASP)	-4.06994	12/92	Uba52,Anapc11,Hist1h2bc,Hist2h4,Rps6ka3,Hist1h3d,Hist1h3e,Hist1h4c,Hist1h4i,Hist1h2ac,Hist1h2bg,Hist1h4m
14_Member	Reactome Gene Sets	R-MMU-9006931	Signaling by Nuclear Receptors	-3.99885	17/170	Aldh1a1,Rara,Rarg,Sp1,Usf2,Hist1h2bc,Polr2i,Hist2h4,Rdh10,Zfp217,Hist1h3d,Hist1h3e,Hist1h4c,Hist1h4i,Hist1h2ac,Hist1h2bg,Hist1h4m
14_Member	Reactome Gene Sets	R-MMU-211000	Gene Silencing by RNA	-3.9877	11/80	Hist1h2bc,Polr2i,Hist2h4,Ago1,Hist1h3d,Hist1h3e,Hist1h4c,Hist1h4i,Hist1h2ac,Hist1h2bg,Hist1h4m
14_Member	Reactome Gene Sets	R-MMU-427413	NoRC negatively regulates rRNA expression	-3.95244	9/55	Hist1h2bc,Hist2h4,Hist1h3d,Hist1h3e,Hist1h4c,Hist1h4i,Hist1h2ac,Hist1h2bg,Hist1h4m
14_Member	Reactome Gene Sets	R-MMU-9018519	Estrogen-dependent gene expression	-3.8322	13/112	Sp1,Usf2,Hist1h2bc,Polr2i,Hist2h4,Zfp217,Hist1h3d,Hist1h3e,Hist1h4c,Hist1h4i,Hist1h2ac,Hist1h2bg,Hist1h4m
14_Member	Reactome Gene Sets	R-MMU-427359	SIRT1 negatively regulates rRNA expression	-3.82872	9/57	Hist1h2bc,Hist2h4,Hist1h3d,Hist1h3e,Hist1h4c,Hist1h4i,Hist1h2ac,Hist1h2bg,Hist1h4m
14_Member	Reactome Gene Sets	R-MMU-73728	RNA Polymerase I Promoter Opening	-3.82872	9/57	Hist1h2bc,Hist2h4,Hist1h3d,Hist1h3e,Hist1h4c,Hist1h4i,Hist1h2ac,Hist1h2bg,Hist1h4m
14_Member	Reactome Gene Sets	R-MMU-5250941	Negative epigenetic regulation of rRNA expression	-3.76899	9/58	Hist1h2bc,Hist2h4,Hist1h3d,Hist1h3e,Hist1h4c,Hist1h4i,Hist1h2ac,Hist1h2bg,Hist1h4m
14_Member	Reactome Gene Sets	R-MMU-5625886	Activated PKN1 stimulates transcription of AR (androgen receptor) regulated genes KLK2 and KLK3	-3.7106	9/59	Hist1h2bc,Hist2h4,Hist1h3d,Hist1h3e,Hist1h4c,Hist1h4i,Hist1h2ac,Hist1h2bg,Hist1h4m
14_Member	Reactome Gene Sets	R-MMU-2559583	Cellular Senescence	-3.705	16/163	Hist1h1d,Hmga2,Uba52,Cbx8,Hist1h1e,Anapc11,Hist1h2bc,Hist2h4,Rps6ka3,Hist1h3d,Hist1h3e,Hist1h4c,Hist1h4i,Hist1h2ac,Hist1h2bg,Hist1h4m
14_Member	Reactome Gene Sets	R-MMU-8939211	ESR-mediated signaling	-3.67817	13/116	Sp1,Usf2,Hist1h2bc,Polr2i,Hist2h4,Zfp217,Hist1h3d,Hist1h3e,Hist1h4c,Hist1h4i,Hist1h2ac,Hist1h2bg,Hist1h4m
14_Member	Reactome Gene Sets	R-MMU-2559586	DNA Damage/Telomere Stress Induced Senescence	-3.51676	10/76	Hist1h1d,Hmga2,Hist1h1e,Hist1h2bc,Hist2h4,Hist1h4c,Hist1h4i,Hist1h2ac,Hist1h2bg,Hist1h4m
14_Member	Reactome Gene Sets	R-MMU-3214847	HATs acetylate histones	-3.38592	9/65	Hist1h2bc,Msl1,Hist2h4,Hist1h3d,Hist1h3e,Hist1h4c,Hist1h4i,Hist1h2bg,Hist1h4m
14_Member	GO Biological Processes	GO:0030219	megakaryocyte differentiation	-3.38329	8/52	Sp1,Rabgap1l,Hist2h4,Mpig6b,Wasf2,Hist1h4c,Hist1h4i,Hist1h4m
14_Member	Reactome Gene Sets	R-MMU-212300	PRC2 methylates histones and DNA	-3.33571	9/66	Hist1h2bc,Hist2h4,Hist1h3d,Hist1h3e,Hist1h4c,Hist1h4i,Hist1h2ac,Hist1h2bg,Hist1h4m
14_Member	Reactome Gene Sets	R-MMU-3214815	HDACs deacetylate histones	-3.29061	10/81	Hist1h2bc,Hist2h4,Hist1h3d,Hist1h3e,Hist1h4c,Hist1h4i,Hist3h2a,Hist1h2ac,Hist1h2bg,Hist1h4m
14_Member	GO Biological Processes	GO:0006335	DNA replication-dependent nucleosome assembly	-3.20566	6/31	Hist2h4,Hist1h3d,Hist1h3e,Hist1h4c,Hist1h4i,Hist1h4m
14_Member	GO Biological Processes	GO:0034723	DNA replication-dependent nucleosome organization	-3.20566	6/31	Hist2h4,Hist1h3d,Hist1h3e,Hist1h4c,Hist1h4i,Hist1h4m
14_Member	Reactome Gene Sets	R-MMU-2559580	Oxidative Stress Induced Senescence	-3.16729	11/99	Uba52,Cbx8,Hist1h2bc,Hist2h4,Hist1h3d,Hist1h3e,Hist1h4c,Hist1h4i,Hist1h2ac,Hist1h2bg,Hist1h4m
14_Member	Reactome Gene Sets	R-MMU-212436	Generic Transcription Pathway	-3.10657	40/672	Bnip3l,Ccnk,Csnk2a2,Hipk1,Max,Ppp2cb,Rara,Rarg,Sp1,Prdx2,Thra,Uba52,Yap1,Cbx8,Zfp108,Zfp112,Trp53inp1,Lamtor4,Zkscan14,Hist1h2bc,Steap3,Polr2i,9130019O22Rik,Hist2h4,Pip4k2b,Zfp658,Zfp719,Tfdp2,Zfp729a,Zfp764,D3Ertd254e,Hist1h3d,Hist1h3e,Hist1h4c,Hist1h4i,Hist1h2ac,Hist1h2bg,Zfp738,Hist1h4m,Zfp729b
14_Member	Reactome Gene Sets	R-MMU-8936459	RUNX1 regulates genes involved in megakaryocyte differentiation and platelet function	-2.92594	9/75	Hist1h2bc,Hist2h4,Hist1h3d,Hist1h3e,Hist1h4c,Hist1h4i,Hist1h2ac,Hist1h2bg,Hist1h4m
14_Member	KEGG Pathway	mmu05322	Systemic lupus erythematosus	-2.83771	13/142	C3,Trim21,Hist1h2bc,Hist2h4,Hist1h3d,Hist1h3e,Hist1h4c,Hist1h4i,Hist3h2a,Hist1h2ac,Hist1h2bg,H3f3c,Hist1h4m
14_Member	Reactome Gene Sets	R-MMU-5625740	RHO GTPases activate PKNs	-2.80416	9/78	Hist1h2bc,Hist2h4,Hist1h3d,Hist1h3e,Hist1h4c,Hist1h4i,Hist1h2ac,Hist1h2bg,Hist1h4m
14_Member	Reactome Gene Sets	R-MMU-73857	RNA Polymerase II Transcription	-2.7927	44/789	Bnip3l,Ccnk,Csnk2a2,Hipk1,Max,Pou2f2,Ppp2cb,Rara,Rarg,Sp1,Prdx2,Thra,Uba52,Yap1,Cbx8,Zfp108,Zfp112,Trp53inp1,Lamtor4,Magohb,Zkscan14,Hist1h2bc,Sympk,Steap3,Polr2i,9130019O22Rik,Hist2h4,Pip4k2b,Nabp1,Zfp658,Zfp719,Tfdp2,Zfp729a,Zfp764,D3Ertd254e,Hist1h3d,Hist1h3e,Hist1h4c,Hist1h4i,Hist1h2ac,Hist1h2bg,Zfp738,Hist1h4m,Zfp729b
14_Member	Reactome Gene Sets	R-MMU-2299718	Condensation of Prophase Chromosomes	-2.7256	7/51	Hist1h2bc,Hist2h4,Hist1h4c,Hist1h4i,Hist1h2ac,Hist1h2bg,Hist1h4m
14_Member	Reactome Gene Sets	R-MMU-73777	RNA Polymerase I Chain Elongation	-2.61516	9/83	Hist1h2bc,Hist2h4,Hist1h3d,Hist1h3e,Hist1h4c,Hist1h4i,Hist1h2ac,Hist1h2bg,Hist1h4m
14_Member	GO Biological Processes	GO:0045653	negative regulation of megakaryocyte differentiation	-2.61092	4/17	Hist2h4,Hist1h4c,Hist1h4i,Hist1h4m
14_Member	Reactome Gene Sets	R-MMU-3214858	RMTs methylate histone arginines	-2.60331	8/68	Hist2h4,Hist1h3d,Hist1h3e,Hist1h4c,Hist1h4i,Hist3h2a,Hist1h2ac,Hist1h4m
14_Member	Reactome Gene Sets	R-MMU-8878171	Transcriptional regulation by RUNX1	-2.59926	13/151	Csnk2a2,Uba52,Yap1,Cbx8,Hist1h2bc,Hist2h4,Hist1h3d,Hist1h3e,Hist1h4c,Hist1h4i,Hist1h2ac,Hist1h2bg,Hist1h4m
14_Member	GO Biological Processes	GO:0051290	protein heterotetramerization	-2.58013	7/54	Insr,Hist2h4,Hist1h3d,Hist1h3e,Hist1h4c,Hist1h4i,Hist1h4m
14_Member	Reactome Gene Sets	R-MMU-5250913	Positive epigenetic regulation of rRNA expression	-2.57929	9/84	Hist1h2bc,Hist2h4,Hist1h3d,Hist1h3e,Hist1h4c,Hist1h4i,Hist1h2ac,Hist1h2bg,Hist1h4m
14_Member	Reactome Gene Sets	R-MMU-5250924	B-WICH complex positively regulates rRNA expression	-2.57929	9/84	Hist1h2bc,Hist2h4,Hist1h3d,Hist1h3e,Hist1h4c,Hist1h4i,Hist1h2ac,Hist1h2bg,Hist1h4m
14_Member	Reactome Gene Sets	R-MMU-8953897	Cellular responses to external stimuli	-2.49761	25/394	Cybb,Dync1h1,Gpx1,Hist1h1d,Hmga2,Prdx2,Uba52,Cbx8,Hist1h1e,Wdr45,Lamtor4,Anapc11,Hist1h2bc,Chmp4b,Hist2h4,Rps6ka3,Atg4c,Hist1h3d,Hist1h3e,Hist1h4c,Hist1h4i,Hist1h2ac,Hist1h2bg,Tubb1,Hist1h4m
14_Member	Reactome Gene Sets	R-MMU-5693565	Recruitment and ATM-mediated phosphorylation of repair and signaling proteins at DNA double strand b	-2.20237	7/63	Uba52,Hist1h2bc,Hist2h4,Hist1h4c,Hist1h4i,Hist1h2bg,Hist1h4m
14_Member	Reactome Gene Sets	R-MMU-5693606	DNA Double Strand Break Response	-2.16502	7/64	Uba52,Hist1h2bc,Hist2h4,Hist1h4c,Hist1h4i,Hist1h2bg,Hist1h4m
14_Member	GO Biological Processes	GO:0006334	nucleosome assembly	-2.16326	9/97	Hist1h1d,Hist1h1e,Hist1h2bc,Hist2h4,Hist1h3d,Hist1h3e,Hist1h4c,Hist1h4i,Hist1h4m
14_Member	Reactome Gene Sets	R-MMU-3214842	HDMs demethylate histones	-2.15762	6/49	Hist2h4,Hist1h3d,Hist1h3e,Hist1h4c,Hist1h4i,Hist1h4m
14_Member	Reactome Gene Sets	R-MMU-2262752	Cellular responses to stress	-2.1565	21/333	Cybb,Dync1h1,Gpx1,Hist1h1d,Hmga2,Prdx2,Uba52,Cbx8,Hist1h1e,Anapc11,Hist1h2bc,Hist2h4,Rps6ka3,Hist1h3d,Hist1h3e,Hist1h4c,Hist1h4i,Hist1h2ac,Hist1h2bg,Tubb1,Hist1h4m
14_Member	Reactome Gene Sets	R-MMU-73854	RNA Polymerase I Promoter Clearance	-2.10656	9/99	Hist1h2bc,Hist2h4,Hist1h3d,Hist1h3e,Hist1h4c,Hist1h4i,Hist1h2ac,Hist1h2bg,Hist1h4m
14_Member	Reactome Gene Sets	R-MMU-4551638	SUMOylation of chromatin organization proteins	-2.10197	5/36	Cbx8,Hist2h4,Hist1h4c,Hist1h4i,Hist1h4m
14_Member	GO Biological Processes	GO:0045637	regulation of myeloid cell differentiation	-2.07261	15/214	Adipoq,Acvr1b,Car2,Itgb3,Mpl,Rara,Rarg,Prxl2a,Gas2l1,Il23a,Clec2i,Hist2h4,Hist1h4c,Hist1h4i,Hist1h4m
14_Member	GO Biological Processes	GO:0051262	protein tetramerization	-2.06209	13/175	Ache,Aldh1a1,Gnmt,Insr,Pfkm,Rps19,Snca,Hist2h4,Hist1h3d,Hist1h3e,Hist1h4c,Hist1h4i,Hist1h4m
14_Member	Reactome Gene Sets	R-MMU-212165	Epigenetic regulation of gene expression	-2.05157	9/101	Hist1h2bc,Hist2h4,Hist1h3d,Hist1h3e,Hist1h4c,Hist1h4i,Hist1h2ac,Hist1h2bg,Hist1h4m
14_Member	Reactome Gene Sets	R-MMU-73864	RNA Polymerase I Transcription	-2.05157	9/101	Hist1h2bc,Hist2h4,Hist1h3d,Hist1h3e,Hist1h4c,Hist1h4i,Hist1h2ac,Hist1h2bg,Hist1h4m
15_Summary	GO Biological Processes	GO:1902255	positive regulation of intrinsic apoptotic signaling pathway by p53 class mediator	-4.0332	4/8	Rpl26,Rps7,Rpl11,Steap3,Rpl23,Csnk2a2,Styx,Svip,Bag6,Clu,Rack1,Rps3,Fis1,Hint1,Hipk1,E2f2,Dyrk3,Acer2
15_Member	GO Biological Processes	GO:1902255	positive regulation of intrinsic apoptotic signaling pathway by p53 class mediator	-4.0332	4/8	Rpl26,Rps7,Rpl11,Steap3
15_Member	GO Biological Processes	GO:1901798	positive regulation of signal transduction by p53 class mediator	-2.90019	5/24	Rpl26,Rps7,Rpl23,Rpl11,Steap3
15_Member	GO Biological Processes	GO:2000059	negative regulation of ubiquitin-dependent protein catabolic process	-2.82909	7/49	Csnk2a2,Rps7,Styx,Rpl23,Rpl11,Svip,Bag6
15_Member	GO Biological Processes	GO:2001244	positive regulation of intrinsic apoptotic signaling pathway	-2.72934	8/65	Clu,Rack1,Rpl26,Rps7,Rps3,Fis1,Rpl11,Steap3
15_Member	GO Biological Processes	GO:1904667	negative regulation of ubiquitin protein ligase activity	-2.37197	3/10	Rps7,Rpl23,Rpl11
15_Member	GO Biological Processes	GO:1902231	positive regulation of intrinsic apoptotic signaling pathway in response to DNA damage	-2.24501	3/11	Rpl26,Rps3,Steap3
15_Member	GO Biological Processes	GO:0072332	intrinsic apoptotic signaling pathway by p53 class mediator	-2.23377	8/78	Hint1,Hipk1,Rpl26,Rps7,Rpl11,Steap3,Bag6,E2f2
15_Member	GO Biological Processes	GO:0072331	signal transduction by p53 class mediator	-2.10517	11/135	Hint1,Hipk1,Rpl26,Rps7,Rpl23,Rpl11,Steap3,Bag6,Dyrk3,Acer2,E2f2
16_Summary	GO Biological Processes	GO:0015990	electron transport coupled proton transport	-3.78058	3/4	COX1,CYTB,ND4,Fn1,Pgam2,Uqcrh,Uqcc3
16_Member	GO Biological Processes	GO:0015990	electron transport coupled proton transport	-3.78058	3/4	COX1,CYTB,ND4
16_Member	GO Biological Processes	GO:0046689	response to mercury ion	-2.24501	3/11	Fn1,CYTB,Pgam2
16_Member	GO Biological Processes	GO:0006122	mitochondrial electron transport, ubiquinol to cytochrome c	-2.1314	3/12	CYTB,Uqcrh,Uqcc3
17_Summary	Reactome Gene Sets	R-MMU-6798695	Neutrophil degranulation	-3.66586	35/525	Ampd3,C3,Cap1,Capn1,Cybb,Dync1h1,Ear2,Eef2,Stom,Hp,Kcnab2,Mmp8,Sell,Slpi,Gyg,Hgsnat,Rnase2b,Bri3,Mgst1,Ppbp,Cd177,Mettl7a1,Svip,Siglece,Plac8,Clec12a,Serpinb10,Cd59b,Gm5150,Pnp2,Sirpb1b,Gm9733,Sirpb1c,Hbb-bs,Hbb-bt
17_Member	Reactome Gene Sets	R-MMU-6798695	Neutrophil degranulation	-3.66586	35/525	Ampd3,C3,Cap1,Capn1,Cybb,Dync1h1,Ear2,Eef2,Stom,Hp,Kcnab2,Mmp8,Sell,Slpi,Gyg,Hgsnat,Rnase2b,Bri3,Mgst1,Ppbp,Cd177,Mettl7a1,Svip,Siglece,Plac8,Clec12a,Serpinb10,Cd59b,Gm5150,Pnp2,Sirpb1b,Gm9733,Sirpb1c,Hbb-bs,Hbb-bt
18_Summary	GO Biological Processes	GO:0016032	viral process	-3.45993	22/279	Bak1,Ccnk,Stom,Insr,Itgb3,Pabpc1,Pcbp2,Trim10,Slpi,Sp1,Trim21,Vapb,Isg20,Eif3f,Ifitm3,Gpr15,Chmp4b,Fam111a,Ifitm6,Tnfrsf14,Zfp72,Ythdc2,Fn1,Gpx1,Rpl30,Rps19,Spag11b
18_Member	GO Biological Processes	GO:0016032	viral process	-3.45993	22/279	Bak1,Ccnk,Stom,Insr,Itgb3,Pabpc1,Pcbp2,Trim10,Slpi,Sp1,Trim21,Vapb,Isg20,Eif3f,Ifitm3,Gpr15,Chmp4b,Fam111a,Ifitm6,Tnfrsf14,Zfp72,Ythdc2
18_Member	GO Biological Processes	GO:1903900	regulation of viral life cycle	-3.24197	14/145	Ccnk,Stom,Pabpc1,Trim10,Slpi,Trim21,Vapb,Isg20,Ifitm3,Chmp4b,Fam111a,Ifitm6,Zfp72,Ythdc2
18_Member	GO Biological Processes	GO:0019058	viral life cycle	-3.21317	17/198	Ccnk,Stom,Itgb3,Pabpc1,Pcbp2,Trim10,Slpi,Trim21,Vapb,Isg20,Ifitm3,Gpr15,Chmp4b,Fam111a,Ifitm6,Zfp72,Ythdc2
18_Member	GO Biological Processes	GO:0044827	modulation by host of viral genome replication	-2.8282	4/15	Ccnk,Stom,Vapb,Ythdc2
18_Member	GO Biological Processes	GO:0044788	modulation by host of viral process	-2.81582	5/25	Ccnk,Stom,Vapb,Zfp72,Ythdc2
18_Member	GO Biological Processes	GO:0044403	symbiont process	-2.79085	24/354	Bak1,Ccnk,Stom,Fn1,Gpx1,Insr,Itgb3,Pabpc1,Pcbp2,Trim10,Slpi,Sp1,Trim21,Vapb,Isg20,Eif3f,Ifitm3,Gpr15,Chmp4b,Fam111a,Ifitm6,Tnfrsf14,Zfp72,Ythdc2
18_Member	GO Biological Processes	GO:0045069	regulation of viral genome replication	-2.78404	10/94	Ccnk,Stom,Pabpc1,Slpi,Vapb,Isg20,Ifitm3,Fam111a,Ifitm6,Ythdc2
18_Member	GO Biological Processes	GO:0050792	regulation of viral process	-2.77294	15/180	Ccnk,Stom,Pabpc1,Trim10,Slpi,Sp1,Trim21,Vapb,Isg20,Ifitm3,Chmp4b,Fam111a,Ifitm6,Zfp72,Ythdc2
18_Member	GO Biological Processes	GO:0044419	interspecies interaction between organisms	-2.76188	27/418	Bak1,Ccnk,Stom,Fn1,Gpx1,Insr,Itgb3,Pabpc1,Pcbp2,Trim10,Rpl30,Rps19,Slpi,Sp1,Trim21,Vapb,Isg20,Eif3f,Ifitm3,Gpr15,Chmp4b,Fam111a,Ifitm6,Tnfrsf14,Zfp72,Ythdc2,Spag11b
18_Member	GO Biological Processes	GO:0019079	viral genome replication	-2.75612	11/111	Ccnk,Stom,Pabpc1,Pcbp2,Slpi,Vapb,Isg20,Ifitm3,Fam111a,Ifitm6,Ythdc2
18_Member	GO Biological Processes	GO:0044794	positive regulation by host of viral process	-2.71535	4/16	Stom,Vapb,Zfp72,Ythdc2
18_Member	GO Biological Processes	GO:0044829	positive regulation by host of viral genome replication	-2.68021	3/8	Stom,Vapb,Ythdc2
18_Member	GO Biological Processes	GO:1903901	negative regulation of viral life cycle	-2.65165	9/82	Ccnk,Trim10,Slpi,Trim21,Vapb,Isg20,Ifitm3,Fam111a,Ifitm6
18_Member	GO Biological Processes	GO:0051701	interaction with host	-2.63333	11/115	Ccnk,Insr,Itgb3,Trim10,Trim21,Vapb,Ifitm3,Gpr15,Chmp4b,Ifitm6,Zfp72
18_Member	GO Biological Processes	GO:0045071	negative regulation of viral genome replication	-2.44517	7/57	Ccnk,Slpi,Vapb,Isg20,Ifitm3,Fam111a,Ifitm6
18_Member	GO Biological Processes	GO:1903902	positive regulation of viral life cycle	-2.40232	7/58	Stom,Pabpc1,Trim21,Vapb,Chmp4b,Zfp72,Ythdc2
18_Member	GO Biological Processes	GO:0051702	interaction with symbiont	-2.30211	8/76	Ccnk,Stom,Fn1,Gpx1,Sp1,Vapb,Zfp72,Ythdc2
18_Member	GO Biological Processes	GO:0048525	negative regulation of viral process	-2.16326	9/97	Ccnk,Trim10,Slpi,Trim21,Vapb,Isg20,Ifitm3,Fam111a,Ifitm6
18_Member	GO Biological Processes	GO:0048524	positive regulation of viral process	-2.13588	8/81	Stom,Pabpc1,Sp1,Trim21,Vapb,Chmp4b,Zfp72,Ythdc2
18_Member	GO Biological Processes	GO:0043903	regulation of symbiosis, encompassing mutualism through parasitism	-2.03743	15/216	Ccnk,Stom,Pabpc1,Trim10,Slpi,Sp1,Trim21,Vapb,Isg20,Ifitm3,Chmp4b,Fam111a,Ifitm6,Zfp72,Ythdc2
19_Summary	GO Biological Processes	GO:0033194	response to hydroperoxide	-3.40024	5/19	Gpx1,ND1,Sp1,Mgst1,Trp53inp1
19_Member	GO Biological Processes	GO:0033194	response to hydroperoxide	-3.40024	5/19	Gpx1,ND1,Sp1,Mgst1,Trp53inp1
20_Summary	GO Biological Processes	GO:0032271	regulation of protein polymerization	-3.23766	18/215	Add2,Capn1,Gda,Prkce,Tmsb10,Snca,Spta1,Tmod1,Rps3,Add3,Arpc3,Cdc42ep5,Tppp3,Eml2,Clec2i,Cdc42ep2,Wipf1,Cdc42ep3,Clu,Lmo4,Thra,Rpl13a,Svip,Cap1,Casp4,Cd2ap,Epha1,Id1,Msrb1,Rnd3,Rhoj,Pls1,Cald1,Ppp1r9b,Samd14,Wasf2,Dr1,Rack1,Bmf,Stxbp6,Bcl6,Itgb3,Amotl2,Myoz1,Alkbh4,Arhgef18,Parvb,Tesk2,Epb41,Neurl2,Dync1h1,Gas2l1,Tchh
20_Member	GO Biological Processes	GO:0032271	regulation of protein polymerization	-3.23766	18/215	Add2,Capn1,Gda,Prkce,Tmsb10,Snca,Spta1,Tmod1,Rps3,Add3,Arpc3,Cdc42ep5,Tppp3,Eml2,Clec2i,Cdc42ep2,Wipf1,Cdc42ep3
20_Member	GO Biological Processes	GO:0031333	negative regulation of protein complex assembly	-2.78271	13/144	Add2,Capn1,Clu,Lmo4,Tmsb10,Snca,Spta1,Thra,Tmod1,Rpl13a,Add3,Eml2,Svip
20_Member	GO Biological Processes	GO:0007015	actin filament organization	-2.65867	26/404	Add2,Cap1,Capn1,Casp4,Cd2ap,Epha1,Id1,Prkce,Tmsb10,Spta1,Tmod1,Add3,Msrb1,Arpc3,Cdc42ep5,Rnd3,Rhoj,Clec2i,Pls1,Cdc42ep2,Cald1,Wipf1,Ppp1r9b,Samd14,Wasf2,Cdc42ep3
20_Member	GO Biological Processes	GO:0030041	actin filament polymerization	-2.44093	14/176	Add2,Capn1,Prkce,Tmsb10,Spta1,Tmod1,Add3,Msrb1,Arpc3,Cdc42ep5,Clec2i,Cdc42ep2,Wipf1,Cdc42ep3
20_Member	GO Biological Processes	GO:0051258	protein polymerization	-2.43071	19/274	Add2,Capn1,Gda,Prkce,Tmsb10,Snca,Spta1,Tmod1,Rps3,Add3,Msrb1,Arpc3,Cdc42ep5,Tppp3,Eml2,Clec2i,Cdc42ep2,Wipf1,Cdc42ep3
20_Member	GO Biological Processes	GO:0043254	regulation of protein complex assembly	-2.37422	27/446	Add2,Capn1,Clu,Dr1,Gda,Rack1,Lmo4,Prkce,Tmsb10,Snca,Spta1,Thra,Tmod1,Rpl13a,Rps3,Add3,Arpc3,Cdc42ep5,Tppp3,Eml2,Svip,Clec2i,Cdc42ep2,Bmf,Wipf1,Stxbp6,Cdc42ep3
20_Member	GO Biological Processes	GO:0030833	regulation of actin filament polymerization	-2.35946	13/161	Add2,Capn1,Prkce,Tmsb10,Spta1,Tmod1,Add3,Arpc3,Cdc42ep5,Clec2i,Cdc42ep2,Wipf1,Cdc42ep3
20_Member	GO Biological Processes	GO:0030036	actin cytoskeleton organization	-2.31628	36/652	Add2,Bcl6,Cap1,Capn1,Casp4,Cd2ap,Epha1,Id1,Itgb3,Prkce,Tmsb10,Spta1,Tmod1,Add3,Msrb1,Amotl2,Arpc3,Cdc42ep5,Myoz1,Alkbh4,Rnd3,Rhoj,Clec2i,Arhgef18,Pls1,Cdc42ep2,Cald1,Parvb,Wipf1,Ppp1r9b,Samd14,Tesk2,Wasf2,Cdc42ep3,Epb41,Neurl2
20_Member	GO Biological Processes	GO:0032272	negative regulation of protein polymerization	-2.30211	8/76	Add2,Capn1,Tmsb10,Snca,Spta1,Tmod1,Add3,Eml2
20_Member	GO Biological Processes	GO:0097435	supramolecular fiber organization	-2.27467	37/679	Add2,Cap1,Capn1,Casp4,Cd2ap,Clu,Dync1h1,Epha1,Gda,Id1,Prkce,Tmsb10,Snca,Spta1,Tmod1,Rps3,Add3,Msrb1,Arpc3,Cdc42ep5,Myoz1,Tppp3,Eml2,Rnd3,Gas2l1,Rhoj,Clec2i,Tchh,Pls1,Cdc42ep2,Cald1,Wipf1,Ppp1r9b,Samd14,Wasf2,Cdc42ep3,Neurl2
20_Member	GO Biological Processes	GO:0008154	actin polymerization or depolymerization	-2.21944	15/206	Add2,Cap1,Capn1,Prkce,Tmsb10,Spta1,Tmod1,Add3,Msrb1,Arpc3,Cdc42ep5,Clec2i,Cdc42ep2,Wipf1,Cdc42ep3
20_Member	GO Biological Processes	GO:1902903	regulation of supramolecular fiber organization	-2.18912	22/352	Add2,Capn1,Clu,Epha1,Gda,Id1,Prkce,Tmsb10,Snca,Spta1,Tmod1,Rps3,Add3,Arpc3,Cdc42ep5,Eml2,Gas2l1,Clec2i,Cdc42ep2,Wipf1,Wasf2,Cdc42ep3

## Sheet: Upregulated
GroupID	Category	Term	Description	LogP	InTerm_InList	Symbols
1_Summary	GO Biological Processes	GO:0030155	regulation of cell adhesion	-29.7949	161/677	Adam8,Adam9,Angpt2,Aif1,Akt1,Apod,Arg1,Arg2,Ass1,Bcl2,Bmi1,Ddr1,Cav1,Runx3,Ctla4,Cd28,Cd36,Cd5,Cd6,Cd63,Cd80,Cd83,Cd86,Cd9,Cdh1,Cdk6,Cebpb,Cxcr4,Ccr5,Ccr7,Bcar1,Csf1,Dab2,Dapk3,Dpp4,S1pr1,Epha2,Ephb3,Ptk2,Faf1,Fbln1,Fzd7,Gata3,Pdpn,Adgrg1,H2-Aa,H2-Ab1,Hes1,Ifng,Igf1,Ccn1,Igfbp2,Cd74,Il10,Il12b,Il12rb1,Il1b,Il1rn,Il2ra,Il4ra,Il6,Il7r,Itga6,Jag1,Jag2,Jak2,Jup,Kdr,Lag3,Lama4,Lck,Ldb1,Lef1,Loxl3,Epca…
1_Member	GO Biological Processes	GO:0030155	regulation of cell adhesion	-29.7949	161/677	Adam8,Adam9,Angpt2,Aif1,Akt1,Apod,Arg1,Arg2,Ass1,Bcl2,Bmi1,Ddr1,Cav1,Runx3,Ctla4,Cd28,Cd36,Cd5,Cd6,Cd63,Cd80,Cd83,Cd86,Cd9,Cdh1,Cdk6,Cebpb,Cxcr4,Ccr5,Ccr7,Bcar1,Csf1,Dab2,Dapk3,Dpp4,S1pr1,Epha2,Ephb3,Ptk2,Faf1,Fbln1,Fzd7,Gata3,Pdpn,Adgrg1,H2-Aa,H2-Ab1,Hes1,Ifng,Igf1,Ccn1,Igfbp2,Cd74,Il10,Il12b,Il12rb1,Il1b,Il1rn,Il2ra,Il4ra,Il6,Il7r,Itga6,Jag1,Jag2,Jak2,Jup,Kdr,Lag3,Lama4,Lck,Ldb1,Lef1,Loxl3,Epca…
1_Member	GO Biological Processes	GO:0042110	T cell activation	-24.9895	123/490	Adam8,Aif1,Arg1,Arg2,Bcl2,Bcl2a1d,Prdm1,Bmi1,Zfp36l1,Cav1,Runx3,Ctla4,Cd28,Cd3d,Cd3g,Cd5,Cd6,Cd80,Cd83,Cd86,Cd8a,Cdk6,Cebpb,Cxcr4,Ccr7,Cxadr,Dpp4,Egr1,Eomes,Flt3,Fyn,Fzd5,Fzd7,Gata3,Gja1,H2-Aa,H2-Ab1,H2-Oa,Hes1,Ifng,Igf1,Igfbp2,Cd74,Il12b,Il12rb1,Il1b,Il18r1,Il2ra,Il4ra,Il6,Il7r,Gimap1,Itgax,Itk,Jag2,Kit,Mafb,Lag3,Lat,Lck,Lef1,Loxl3,Smad7,Clec4d,Myb,Nedd4,Prkcq,Prnp,Ptger4,Rasgrp1,Ccl2,Ccl5,Sox4,…
1_Member	GO Biological Processes	GO:0098609	cell-cell adhesion	-22.3963	152/720	Adam8,Aif1,Akt1,Arg1,Arg2,Ass1,Bcl2,Bmi1,Zfp36l1,Cav1,Runx3,Ctla4,Cd28,Cd34,Cd5,Cd6,Cd80,Cd83,Cd86,Cd9,Cdh1,Cdh17,Cebpb,Celsr1,Cldn1,Ccr5,Ccr7,Cxadr,Dpp4,Sparcl1,Ephb3,Ptk2,Fer,Gata3,Gcnt1,Pdpn,H2-Aa,H2-Ab1,Hes1,Ifng,Igf1,Ccn1,Igfbp2,Cd74,Il10,Il12b,Il12rb1,Il1b,Il1rn,Il2ra,Il4ra,Il6,Il7r,Itga6,Itgax,Itgb5,Jag1,Jak2,Jup,Kit,Lag3,Lck,Lef1,Loxl3,Epcam,Smad7,Mag,Cd200,Cited2,Myb,Nr4a3,Ctnnd2,Pecam1,…
1_Member	GO Biological Processes	GO:0045785	positive regulation of cell adhesion	-21.8976	104/406	Adam8,Adam9,Aif1,Bmi1,Cav1,Runx3,Cd28,Cd36,Cd5,Cd6,Cd63,Cd80,Cd83,Cd86,Cdh1,Cdk6,Ccr5,Ccr7,Csf1,Dab2,Dpp4,Ptk2,Fbln1,Gata3,Pdpn,Adgrg1,H2-Aa,H2-Ab1,Hes1,Ifng,Igf1,Ccn1,Igfbp2,Cd74,Il12b,Il12rb1,Il1b,Il2ra,Il4ra,Il6,Il7r,Itga6,Jak2,Jup,Kdr,Lck,Ldb1,Lef1,Smad7,Cited2,Myb,Nr4a3,Enpp2,Prkcq,Ptafr,Ptger4,Ptn,Rac1,Rasgrp1,Rela,Ccl2,Ccl5,Cx3cl1,Spp1,Sdc4,Tgfb2,Tgm2,Thbs1,Tnf,Tnfrsf18,Cd27,Tnfsf9,Tfrc,Tn…
1_Member	GO Biological Processes	GO:0022407	regulation of cell-cell adhesion	-20.818	99/387	Adam8,Aif1,Akt1,Arg1,Arg2,Ass1,Bmi1,Cav1,Runx3,Ctla4,Cd28,Cd5,Cd6,Cd80,Cd83,Cd86,Cd9,Cdh1,Cebpb,Ccr5,Ccr7,Dpp4,Ephb3,Ptk2,Gata3,Pdpn,H2-Aa,H2-Ab1,Hes1,Ifng,Igf1,Igfbp2,Cd74,Il10,Il12b,Il12rb1,Il1b,Il1rn,Il2ra,Il4ra,Il6,Il7r,Itga6,Jag1,Jak2,Lag3,Lck,Lef1,Loxl3,Epcam,Smad7,Cited2,Myb,Nr4a3,Prkcq,Prnp,Ptafr,Rasgrp1,Rela,Ccl2,Ccl5,Cx3cl1,Serpine2,Spint2,Sdc4,Tnf,Tnfaip3,Cd27,Tnfsf9,Tfrc,Tnfsf4,Vcam1,…
1_Member	GO Biological Processes	GO:0007159	leukocyte cell-cell adhesion	-20.1207	86/315	Adam8,Aif1,Akt1,Arg1,Arg2,Ass1,Bmi1,Cav1,Runx3,Ctla4,Cd28,Cd5,Cd6,Cd80,Cd83,Cd86,Cebpb,Ccr7,Dpp4,Gata3,Gcnt1,H2-Aa,H2-Ab1,Hes1,Ifng,Igf1,Igfbp2,Cd74,Il12b,Il12rb1,Il1b,Il2ra,Il4ra,Il6,Il7r,Lag3,Lck,Loxl3,Smad7,Myb,Nr4a3,Pecam1,Prkcq,Prnp,Ptafr,Rasgrp1,Rela,S100a8,S100a9,Ccl2,Ccl5,Sdc4,Tnf,Cd27,Tnfsf9,Tfrc,Tnfsf4,Vcam1,Zap70,Ets1,Nt5e,Elane,Icosl,Icos,Cd160,Lgals8,Zc3h8,Tbx21,Pdcd1lg2,Cd274,Twsg1,…
1_Member	GO Biological Processes	GO:1903037	regulation of leukocyte cell-cell adhesion	-19.8724	80/282	Adam8,Aif1,Akt1,Arg1,Arg2,Ass1,Bmi1,Cav1,Runx3,Ctla4,Cd28,Cd5,Cd6,Cd80,Cd83,Cd86,Cebpb,Ccr7,Dpp4,Gata3,H2-Aa,H2-Ab1,Hes1,Ifng,Igf1,Igfbp2,Cd74,Il12b,Il12rb1,Il1b,Il2ra,Il4ra,Il6,Il7r,Lag3,Lck,Loxl3,Smad7,Myb,Nr4a3,Prkcq,Prnp,Ptafr,Rasgrp1,Rela,Ccl2,Ccl5,Sdc4,Tnf,Cd27,Tnfsf9,Tfrc,Tnfsf4,Vcam1,Zap70,Ets1,Elane,Icosl,Icos,Cd160,Lgals8,Zc3h8,Tbx21,Pdcd1lg2,Cd274,Twsg1,Dusp3,Skap1,Nfkbiz,Gpnmb,Cd276,I…
1_Member	GO Biological Processes	GO:0050865	regulation of cell activation	-19.2405	141/693	Adam8,Aif1,Apoe,Arg1,Arg2,Slc7a2,Bcl2,Prdm1,Bmi1,Zfp36l1,C1qa,C5ar1,Capn3,Cav1,Runx3,Ctla4,Cd22,Cd28,Cd38,Cd5,Cd6,Cd80,Cd81,Cd83,Cd86,Cd9,Cdkn1a,Cebpb,Ccr7,Dgat1,Dpp4,Fer,Ccn2,Flt3,Gab2,Gas6,Gata3,Gclc,Pdpn,H2-Aa,H2-Ab1,H2-Oa,Hes1,Hmgb3,Ifng,Igf1,Igfbp2,Cd74,Il10,Il12b,Il12rb1,Il1b,Il2ra,Il4ra,Il6,Il7r,Jak2,Lag3,Lamp1,Lat,Lck,Loxl3,Il1rl1,Smad7,Mertk,Mmp14,Cd200,Clec4d,Myb,Nr4a3,Pdgfa,Pdgfb,Prkcq…
1_Member	GO Biological Processes	GO:0002521	leukocyte differentiation	-18.9069	122/564	Adam8,Bcl2,Bcl2a1d,Prdm1,Bmi1,Zfp36l1,C1qc,Runx3,Ctla4,Cd28,Cd3d,Cd3g,Cd83,Cd8a,Cdh17,Cdk6,Cebpb,Ccr1,Ccr7,Csf1,Egr1,Eomes,Epha2,Flt3,Fos,Fzd5,Fzd7,Gab2,Gas6,Gata3,Gpc3,H2-Aa,H2-Ab1,H2-Oa,Hmgb3,Ifng,Cd74,Il12b,Il1b,Il18r1,Il2ra,Il4ra,Il6,Il7r,Gimap1,Itk,Jag2,Jun,Junb,Kit,Mafb,Lck,Lef1,Lif,Loxl3,Smad7,Mertk,Kitl,Mmp14,Clec4d,Cited2,Myb,Myc,Med1,Pparg,Ptger4,Rasgrp1,Rbp1,Ccl3,Ccl5,Sox4,Tcf7,Zeb1,Tn…
1_Member	GO Biological Processes	GO:0022409	positive regulation of cell-cell adhesion	-18.4036	70/238	Adam8,Aif1,Bmi1,Cav1,Runx3,Cd28,Cd5,Cd6,Cd80,Cd83,Cd86,Cdh1,Ccr5,Ccr7,Dpp4,Gata3,Pdpn,H2-Aa,H2-Ab1,Hes1,Ifng,Igf1,Igfbp2,Cd74,Il12b,Il12rb1,Il1b,Il2ra,Il4ra,Il6,Il7r,Itga6,Lck,Lef1,Smad7,Cited2,Myb,Nr4a3,Prkcq,Ptafr,Rasgrp1,Rela,Ccl2,Ccl5,Cx3cl1,Tnf,Cd27,Tnfsf9,Tfrc,Tnfsf4,Vcam1,Zap70,Ets1,Elane,Icosl,Icos,Cd160,Lgals8,Pdcd1lg2,Cd274,Skap1,Nfkbiz,Cd276,Il1rl2,Card11,Pawr,Cd209e,Havcr2,Nfkbid,Rasa…
1_Member	GO Biological Processes	GO:1903039	positive regulation of leukocyte cell-cell adhesion	-17.6213	62/200	Adam8,Aif1,Bmi1,Cav1,Runx3,Cd28,Cd5,Cd6,Cd80,Cd83,Cd86,Ccr7,Dpp4,Gata3,H2-Aa,H2-Ab1,Hes1,Ifng,Igf1,Igfbp2,Cd74,Il12b,Il12rb1,Il1b,Il2ra,Il4ra,Il6,Il7r,Lck,Myb,Nr4a3,Prkcq,Ptafr,Rasgrp1,Rela,Ccl2,Ccl5,Tnf,Cd27,Tnfsf9,Tfrc,Tnfsf4,Vcam1,Zap70,Ets1,Elane,Icosl,Icos,Cd160,Lgals8,Pdcd1lg2,Cd274,Skap1,Nfkbiz,Cd276,Il1rl2,Card11,Pawr,Cd209e,Havcr2,Nfkbid,Rasal3
1_Member	GO Biological Processes	GO:0002694	regulation of leukocyte activation	-16.1803	128/652	Adam8,Aif1,Arg1,Arg2,Slc7a2,Bcl2,Prdm1,Bmi1,Zfp36l1,C1qa,C5ar1,Cav1,Runx3,Ctla4,Cd22,Cd28,Cd38,Cd5,Cd6,Cd80,Cd81,Cd83,Cd86,Cdkn1a,Cebpb,Ccr7,Dpp4,Fer,Flt3,Gab2,Gas6,Gata3,H2-Aa,H2-Ab1,H2-Oa,Hes1,Hmgb3,Ifng,Igf1,Igfbp2,Cd74,Il10,Il12b,Il12rb1,Il1b,Il2ra,Il4ra,Il6,Il7r,Lag3,Lamp1,Lat,Lck,Loxl3,Il1rl1,Smad7,Mertk,Mmp14,Cd200,Clec4d,Myb,Nr4a3,Prkcq,Pparg,Prnp,Ptafr,Nectin2,Rasgrp1,Ccl2,Ccl5,Cx3cl1,St…
1_Member	GO Biological Processes	GO:0050863	regulation of T cell activation	-16.1319	77/303	Adam8,Aif1,Arg1,Arg2,Prdm1,Bmi1,Cav1,Runx3,Ctla4,Cd28,Cd5,Cd6,Cd80,Cd83,Cd86,Cebpb,Ccr7,Dpp4,Gata3,H2-Aa,H2-Ab1,H2-Oa,Hes1,Ifng,Igf1,Igfbp2,Cd74,Il12b,Il12rb1,Il1b,Il2ra,Il4ra,Il6,Il7r,Lag3,Lat,Lck,Loxl3,Smad7,Myb,Prkcq,Prnp,Rasgrp1,Ccl2,Ccl5,Sdc4,Zeb1,Cd27,Tnfsf9,Tfrc,Tnfsf4,Vcam1,Zap70,Icosl,Icos,Cd160,Lgals8,Zc3h8,Tbx21,Pdcd1lg2,Cd274,Twsg1,Dusp3,Nfkbiz,Gpnmb,Cd276,Il1rl2,Card11,Pawr,Cd209e,Cd…
1_Member	GO Biological Processes	GO:0030217	T cell differentiation	-15.3854	70/268	Adam8,Bcl2,Bcl2a1d,Prdm1,Bmi1,Zfp36l1,Runx3,Ctla4,Cd28,Cd3d,Cd3g,Cd83,Cd8a,Cdk6,Ccr7,Egr1,Eomes,Flt3,Fzd5,Fzd7,Gata3,H2-Aa,H2-Oa,Ifng,Cd74,Il12b,Il1b,Il18r1,Il2ra,Il4ra,Il6,Il7r,Gimap1,Itk,Jag2,Kit,Mafb,Lck,Lef1,Loxl3,Smad7,Clec4d,Myb,Ptger4,Rasgrp1,Sox4,Tcf7,Zeb1,Cd27,Tnfsf8,Tnfsf9,Tnfsf4,Zap70,Gadd45g,Slamf6,Dll4,Clec4e,Zc3h8,Tbx21,Bcl11b,Rhoh,Nfkbiz,Il1rl2,Wwp1,Jmjd6,Card11,Themis,Ankle1,Nfkbi…
1_Member	GO Biological Processes	GO:1903708	positive regulation of hemopoiesis	-15.0259	59/206	Adam8,Prdm1,Bmi1,Zfp36l1,Runx3,Cd83,Ccr1,Ccr7,Csf1,Fos,Gas6,Gata3,H2-Aa,Hif1a,Ifng,Cd74,Il12b,Il1b,Il2ra,Il4ra,Il6,Il7r,Inhba,Jag1,Jun,Lck,Lef1,Lif,Kitl,Mmp14,Myb,Med1,Rasgrp1,Scin,Ccl3,Ccl5,Tnf,Cd27,Tnfsf9,Tnfsf4,Zap70,Ets1,Axl,Gsk3b,Tesc,Zbtb46,Ocstamp,Dcstamp,Nfkbiz,Smap1,Kdm1a,Tmem64,Il1rl2,Trib1,Rcor1,Rab7b,Gpr68,Nfkbid,Cd101
1_Member	GO Biological Processes	GO:1903706	regulation of hemopoiesis	-14.4811	89/403	Adam8,Prdm1,Bmi1,Zfp36l1,C1qc,Runx3,Ctla4,Cd28,Cd83,Cdk6,Cebpb,Ccr1,Ccr7,Csf1,Flt3,Fos,Gas6,Gata3,H2-Aa,H2-Oa,Hes1,Hif1a,Hmgb3,Ifng,Cd74,Il12b,Il1b,Il2ra,Il4ra,Il6,Il7r,Inhba,Jag1,Jun,Kdr,Mafb,Lck,Ldb1,Lef1,Lif,Loxl3,Smad7,Kitl,Mmp14,Myb,Myc,Nfkbia,Pim1,Med1,Rasgrp1,Rbp1,Scin,Ccl3,Ccl5,Zeb1,Tnf,Cd27,Tnfsf9,Tnfsf4,Zap70,Ikzf3,Ets1,Axl,Klf13,Gsk3b,Zc3h8,Tbx21,Tesc,Zbtb46,Ocstamp,Dcstamp,Ncapg2,Pus7…
1_Member	GO Biological Processes	GO:0070663	regulation of leukocyte proliferation	-14.206	63/238	Aif1,Arg1,Arg2,Bcl2,Prdm1,Bmi1,Ctla4,Cd22,Cd28,Cd38,Cd6,Cd80,Cd81,Cd86,Cdkn1a,Cebpb,Ccr7,Csf1,H2-Aa,H2-Ab1,Hes1,Ifng,Igf1,Igfbp2,Cd74,Il10,Il12b,Il12rb1,Il1b,Il2ra,Il6,Kitl,Prkcq,Prnp,Ccl12,Ccl5,Sdc4,Tnfsf9,Tfrc,Tnfrsf4,Tnfsf4,Vcam1,Zap70,Ikzf3,Icosl,Gsk3b,Clcf1,Vav3,Pdcd1lg2,Cd274,Twsg1,Ocstamp,Gpnmb,Cd276,Card11,Pawr,Cd209e,Cd209a,Havcr2,Siglecg,Rasal3,Pkn1,Irs2
1_Member	GO Biological Processes	GO:0050870	positive regulation of T cell activation	-14.1912	54/185	Adam8,Aif1,Bmi1,Cav1,Runx3,Cd28,Cd5,Cd6,Cd80,Cd83,Cd86,Ccr7,Dpp4,Gata3,H2-Aa,H2-Ab1,Hes1,Ifng,Igf1,Igfbp2,Cd74,Il12b,Il12rb1,Il1b,Il2ra,Il4ra,Il6,Il7r,Lck,Myb,Prkcq,Rasgrp1,Ccl2,Ccl5,Cd27,Tnfsf9,Tfrc,Tnfsf4,Vcam1,Zap70,Icosl,Icos,Cd160,Lgals8,Pdcd1lg2,Cd274,Nfkbiz,Cd276,Il1rl2,Card11,Cd209e,Havcr2,Nfkbid,Rasal3
1_Member	GO Biological Processes	GO:1902107	positive regulation of leukocyte differentiation	-13.1471	49/166	Adam8,Prdm1,Bmi1,Zfp36l1,Runx3,Cd83,Ccr1,Ccr7,Csf1,Fos,Gas6,Gata3,H2-Aa,Ifng,Cd74,Il12b,Il1b,Il2ra,Il4ra,Il6,Il7r,Jun,Lck,Lef1,Lif,Kitl,Mmp14,Myb,Rasgrp1,Ccl3,Ccl5,Tnf,Cd27,Tnfsf9,Tnfsf4,Zap70,Axl,Gsk3b,Tesc,Zbtb46,Ocstamp,Dcstamp,Nfkbiz,Tmem64,Il1rl2,Trib1,Gpr68,Nfkbid,Cd101
1_Member	GO Biological Processes	GO:0070661	leukocyte proliferation	-12.969	75/330	Aif1,Arg1,Arg2,Bcl2,Prdm1,Bmi1,Ctla4,Cd22,Cd28,Cd38,Cd6,Cd80,Cd81,Cd86,Cdkn1a,Cebpb,Cxcr4,Ccr7,Csf1,Flt3,Fyn,Gja1,H2-Aa,H2-Ab1,Hes1,Ifng,Igf1,Igfbp2,Cd74,Il10,Il12b,Il12rb1,Il1b,Il2ra,Il6,Il7r,Itgax,Lef1,Kitl,Prkcq,Prnp,Ccl12,Ccl5,Cx3cl1,Sdc4,Cd27,Tnfsf9,Tfrc,Tnfrsf4,Tnfsf4,Vcam1,Zap70,Ikzf3,Slamf6,Icosl,Ctps,Gsk3b,Clcf1,Vav3,Pdcd1lg2,Cd274,Twsg1,Ocstamp,Gpnmb,Cd276,Card11,Pawr,Cd209e,Cd209a,Havc…
1_Member	GO Biological Processes	GO:0032944	regulation of mononuclear cell proliferation	-12.9688	59/227	Aif1,Arg1,Arg2,Bcl2,Prdm1,Bmi1,Ctla4,Cd22,Cd28,Cd38,Cd6,Cd80,Cd81,Cd86,Cdkn1a,Cebpb,Ccr7,Csf1,H2-Aa,H2-Ab1,Hes1,Ifng,Igf1,Igfbp2,Cd74,Il10,Il12b,Il12rb1,Il1b,Il2ra,Il6,Prkcq,Prnp,Ccl5,Sdc4,Tnfsf9,Tfrc,Tnfrsf4,Tnfsf4,Vcam1,Zap70,Ikzf3,Icosl,Clcf1,Vav3,Pdcd1lg2,Cd274,Twsg1,Gpnmb,Cd276,Card11,Pawr,Cd209e,Cd209a,Havcr2,Siglecg,Rasal3,Pkn1,Irs2
1_Member	GO Biological Processes	GO:1902105	regulation of leukocyte differentiation	-12.7672	69/293	Adam8,Prdm1,Bmi1,Zfp36l1,C1qc,Runx3,Ctla4,Cd28,Cd83,Cdk6,Cebpb,Ccr1,Ccr7,Csf1,Flt3,Fos,Gas6,Gata3,H2-Aa,H2-Oa,Hmgb3,Ifng,Cd74,Il12b,Il1b,Il2ra,Il4ra,Il6,Il7r,Jun,Mafb,Lck,Lef1,Lif,Loxl3,Smad7,Kitl,Mmp14,Myb,Myc,Rasgrp1,Rbp1,Ccl3,Ccl5,Zeb1,Tnf,Cd27,Tnfsf9,Tnfsf4,Zap70,Ikzf3,Axl,Gsk3b,Zc3h8,Tbx21,Tesc,Zbtb46,Ocstamp,Dcstamp,Nfkbiz,Tmem64,Il1rl2,Card11,Trib1,Ankle1,Inpp4b,Gpr68,Nfkbid,Cd101
1_Member	GO Biological Processes	GO:0050670	regulation of lymphocyte proliferation	-12.5946	58/225	Aif1,Arg1,Arg2,Bcl2,Prdm1,Bmi1,Ctla4,Cd22,Cd28,Cd38,Cd6,Cd80,Cd81,Cd86,Cdkn1a,Cebpb,Ccr7,H2-Aa,H2-Ab1,Hes1,Ifng,Igf1,Igfbp2,Cd74,Il10,Il12b,Il12rb1,Il1b,Il2ra,Il6,Prkcq,Prnp,Ccl5,Sdc4,Tnfsf9,Tfrc,Tnfrsf4,Tnfsf4,Vcam1,Zap70,Ikzf3,Icosl,Clcf1,Vav3,Pdcd1lg2,Cd274,Twsg1,Gpnmb,Cd276,Card11,Pawr,Cd209e,Cd209a,Havcr2,Siglecg,Rasal3,Pkn1,Irs2
1_Member	GO Biological Processes	GO:0051249	regulation of lymphocyte activation	-12.5602	106/557	Adam8,Aif1,Arg1,Arg2,Bcl2,Prdm1,Bmi1,Zfp36l1,Cav1,Runx3,Ctla4,Cd22,Cd28,Cd38,Cd5,Cd6,Cd80,Cd81,Cd83,Cd86,Cdkn1a,Cebpb,Ccr7,Dpp4,Flt3,Gas6,Gata3,H2-Aa,H2-Ab1,H2-Oa,Hes1,Hmgb3,Ifng,Igf1,Igfbp2,Cd74,Il10,Il12b,Il12rb1,Il1b,Il2ra,Il4ra,Il6,Il7r,Lag3,Lamp1,Lat,Lck,Loxl3,Smad7,Mertk,Mmp14,Myb,Prkcq,Prnp,Rasgrp1,Ccl2,Ccl5,Sdc4,Zeb1,Tnfaip3,Cd27,Tnfsf9,Tfrc,Tnfrsf4,Tnfsf4,Vcam1,Zap70,Ikzf3,Axl,Trp53bp1,I…
1_Member	GO Biological Processes	GO:0030098	lymphocyte differentiation	-12.418	83/393	Adam8,Bcl2,Bcl2a1d,Prdm1,Bmi1,Zfp36l1,Runx3,Ctla4,Cd28,Cd3d,Cd3g,Cd83,Cd8a,Cdh17,Cdk6,Ccr7,Egr1,Eomes,Flt3,Fzd5,Fzd7,Gas6,Gata3,H2-Aa,H2-Ab1,H2-Oa,Hmgb3,Ifng,Cd74,Il12b,Il1b,Il18r1,Il2ra,Il4ra,Il6,Il7r,Gimap1,Itk,Jag2,Kit,Mafb,Lck,Lef1,Loxl3,Smad7,Mertk,Mmp14,Clec4d,Myb,Ptger4,Rasgrp1,Sox4,Tcf7,Zeb1,Tnfaip3,Cd27,Tnfsf8,Tnfsf9,Tnfsf4,Zap70,Ikzf3,Gadd45g,Axl,Slamf6,Dll4,Adgrg3,Lgals8,Clec4e,Clcf1,Z…
1_Member	GO Biological Processes	GO:0070665	positive regulation of leukocyte proliferation	-12.3389	44/145	Aif1,Bcl2,Bmi1,Cd28,Cd38,Cd6,Cd80,Cd81,Cd86,Cdkn1a,Ccr7,Csf1,Hes1,Ifng,Igf1,Igfbp2,Cd74,Il12b,Il12rb1,Il1b,Il2ra,Il6,Kitl,Prkcq,Ccl5,Tnfsf9,Tfrc,Tnfrsf4,Tnfsf4,Vcam1,Zap70,Icosl,Gsk3b,Clcf1,Vav3,Pdcd1lg2,Cd274,Ocstamp,Cd276,Card11,Cd209e,Havcr2,Rasal3,Irs2
1_Member	GO Biological Processes	GO:0050867	positive regulation of cell activation	-12.1295	92/462	Adam8,Aif1,Bcl2,Prdm1,Bmi1,C1qa,Capn3,Cav1,Runx3,Cd28,Cd38,Cd5,Cd6,Cd80,Cd81,Cd83,Cd86,Cdkn1a,Ccr7,Dgat1,Dpp4,Ccn2,Gab2,Gas6,Gata3,Pdpn,H2-Aa,H2-Ab1,Hes1,Ifng,Igf1,Igfbp2,Cd74,Il10,Il12b,Il12rb1,Il1b,Il2ra,Il4ra,Il6,Il7r,Jak2,Lamp1,Lck,Il1rl1,Mmp14,Clec4d,Myb,Nr4a3,Pdgfb,Prkcq,Ptafr,Nectin2,Rasgrp1,Ccl2,Ccl5,Stxbp1,Thbs1,Cd27,Tnfsf9,Tfrc,Tnfrsf4,Tnfsf4,Vcam1,Zap70,Axl,Klrk1,Trp53bp1,Icosl,Icos,Cd…
1_Member	GO Biological Processes	GO:0032943	mononuclear cell proliferation	-12.0038	70/310	Aif1,Arg1,Arg2,Bcl2,Prdm1,Bmi1,Ctla4,Cd22,Cd28,Cd38,Cd6,Cd80,Cd81,Cd86,Cdkn1a,Cebpb,Cxcr4,Ccr7,Csf1,Flt3,Fyn,Gja1,H2-Aa,H2-Ab1,Hes1,Ifng,Igf1,Igfbp2,Cd74,Il10,Il12b,Il12rb1,Il1b,Il2ra,Il6,Il7r,Itgax,Lef1,Prkcq,Prnp,Ccl5,Sdc4,Cd27,Tnfsf9,Tfrc,Tnfrsf4,Tnfsf4,Vcam1,Zap70,Ikzf3,Slamf6,Icosl,Ctps,Clcf1,Vav3,Pdcd1lg2,Cd274,Twsg1,Gpnmb,Cd276,Card11,Pawr,Cd209e,Cd209a,Havcr2,Siglecg,Rasal3,Pkn1,Itgad,Irs2
1_Member	GO Biological Processes	GO:0046651	lymphocyte proliferation	-11.6705	69/308	Aif1,Arg1,Arg2,Bcl2,Prdm1,Bmi1,Ctla4,Cd22,Cd28,Cd38,Cd6,Cd80,Cd81,Cd86,Cdkn1a,Cebpb,Cxcr4,Ccr7,Flt3,Fyn,Gja1,H2-Aa,H2-Ab1,Hes1,Ifng,Igf1,Igfbp2,Cd74,Il10,Il12b,Il12rb1,Il1b,Il2ra,Il6,Il7r,Itgax,Lef1,Prkcq,Prnp,Ccl5,Sdc4,Cd27,Tnfsf9,Tfrc,Tnfrsf4,Tnfsf4,Vcam1,Zap70,Ikzf3,Slamf6,Icosl,Ctps,Clcf1,Vav3,Pdcd1lg2,Cd274,Twsg1,Gpnmb,Cd276,Card11,Pawr,Cd209e,Cd209a,Havcr2,Siglecg,Rasal3,Pkn1,Itgad,Irs2
1_Member	GO Biological Processes	GO:0032946	positive regulation of mononuclear cell proliferation	-11.2147	41/138	Aif1,Bcl2,Bmi1,Cd28,Cd38,Cd6,Cd80,Cd81,Cd86,Cdkn1a,Ccr7,Csf1,Hes1,Ifng,Igf1,Igfbp2,Cd74,Il12b,Il12rb1,Il1b,Il2ra,Il6,Prkcq,Ccl5,Tnfsf9,Tfrc,Tnfrsf4,Tnfsf4,Vcam1,Zap70,Icosl,Clcf1,Vav3,Pdcd1lg2,Cd274,Cd276,Card11,Cd209e,Havcr2,Rasal3,Irs2
1_Member	GO Biological Processes	GO:0050671	positive regulation of lymphocyte proliferation	-10.8057	40/136	Aif1,Bcl2,Bmi1,Cd28,Cd38,Cd6,Cd80,Cd81,Cd86,Cdkn1a,Ccr7,Hes1,Ifng,Igf1,Igfbp2,Cd74,Il12b,Il12rb1,Il1b,Il2ra,Il6,Prkcq,Ccl5,Tnfsf9,Tfrc,Tnfrsf4,Tnfsf4,Vcam1,Zap70,Icosl,Clcf1,Vav3,Pdcd1lg2,Cd274,Cd276,Card11,Cd209e,Havcr2,Rasal3,Irs2
1_Member	GO Biological Processes	GO:0042098	T cell proliferation	-10.0134	50/205	Aif1,Arg1,Arg2,Bmi1,Ctla4,Cd28,Cd6,Cd80,Cd86,Cebpb,Cxcr4,Ccr7,Fyn,Gja1,H2-Aa,H2-Ab1,Hes1,Ifng,Igf1,Igfbp2,Il12b,Il12rb1,Il1b,Il2ra,Il6,Itgax,Prkcq,Prnp,Ccl5,Sdc4,Tnfsf9,Tfrc,Tnfrsf4,Tnfsf4,Vcam1,Zap70,Icosl,Ctps,Pdcd1lg2,Cd274,Twsg1,Gpnmb,Cd276,Card11,Pawr,Cd209e,Cd209a,Havcr2,Rasal3,Itgad
1_Member	GO Biological Processes	GO:0002696	positive regulation of leukocyte activation	-9.78507	84/447	Adam8,Aif1,Bcl2,Prdm1,Bmi1,C1qa,Cav1,Runx3,Cd28,Cd38,Cd5,Cd6,Cd80,Cd81,Cd83,Cd86,Cdkn1a,Ccr7,Dpp4,Gab2,Gas6,Gata3,H2-Aa,H2-Ab1,Hes1,Ifng,Igf1,Igfbp2,Cd74,Il10,Il12b,Il12rb1,Il1b,Il2ra,Il4ra,Il6,Il7r,Lamp1,Lck,Il1rl1,Mmp14,Clec4d,Myb,Nr4a3,Prkcq,Ptafr,Nectin2,Rasgrp1,Ccl2,Ccl5,Stxbp1,Thbs1,Cd27,Tnfsf9,Tfrc,Tnfrsf4,Tnfsf4,Vcam1,Zap70,Axl,Klrk1,Trp53bp1,Icosl,Icos,Cd160,Paxip1,Lgals8,Clcf1,Vav3,Tbx2…
1_Member	GO Biological Processes	GO:0042102	positive regulation of T cell proliferation	-9.52473	31/97	Aif1,Bmi1,Cd28,Cd6,Cd80,Cd86,Ccr7,Hes1,Ifng,Igf1,Igfbp2,Il12b,Il12rb1,Il1b,Il2ra,Il6,Prkcq,Ccl5,Tnfsf9,Tfrc,Tnfsf4,Vcam1,Zap70,Icosl,Pdcd1lg2,Cd274,Cd276,Card11,Cd209e,Havcr2,Rasal3
1_Member	GO Biological Processes	GO:0042129	regulation of T cell proliferation	-9.32284	43/169	Aif1,Arg1,Arg2,Bmi1,Ctla4,Cd28,Cd6,Cd80,Cd86,Cebpb,Ccr7,H2-Aa,H2-Ab1,Hes1,Ifng,Igf1,Igfbp2,Il12b,Il12rb1,Il1b,Il2ra,Il6,Prkcq,Prnp,Ccl5,Sdc4,Tnfsf9,Tfrc,Tnfsf4,Vcam1,Zap70,Icosl,Pdcd1lg2,Cd274,Twsg1,Gpnmb,Cd276,Card11,Pawr,Cd209e,Cd209a,Havcr2,Rasal3
1_Member	GO Biological Processes	GO:0051251	positive regulation of lymphocyte activation	-7.8997	72/395	Adam8,Aif1,Bcl2,Prdm1,Bmi1,Cav1,Runx3,Cd28,Cd38,Cd5,Cd6,Cd80,Cd81,Cd83,Cd86,Cdkn1a,Ccr7,Dpp4,Gas6,Gata3,H2-Aa,H2-Ab1,Hes1,Ifng,Igf1,Igfbp2,Cd74,Il12b,Il12rb1,Il1b,Il2ra,Il4ra,Il6,Il7r,Lamp1,Lck,Mmp14,Myb,Prkcq,Rasgrp1,Ccl2,Ccl5,Cd27,Tnfsf9,Tfrc,Tnfrsf4,Tnfsf4,Vcam1,Zap70,Axl,Trp53bp1,Icosl,Icos,Cd160,Paxip1,Lgals8,Clcf1,Vav3,Tbx21,Pdcd1lg2,Cd274,Ulbp1,Nfkbiz,Cd276,Il1rl2,Nsd2,Card11,Cd209e,Havcr2…
1_Member	GO Biological Processes	GO:0045619	regulation of lymphocyte differentiation	-7.76405	42/182	Adam8,Prdm1,Bmi1,Zfp36l1,Runx3,Ctla4,Cd28,Cd83,Ccr7,Flt3,Gas6,Gata3,H2-Aa,H2-Oa,Hmgb3,Ifng,Cd74,Il1b,Il2ra,Il4ra,Il6,Il7r,Lck,Loxl3,Smad7,Mmp14,Myb,Rasgrp1,Zeb1,Cd27,Tnfsf9,Tnfsf4,Zap70,Ikzf3,Axl,Zc3h8,Tbx21,Nfkbiz,Il1rl2,Card11,Ankle1,Nfkbid
1_Member	GO Biological Processes	GO:0045580	regulation of T cell differentiation	-6.70867	35/150	Adam8,Prdm1,Bmi1,Runx3,Ctla4,Cd28,Cd83,Ccr7,Gata3,H2-Aa,H2-Oa,Ifng,Cd74,Il1b,Il2ra,Il4ra,Il6,Il7r,Lck,Loxl3,Smad7,Myb,Rasgrp1,Zeb1,Cd27,Tnfsf9,Tnfsf4,Zap70,Zc3h8,Tbx21,Nfkbiz,Il1rl2,Card11,Ankle1,Nfkbid
1_Member	GO Biological Processes	GO:0045621	positive regulation of lymphocyte differentiation	-6.58214	28/107	Adam8,Prdm1,Bmi1,Runx3,Cd83,Ccr7,Gas6,Gata3,H2-Aa,Ifng,Cd74,Il1b,Il2ra,Il4ra,Il6,Il7r,Lck,Mmp14,Myb,Rasgrp1,Cd27,Tnfsf9,Tnfsf4,Zap70,Axl,Nfkbiz,Il1rl2,Nfkbid
1_Member	GO Biological Processes	GO:0045582	positive regulation of T cell differentiation	-5.53075	24/94	Adam8,Bmi1,Runx3,Cd83,Ccr7,Gata3,H2-Aa,Ifng,Cd74,Il1b,Il2ra,Il4ra,Il6,Il7r,Lck,Myb,Rasgrp1,Cd27,Tnfsf9,Tnfsf4,Zap70,Nfkbiz,Il1rl2,Nfkbid
2_Summary	GO Biological Processes	GO:0001944	vasculature development	-28.3345	169/750	Adam8,Adamts1,Angpt2,Akt1,Apoe,Nr2f2,Prdm1,Bmpr1a,Zfp36l1,Btg1,C3ar1,C5ar1,Cav1,Cd34,Cd36,Chil1,Socs3,Cxcr4,Ackr3,Camp,Col18a1,Col4a1,Col4a2,Ddit3,S1pr1,Ednra,Egr1,Epha2,Ephb3,Epn2,Eya1,F3,Ptk2,Fasl,Fgf1,Fgfr1,Ccn2,Foxm1,Folr1,Fosl1,Fzd5,Gab1,B4galt1,Gja1,Pdpn,Gpc3,Adgrg1,Hbegf,Hes1,Hif1a,Nr4a1,Cxcl10,Ifng,Igf1,Ccn1,Il10,Il1a,Il1b,Jag1,Jun,Junb,Jup,Kdr,Kit,Lama4,Anpep,Lef1,Lif,Smad6,Smad7,Cma1,Md…
2_Member	GO Biological Processes	GO:0001944	vasculature development	-28.3345	169/750	Adam8,Adamts1,Angpt2,Akt1,Apoe,Nr2f2,Prdm1,Bmpr1a,Zfp36l1,Btg1,C3ar1,C5ar1,Cav1,Cd34,Cd36,Chil1,Socs3,Cxcr4,Ackr3,Camp,Col18a1,Col4a1,Col4a2,Ddit3,S1pr1,Ednra,Egr1,Epha2,Ephb3,Epn2,Eya1,F3,Ptk2,Fasl,Fgf1,Fgfr1,Ccn2,Foxm1,Folr1,Fosl1,Fzd5,Gab1,B4galt1,Gja1,Pdpn,Gpc3,Adgrg1,Hbegf,Hes1,Hif1a,Nr4a1,Cxcl10,Ifng,Igf1,Ccn1,Il10,Il1a,Il1b,Jag1,Jun,Junb,Jup,Kdr,Kit,Lama4,Anpep,Lef1,Lif,Smad6,Smad7,Cma1,Md…
2_Member	GO Biological Processes	GO:0072358	cardiovascular system development	-27.8962	170/763	Adam8,Adamts1,Angpt2,Akt1,Speg,Apoe,Nr2f2,Prdm1,Bmpr1a,Zfp36l1,Btg1,C3ar1,C5ar1,Cav1,Cd34,Cd36,Chil1,Socs3,Cxcr4,Ackr3,Camp,Col18a1,Col4a1,Col4a2,Ddit3,S1pr1,Ednra,Egr1,Epha2,Ephb3,Epn2,Eya1,F3,Ptk2,Fasl,Fgf1,Fgfr1,Ccn2,Foxm1,Folr1,Fosl1,Fzd5,Gab1,B4galt1,Gja1,Pdpn,Gpc3,Adgrg1,Hbegf,Hes1,Hif1a,Nr4a1,Cxcl10,Ifng,Igf1,Ccn1,Il10,Il1a,Il1b,Jag1,Jun,Junb,Jup,Kdr,Kit,Lama4,Anpep,Lef1,Lif,Smad6,Smad7,Cm…
2_Member	GO Biological Processes	GO:0001568	blood vessel development	-26.7288	161/718	Adam8,Adamts1,Angpt2,Akt1,Apoe,Nr2f2,Prdm1,Bmpr1a,Zfp36l1,Btg1,C3ar1,C5ar1,Cav1,Cd34,Cd36,Chil1,Socs3,Cxcr4,Ackr3,Camp,Col18a1,Col4a1,Col4a2,Ddit3,S1pr1,Ednra,Egr1,Epha2,Ephb3,Epn2,Eya1,F3,Ptk2,Fasl,Fgf1,Fgfr1,Ccn2,Foxm1,Folr1,Fosl1,Fzd5,Gab1,B4galt1,Gja1,Gpc3,Adgrg1,Hbegf,Hes1,Hif1a,Nr4a1,Cxcl10,Ifng,Ccn1,Il10,Il1a,Il1b,Jag1,Jun,Junb,Jup,Kdr,Lama4,Anpep,Lef1,Lif,Smad6,Smad7,Cma1,Mdm2,Mmp2,Cited2…
2_Member	GO Biological Processes	GO:0048514	blood vessel morphogenesis	-26.0957	145/619	Adam8,Adamts1,Angpt2,Akt1,Apoe,Nr2f2,Prdm1,Bmpr1a,Zfp36l1,Btg1,C3ar1,C5ar1,Cav1,Cd34,Cd36,Chil1,Cxcr4,Ackr3,Camp,Col18a1,Col4a1,Col4a2,S1pr1,Ednra,Epha2,Ephb3,Epn2,Eya1,F3,Ptk2,Fasl,Fgf1,Fgfr1,Ccn2,Foxm1,Folr1,Fzd5,Gab1,B4galt1,Gja1,Adgrg1,Hbegf,Hes1,Hif1a,Nr4a1,Cxcl10,Ccn1,Il10,Il1a,Il1b,Jag1,Jun,Junb,Jup,Kdr,Anpep,Lef1,Lif,Smad6,Smad7,Cma1,Mmp2,Cited2,Nedd4,Notch4,Nrp2,Pde3b,Pdgfa,Pdgfb,Enpp2,P…
2_Member	GO Biological Processes	GO:0001525	angiogenesis	-19.7356	116/511	Adam8,Adamts1,Angpt2,Akt1,Btg1,C3ar1,C5ar1,Cav1,Cd34,Cd36,Chil1,Cxcr4,Ackr3,Camp,Col18a1,Col4a1,Col4a2,S1pr1,Ednra,Epha2,Ephb3,Epn2,F3,Ptk2,Fasl,Fgf1,Fgfr1,Ccn2,Fzd5,Gab1,B4galt1,Adgrg1,Hbegf,Hif1a,Nr4a1,Cxcl10,Ccn1,Il10,Il1a,Il1b,Jun,Jup,Kdr,Anpep,Lef1,Lif,Cma1,Mmp2,Notch4,Nrp2,Pde3b,Pdgfa,Enpp2,Pecam1,Prkcb,Serpine1,Plau,Plcd1,Plcg1,Med1,Pparg,Ptgs2,Ptn,Ptprm,Rock2,Ccl12,Ccl2,Ccl5,Cx3cl1,Serpin…
2_Member	GO Biological Processes	GO:1901342	regulation of vasculature development	-11.4876	73/338	Adamts1,Angpt2,Btg1,C3ar1,C5ar1,Cd34,Cd36,Chil1,Cxcr4,Camp,Col4a2,Egr1,Epha2,Epn2,F3,Fasl,Fgf1,Gab1,Hif1a,Cxcl10,Ifng,Il10,Il1a,Il1b,Jup,Kdr,Kit,Lif,Cma1,Notch4,Pde3b,Pdgfb,Enpp2,Prkcb,Serpine1,Plcg1,Pparg,Ptger4,Ptgs2,Ptn,Ptprm,Rock2,Ccl2,Ccl5,Cx3cl1,Serpinf1,Plk2,Sparc,Sphk1,Tgfb2,Thbs1,Thbs2,Vegfb,Ets1,Spry2,Map3k3,Creb3l1,Tnfrsf12a,Reck,Cd160,Dll4,Ccl24,Asb4,Rgcc,Tmem100,Ecscr,Rapgef2,Spred1,…
2_Member	GO Biological Processes	GO:0045765	regulation of angiogenesis	-10.1028	65/304	Adamts1,Angpt2,Btg1,C3ar1,C5ar1,Cd34,Cd36,Chil1,Cxcr4,Camp,Col4a2,Epha2,Epn2,F3,Fasl,Fgf1,Gab1,Hif1a,Cxcl10,Il10,Il1a,Il1b,Jup,Kdr,Lif,Cma1,Notch4,Pde3b,Enpp2,Prkcb,Serpine1,Plcg1,Pparg,Ptgs2,Ptn,Ptprm,Rock2,Ccl2,Ccl5,Cx3cl1,Serpinf1,Plk2,Sparc,Sphk1,Tgfb2,Thbs1,Thbs2,Vegfb,Ets1,Spry2,Map3k3,Creb3l1,Tnfrsf12a,Reck,Cd160,Dll4,Ccl24,Rgcc,Ecscr,Spred1,Tlr3,Stab1,Ppp1r16b,Adgrb2,Stard13
2_Member	GO Biological Processes	GO:2000181	negative regulation of blood vessel morphogenesis	-8.62679	33/116	Adamts1,Angpt2,Cd36,Col4a2,Epha2,Epn2,Fasl,Cxcl10,Lif,Pde3b,Serpine1,Pparg,Ptger4,Ptn,Ptprm,Rock2,Ccl2,Serpinf1,Plk2,Sparc,Tgfb2,Thbs1,Thbs2,Spry2,Creb3l1,Cd160,Dll4,Rgcc,Ecscr,Spred1,Stab1,Adgrb2,Stard13
2_Member	GO Biological Processes	GO:1901343	negative regulation of vasculature development	-8.60289	35/128	Adamts1,Angpt2,Cd36,Col4a2,Epha2,Epn2,Fasl,Cxcl10,Ifng,Lif,Pde3b,Pdgfb,Serpine1,Pparg,Ptger4,Ptn,Ptprm,Rock2,Ccl2,Serpinf1,Plk2,Sparc,Tgfb2,Thbs1,Thbs2,Spry2,Creb3l1,Cd160,Dll4,Rgcc,Ecscr,Spred1,Stab1,Adgrb2,Stard13
2_Member	GO Biological Processes	GO:0016525	negative regulation of angiogenesis	-8.4373	32/112	Adamts1,Angpt2,Cd36,Col4a2,Epha2,Epn2,Fasl,Cxcl10,Lif,Pde3b,Serpine1,Pparg,Ptn,Ptprm,Rock2,Ccl2,Serpinf1,Plk2,Sparc,Tgfb2,Thbs1,Thbs2,Spry2,Creb3l1,Cd160,Dll4,Rgcc,Ecscr,Spred1,Stab1,Adgrb2,Stard13
2_Member	GO Biological Processes	GO:1904018	positive regulation of vasculature development	-5.64002	40/201	Angpt2,Btg1,C3ar1,C5ar1,Cd34,Chil1,Cxcr4,Camp,Egr1,F3,Fgf1,Gab1,Hif1a,Il10,Il1a,Il1b,Jup,Kdr,Kit,Cma1,Notch4,Pdgfb,Prkcb,Serpine1,Plcg1,Ptgs2,Ccl5,Cx3cl1,Plk2,Sphk1,Thbs1,Vegfb,Ets1,Map3k3,Ccl24,Asb4,Tmem100,Rapgef2,Tlr3,Ppp1r16b
2_Member	GO Biological Processes	GO:0045766	positive regulation of angiogenesis	-4.30012	34/182	Angpt2,Btg1,C3ar1,C5ar1,Cd34,Chil1,Cxcr4,Camp,F3,Fgf1,Gab1,Hif1a,Il10,Il1a,Il1b,Jup,Kdr,Cma1,Notch4,Prkcb,Serpine1,Plcg1,Ptgs2,Ccl5,Cx3cl1,Plk2,Sphk1,Thbs1,Vegfb,Ets1,Map3k3,Ccl24,Tlr3,Ppp1r16b
3_Summary	GO Biological Processes	GO:0001816	cytokine production	-22.8526	155/734	Abca1,Acp5,Adam8,Aif1,Apod,Arg1,Arg2,C3ar1,C5ar1,Runx3,Cd14,Cd28,Cd34,Cd36,Cd247,Cd6,Cd83,Cebpb,Chil1,Ccr5,Ccr7,Cyp2j6,Ddit3,Egr1,Eomes,Epha2,Fbln1,Fgfr1,Flt3,Fzd5,Gas6,Gata3,Adgrg1,Hif1a,Hras,Htr2b,Ifng,Igf1,Cd74,Il10,Il12b,Il12rb1,Il18rap,Il1a,Il1b,Il1r2,Il1rn,Il18r1,Il4ra,Il6,Acod1,Itk,Jak2,F11r,Kit,Lag3,Lef1,Ltbp3,Ltf,Il1rl1,Smad7,Cma1,Mertk,Mmp12,Cd200,Gbp4,Nr4a3,Osm,P2ry2,Pde4b,Prkcq,Serpin…
3_Member	GO Biological Processes	GO:0001816	cytokine production	-22.8526	155/734	Abca1,Acp5,Adam8,Aif1,Apod,Arg1,Arg2,C3ar1,C5ar1,Runx3,Cd14,Cd28,Cd34,Cd36,Cd247,Cd6,Cd83,Cebpb,Chil1,Ccr5,Ccr7,Cyp2j6,Ddit3,Egr1,Eomes,Epha2,Fbln1,Fgfr1,Flt3,Fzd5,Gas6,Gata3,Adgrg1,Hif1a,Hras,Htr2b,Ifng,Igf1,Cd74,Il10,Il12b,Il12rb1,Il18rap,Il1a,Il1b,Il1r2,Il1rn,Il18r1,Il4ra,Il6,Acod1,Itk,Jak2,F11r,Kit,Lag3,Lef1,Ltbp3,Ltf,Il1rl1,Smad7,Cma1,Mertk,Mmp12,Cd200,Gbp4,Nr4a3,Osm,P2ry2,Pde4b,Prkcq,Serpin…
3_Member	GO Biological Processes	GO:0001817	regulation of cytokine production	-21.2203	141/661	Acp5,Adam8,Aif1,Apod,Arg1,Arg2,C3ar1,C5ar1,Cd14,Cd28,Cd34,Cd36,Cd6,Cd83,Cebpb,Ccr5,Ccr7,Cyp2j6,Ddit3,Egr1,Epha2,Fbln1,Fgfr1,Flt3,Fzd5,Gas6,Gata3,Hif1a,Hras,Htr2b,Ifng,Igf1,Cd74,Il10,Il12b,Il12rb1,Il1a,Il1b,Il1r2,Il1rn,Il18r1,Il4ra,Il6,Acod1,Jak2,F11r,Lag3,Lef1,Ltf,Il1rl1,Smad7,Mertk,Mmp12,Cd200,Gbp4,Nr4a3,Osm,P2ry2,Pde4b,Prkcq,Serpine1,Pparg,Prg2,Prnp,Ptafr,Ptger4,Ptgs2,Ptprs,Rac1,Rasgrp1,Rel,Rel…
3_Member	GO Biological Processes	GO:0001819	positive regulation of cytokine production	-15.5576	96/435	Adam8,Aif1,C3ar1,C5ar1,Cd14,Cd28,Cd34,Cd36,Cd6,Cd83,Cebpb,Ccr5,Ccr7,Cyp2j6,Ddit3,Egr1,Flt3,Fzd5,Gata3,Hif1a,Hras,Htr2b,Ifng,Cd74,Il10,Il12b,Il12rb1,Il1a,Il1b,Il1rn,Il18r1,Il4ra,Il6,Jak2,Il1rl1,Mmp12,Cd200,Nr4a3,Osm,P2ry2,Pde4b,Prkcq,Serpine1,Prg2,Ptafr,Ptger4,Ptgs2,Rasgrp1,Rel,Rela,Rock2,Ccl2,Ccl3,Ccl4,Ccl5,Cx3cl1,Thbs1,Tnf,Cd27,Tnfsf9,Tnfsf4,Wnt11,Tlr2,Klrk1,Slamf6,Elane,Icosl,Il27ra,Tlr5,Prg3,C…
3_Member	GO Biological Processes	GO:0001818	negative regulation of cytokine production	-13.6758	64/250	Acp5,Apod,Arg1,Arg2,Cd34,Cd83,Epha2,Fbln1,Fgfr1,Flt3,Gas6,Gata3,Ifng,Igf1,Il10,Il12b,Il1r2,Il6,Acod1,Lag3,Lef1,Il1rl1,Smad7,Mertk,Cd200,Gbp4,Pparg,Prg2,Prnp,Ptger4,Ptprs,Rac1,Rel,Cx3cl1,Tgfb2,Tgfb3,Thbs1,Tnf,Tnfaip3,Tnfrsf9,Tnfrsf4,Tnfsf4,Wnt11,Tlr2,Axl,Ndrg2,Elane,Rabgef1,Tbx21,Pdcd1lg2,Cd274,Twsg1,Rgcc,Rnf128,Errfi1,Gpnmb,Cd276,Ffar4,Havcr2,Lilra5,Nav3,Nlrc3,C5ar2,Tigit
3_Member	GO Biological Processes	GO:0050663	cytokine secretion	-11.458	57/232	Abca1,Aif1,Arg2,Cd14,Cd34,Cd36,Chil1,Ccr5,Ccr7,Cyp2j6,Fbln1,Flt3,Fzd5,Gas6,Gata3,Htr2b,Ifng,Il10,Il1a,Il1b,Il1r2,Il4ra,Il6,Il1rl1,Mmp12,Cd200,Osm,Ptger4,Rasgrp1,Ccl3,Cx3cl1,Tnf,Tnfaip3,Tnfrsf9,Tnfrsf4,Tnfsf4,Tlr2,Tlr5,Cd160,Cadm1,Clec4e,Clec4n,Rabgef1,Scamp5,Trem1,Cd274,Rgcc,Mcoln2,Cd276,Ffar4,Card11,Cd209d,Havcr2,Clec9a,Lilra5,Ffar2,C5ar2
3_Member	GO Biological Processes	GO:0050707	regulation of cytokine secretion	-11.1613	52/204	Aif1,Arg2,Cd14,Cd34,Cd36,Ccr5,Ccr7,Cyp2j6,Fbln1,Flt3,Fzd5,Gas6,Gata3,Htr2b,Ifng,Il10,Il1a,Il1b,Il1r2,Il4ra,Il6,Il1rl1,Mmp12,Cd200,Osm,Ptger4,Rasgrp1,Ccl3,Cx3cl1,Tnf,Tnfaip3,Tnfrsf9,Tnfrsf4,Tnfsf4,Tlr2,Tlr5,Cd160,Cadm1,Clec4e,Clec4n,Rabgef1,Scamp5,Cd274,Rgcc,Cd276,Ffar4,Cd209d,Havcr2,Clec9a,Lilra5,Ffar2,C5ar2
3_Member	GO Biological Processes	GO:0090087	regulation of peptide transport	-9.45941	119/729	Adam9,Aif1,Birc5,Apod,Arg2,Cacnb3,Cd14,Cd22,Cd34,Cd36,Cd38,Cdh1,Ccr5,Ccr7,Plk3,Cyp2j6,Ect2,Rhbdf1,Fbln1,Flt3,Fyn,Fzd5,Gas6,Gata3,Gja1,Hif1a,Hras,Dnaja1,Htr2b,Ifng,Igf1,Cd74,Il10,Il1a,Il1b,Il1r2,Il4ra,Il6,Jak2,Jup,Kcnn4,Lif,Il1rl1,Mdm2,Mmp12,Cd200,Gbp4,Nup62,Osm,Pde3b,Per2,Pfkl,Prkaca,Prkcq,Pparg,Ppp2ca,Prnp,Ptger4,Ptgs2,Rab34,Rasgrp1,S100a8,S100a9,Ccl2,Ccl3,Ccl5,Cx3cl1,Slc16a1,Sox4,Tcf7l2,Tgfb2,T…
3_Member	GO Biological Processes	GO:0002790	peptide secretion	-8.99416	105/628	Abca1,Adam9,Aif1,Birc5,Arg2,Cd14,Cd22,Cd34,Cd36,Cd38,Chil1,Ccr5,Ccr7,Cpe,Cyp2j6,Dgat1,Rhbdf1,Fbln1,Flt3,Fzd5,Gas6,Gata3,Gja1,Hif1a,Htr2b,Ifng,Igf1,Cd74,Il10,Il1a,Il1b,Il1r2,Il1rn,Il4ra,Il6,Jak2,Kcnn4,Lif,Il1rl1,Mmp12,Mmp7,Cd200,Osm,Pde3b,Per2,Pfkl,Prkcq,Plcg1,Pparg,Ptger4,Rab34,Rasgrp1,S100a8,S100a9,Ccl3,Ccl5,Cx3cl1,Slc16a1,Sox4,Tcf7l2,Tgfb2,Tgfb3,Tnf,Tnfaip3,Cd27,Tnfrsf9,Tnfrsf4,Tnfsf4,Nr1h3,Tlr…
3_Member	GO Biological Processes	GO:0002791	regulation of peptide secretion	-8.88593	90/512	Adam9,Aif1,Birc5,Arg2,Cd14,Cd22,Cd34,Cd36,Cd38,Ccr5,Ccr7,Cyp2j6,Rhbdf1,Fbln1,Flt3,Fzd5,Gas6,Gata3,Gja1,Hif1a,Htr2b,Ifng,Igf1,Cd74,Il10,Il1a,Il1b,Il1r2,Il4ra,Il6,Jak2,Kcnn4,Lif,Il1rl1,Mmp12,Cd200,Osm,Pde3b,Per2,Pfkl,Prkcq,Pparg,Ptger4,Rab34,Rasgrp1,S100a8,S100a9,Ccl3,Ccl5,Cx3cl1,Slc16a1,Sox4,Tcf7l2,Tgfb2,Tgfb3,Tnf,Tnfaip3,Tnfrsf9,Tnfrsf4,Tnfsf4,Nr1h3,Tlr2,Tlr5,Cd160,Cadm1,Clec4e,Clec4n,Clcf1,Rabge…
3_Member	GO Biological Processes	GO:0051222	positive regulation of protein transport	-8.42387	77/422	Adam9,Aif1,Cacnb3,Cd14,Cd34,Cd36,Cd38,Cdh1,Ccr5,Ccr7,Plk3,Cyp2j6,Ect2,Flt3,Fyn,Fzd5,Gas6,Gata3,Gja1,Hif1a,Hras,Htr2b,Ifng,Igf1,Il10,Il1a,Il1b,Il4ra,Il6,Jak2,Jup,Kcnn4,Il1rl1,Mdm2,Mmp12,Osm,Prkaca,Prkcq,Prnp,Ptger4,Ptgs2,Rab34,Rasgrp1,Ccl2,Ccl3,Sox4,Tcf7l2,Tgfb2,Tgfb3,Tnf,Tnfrsf4,Tnfsf4,Tlr2,Camk1,Rufy3,Cd160,Cadm1,Clec4e,Clec4n,Gsk3b,Scamp5,Cd274,Rgcc,Trpm4,Uaca,Tcaf1,Hcar2,Cd276,Cd209d,Havcr2,Cl…
3_Member	GO Biological Processes	GO:0051223	regulation of protein transport	-8.26748	110/688	Adam9,Aif1,Birc5,Apod,Arg2,Cacnb3,Cd14,Cd22,Cd34,Cd36,Cd38,Cdh1,Ccr5,Ccr7,Plk3,Cyp2j6,Ect2,Rhbdf1,Fbln1,Flt3,Fyn,Fzd5,Gas6,Gata3,Gja1,Hif1a,Hras,Dnaja1,Htr2b,Ifng,Igf1,Il10,Il1a,Il1b,Il1r2,Il4ra,Il6,Jak2,Jup,Kcnn4,Il1rl1,Mdm2,Mmp12,Cd200,Gbp4,Nup62,Osm,Pde3b,Per2,Pfkl,Prkaca,Prkcq,Ppp2ca,Prnp,Ptger4,Ptgs2,Rab34,Rasgrp1,Ccl2,Ccl3,Ccl5,Cx3cl1,Slc16a1,Sox4,Tcf7l2,Tgfb2,Tgfb3,Tnf,Tnfaip3,Tnfrsf9,Tnfr…
3_Member	GO Biological Processes	GO:0050715	positive regulation of cytokine secretion	-8.06837	37/146	Aif1,Cd14,Cd34,Cd36,Ccr5,Ccr7,Cyp2j6,Flt3,Fzd5,Gata3,Htr2b,Ifng,Il10,Il1a,Il1b,Il4ra,Il1rl1,Mmp12,Osm,Ptger4,Rasgrp1,Ccl3,Tnf,Tlr2,Cd160,Cadm1,Clec4e,Clec4n,Scamp5,Cd274,Rgcc,Cd276,Cd209d,Havcr2,Clec9a,Lilra5,Ffar2
3_Member	GO Biological Processes	GO:0070201	regulation of establishment of protein localization	-8.05059	113/719	Adam9,Aif1,Birc5,Apod,Arg2,Cacnb3,Cd14,Cd22,Cd34,Cd36,Cd38,Cdh1,Ccr5,Ccr7,Plk3,Cyp2j6,Ect2,Rhbdf1,Fbln1,Flt3,Fyn,Fzd5,Gas6,Gata3,Gja1,Hdac6,Hif1a,Hras,Dnaja1,Htr2b,Ifng,Igf1,Il10,Il1a,Il1b,Il1r2,Il4ra,Il6,Jak2,Jup,Kcnn4,Il1rl1,Mdm2,Mmp12,Cd200,Gbp4,Nup62,Osm,Pde3b,Per2,Pfkl,Prkaca,Prkcq,Ppp2ca,Prnp,Ptger4,Ptgs2,Rab34,Rasgrp1,Ccl2,Ccl3,Ccl5,Cx3cl1,Slc16a1,Sox4,Tcf7l2,Tgfb2,Tgfb3,Tnf,Tnfaip3,Tnfrsf…
3_Member	GO Biological Processes	GO:0002793	positive regulation of peptide secretion	-7.90652	62/320	Adam9,Aif1,Cd14,Cd34,Cd36,Cd38,Ccr5,Ccr7,Cyp2j6,Flt3,Fzd5,Gata3,Gja1,Hif1a,Htr2b,Ifng,Igf1,Il10,Il1a,Il1b,Il4ra,Il6,Jak2,Kcnn4,Lif,Il1rl1,Mmp12,Osm,Prkcq,Ptger4,Rab34,Rasgrp1,S100a8,S100a9,Ccl3,Sox4,Tcf7l2,Tgfb2,Tgfb3,Tnf,Tnfrsf4,Tnfsf4,Tlr2,Cd160,Cadm1,Clec4e,Clec4n,Clcf1,Scamp5,Cd274,Rgcc,Trpm4,Hcar2,Cd276,Ildr1,Cd209d,Havcr2,Clec9a,Lilra5,Ffar2,Gpr68,Irs2
3_Member	GO Biological Processes	GO:1904951	positive regulation of establishment of protein localization	-7.90468	78/441	Adam9,Aif1,Cacnb3,Cd14,Cd34,Cd36,Cd38,Cdh1,Ccr5,Ccr7,Plk3,Cyp2j6,Ect2,Flt3,Fyn,Fzd5,Gas6,Gata3,Gja1,Hif1a,Hras,Htr2b,Ifng,Igf1,Il10,Il1a,Il1b,Il4ra,Il6,Jak2,Jup,Kcnn4,Il1rl1,Mdm2,Mmp12,Osm,Prkaca,Prkcq,Prnp,Ptger4,Ptgs2,Rab34,Rasgrp1,Ccl2,Ccl3,Sox4,Tcf7l2,Tgfb2,Tgfb3,Tnf,Tnfrsf4,Tnfsf4,Tlr2,Camk1,Rufy3,Cd160,Cadm1,Clec4e,Clec4n,Gsk3b,Scamp5,Pmaip1,Cd274,Rgcc,Trpm4,Uaca,Tcaf1,Hcar2,Cd276,Cd209d,Ha…
3_Member	GO Biological Processes	GO:0050708	regulation of protein secretion	-7.53869	81/473	Adam9,Aif1,Birc5,Arg2,Cd14,Cd22,Cd34,Cd36,Cd38,Ccr5,Ccr7,Cyp2j6,Rhbdf1,Fbln1,Flt3,Fzd5,Gas6,Gata3,Gja1,Hif1a,Htr2b,Ifng,Igf1,Il10,Il1a,Il1b,Il1r2,Il4ra,Il6,Jak2,Kcnn4,Il1rl1,Mmp12,Cd200,Osm,Pde3b,Per2,Pfkl,Prkcq,Ptger4,Rab34,Rasgrp1,Ccl3,Ccl5,Cx3cl1,Slc16a1,Sox4,Tcf7l2,Tgfb2,Tgfb3,Tnf,Tnfaip3,Tnfrsf9,Tnfrsf4,Tnfsf4,Nr1h3,Tlr2,Tlr5,Cd160,Cadm1,Clec4e,Clec4n,Rabgef1,Scamp5,Cd274,Rgcc,Trpm4,Hcar2,Cd…
3_Member	GO Biological Processes	GO:0050714	positive regulation of protein secretion	-7.49554	57/291	Adam9,Aif1,Cd14,Cd34,Cd36,Cd38,Ccr5,Ccr7,Cyp2j6,Flt3,Fzd5,Gata3,Gja1,Hif1a,Htr2b,Ifng,Igf1,Il10,Il1a,Il1b,Il4ra,Il6,Jak2,Kcnn4,Il1rl1,Mmp12,Osm,Prkcq,Ptger4,Rab34,Rasgrp1,Ccl3,Sox4,Tcf7l2,Tgfb2,Tgfb3,Tnf,Tnfrsf4,Tnfsf4,Tlr2,Cd160,Cadm1,Clec4e,Clec4n,Scamp5,Cd274,Rgcc,Trpm4,Hcar2,Cd276,Cd209d,Havcr2,Clec9a,Lilra5,Ffar2,Gpr68,Irs2
3_Member	GO Biological Processes	GO:0009306	protein secretion	-7.32619	94/583	Abca1,Adam9,Aif1,Birc5,Arg2,Cd14,Cd22,Cd34,Cd36,Cd38,Chil1,Ccr5,Ccr7,Cyp2j6,Dgat1,Rhbdf1,Fbln1,Flt3,Fzd5,Gas6,Gata3,Gja1,Hif1a,Htr2b,Ifng,Igf1,Il10,Il1a,Il1b,Il1r2,Il1rn,Il4ra,Il6,Jak2,Kcnn4,Il1rl1,Mmp12,Cd200,Osm,Pde3b,Per2,Pfkl,Prkcq,Plcg1,Ptger4,Rab34,Rasgrp1,Ccl3,Ccl5,Cx3cl1,Slc16a1,Sox4,Tcf7l2,Tgfb2,Tgfb3,Tnf,Tnfaip3,Cd27,Tnfrsf9,Tnfrsf4,Tnfsf4,Nr1h3,Tlr2,Tlr5,Cd160,Cadm1,Plek,Clec4e,Clec4n,…
3_Member	GO Biological Processes	GO:0050710	negative regulation of cytokine secretion	-6.32706	20/63	Arg2,Cd34,Fbln1,Gas6,Il10,Il1r2,Il6,Cd200,Ptger4,Cx3cl1,Tnf,Tnfaip3,Tnfrsf9,Tnfrsf4,Tnfsf4,Rabgef1,Rgcc,Ffar4,Lilra5,C5ar2
3_Member	GO Biological Processes	GO:1903532	positive regulation of secretion by cell	-6.1614	75/460	Adam9,Aif1,Cd14,Cd34,Cd36,Cd38,Ccr5,Ccr7,Cyp2j6,Dab2,Fgfr1,Flt3,Ncs1,Fzd5,Gab2,Gata3,Gja1,Hif1a,Htr2b,Ifng,Igf1,Il10,Il1a,Il1b,Il4ra,Il6,Jak2,Kcnn4,Lamp1,Lif,Il1rl1,Mmp12,Osm,Prkcq,Plcd1,Ptafr,Ptger4,Rab34,Rasgrp1,Ccl3,Sox4,Sphk1,Spp1,Stxbp1,Sdc1,Sdc4,Tcf7l2,Tgfb2,Tgfb3,Tnf,Tnfrsf4,Tnfsf4,Tlr2,Cd160,Cadm1,Clec4e,Clec4n,Clcf1,Scamp5,Cd274,Rgcc,Trpm4,Stxbp5,Hcar2,Dtnbp1,Cd276,Ildr1,Cd209d,Havcr2,Tm…
3_Member	GO Biological Processes	GO:0051047	positive regulation of secretion	-5.95351	81/515	Adam9,Aif1,Cd14,Cd34,Cd36,Cd38,Ccr5,Ccr7,Cyp2j6,Dab2,Ednrb,Fgfr1,Flt3,Ncs1,Fzd5,Gab2,Gata3,Gja1,Hif1a,Htr2b,Ifng,Igf1,Il10,Il1a,Il1b,Il4ra,Il6,Jak2,Kcnn4,Lamp1,Lif,Il1rl1,Mmp12,Osm,P2ry2,Prkcq,Plcd1,Ptafr,Ptger4,Rab34,Rasgrp1,S100a8,S100a9,Ccl3,Sox4,Sphk1,Spp1,Stxbp1,Sdc1,Sdc4,Tcf7l2,Tgfb2,Tgfb3,Tnf,Tnfrsf11a,Tnfrsf4,Tnfsf4,Tlr2,Cd160,Cadm1,Clec4e,Clec4n,Clcf1,Scamp5,Cd274,Rgcc,Trpm4,Stxbp5,Hcar2…
3_Member	GO Biological Processes	GO:0051051	negative regulation of transport	-5.89555	82/525	Actn2,Akt1,Apod,Arg2,Bcl2,Cacnb3,Cav1,Cd22,Cd34,Cd36,Entpd1,Rhbdf1,Fbln1,Gas6,Gem,Gnaq,Hes1,Hrh2,Htr7,Ier3,Cd74,Il10,Il1b,Il1r2,Il1rn,Il6,Fabp5,Anpep,Lif,Cd200,Gbp4,Myc,Nedd4,Osm,Pde3b,Enpp1,Pea15a,Pfkl,Prkcb,Pparg,Ppp2ca,Ptger4,Ptgs1,Ptgs2,Atxn2,Cx3cl1,Serpine2,Tgfb2,Thbs1,Tnf,Tnfaip3,Tnfrsf9,Tnfrsf4,Tnfsf4,Nr1h3,Pacsin1,Tlr2,Bin1,Usp2,Stk39,Rrad,Rabgef1,Scamp5,Rgcc,Ankrd13a,P2ry12,Cttnbp2nl,Atp…
3_Member	GO Biological Processes	GO:0002792	negative regulation of peptide secretion	-4.21392	30/154	Arg2,Cd22,Cd34,Rhbdf1,Fbln1,Gas6,Cd74,Il10,Il1b,Il1r2,Il6,Cd200,Pde3b,Pfkl,Pparg,Ptger4,Cx3cl1,Tnf,Tnfaip3,Tnfrsf9,Tnfrsf4,Tnfsf4,Nr1h3,Rabgef1,Rgcc,Ffar4,Pim3,Lilra5,Siglecg,C5ar2
3_Member	GO Biological Processes	GO:0050709	negative regulation of protein secretion	-3.9608	28/144	Arg2,Cd22,Cd34,Rhbdf1,Fbln1,Gas6,Il10,Il1b,Il1r2,Il6,Cd200,Pde3b,Pfkl,Ptger4,Cx3cl1,Tnf,Tnfaip3,Tnfrsf9,Tnfrsf4,Tnfsf4,Nr1h3,Rabgef1,Rgcc,Ffar4,Pim3,Lilra5,Siglecg,C5ar2
3_Member	GO Biological Processes	GO:0051048	negative regulation of secretion	-3.60381	41/253	Arg2,Cd22,Cd34,Entpd1,Rhbdf1,Fbln1,Gas6,Hrh2,Htr7,Cd74,Il10,Il1b,Il1r2,Il1rn,Il6,Anpep,Lif,Cd200,Osm,Pde3b,Pfkl,Pparg,Ptger4,Ptgs1,Cx3cl1,Tnf,Tnfaip3,Tnfrsf9,Tnfrsf4,Tnfsf4,Nr1h3,Stk39,Rabgef1,Rgcc,P2ry12,Ffar4,Pim3,Lilra5,Ppp1r9a,Siglecg,C5ar2
3_Member	GO Biological Processes	GO:1903531	negative regulation of secretion by cell	-3.4772	37/224	Arg2,Cd22,Cd34,Entpd1,Rhbdf1,Fbln1,Gas6,Htr7,Il10,Il1b,Il1r2,Il1rn,Il6,Lif,Cd200,Osm,Pde3b,Pfkl,Pparg,Ptger4,Ptgs1,Cx3cl1,Tnf,Tnfaip3,Tnfrsf9,Tnfrsf4,Tnfsf4,Nr1h3,Rabgef1,Rgcc,P2ry12,Ffar4,Pim3,Lilra5,Ppp1r9a,Siglecg,C5ar2
3_Member	GO Biological Processes	GO:1904950	negative regulation of establishment of protein localization	-3.15968	33/200	Apod,Arg2,Cd22,Cd34,Cd36,Rhbdf1,Fbln1,Gas6,Dnaja1,Il10,Il1b,Il1r2,Il6,Cd200,Gbp4,Pde3b,Pfkl,Ppp2ca,Ptger4,Cx3cl1,Tnf,Tnfaip3,Tnfrsf9,Tnfrsf4,Tnfsf4,Nr1h3,Rabgef1,Rgcc,Ffar4,Pim3,Lilra5,Siglecg,C5ar2
3_Member	GO Biological Processes	GO:0051224	negative regulation of protein transport	-3.04136	32/195	Apod,Arg2,Cd22,Cd34,Cd36,Rhbdf1,Fbln1,Gas6,Il10,Il1b,Il1r2,Il6,Cd200,Gbp4,Pde3b,Pfkl,Ppp2ca,Ptger4,Cx3cl1,Tnf,Tnfaip3,Tnfrsf9,Tnfrsf4,Tnfsf4,Nr1h3,Rabgef1,Rgcc,Ffar4,Pim3,Lilra5,Siglecg,C5ar2
4_Summary	GO Biological Processes	GO:0006954	inflammatory response	-22.6553	146/674	Acp5,Adam8,Aif1,Akt1,Apod,Apoe,Slc7a2,C1qa,Ciita,C3ar1,C5ar1,Cd14,Cd28,Cd6,Cebpb,Chil1,Socs3,Ccr1,Ccr5,Ccr7,Csf1,Dnase1l3,Ednra,Ednrb,Epha2,F3,Gata3,B4galt1,Gja1,Hif1a,Ier3,Cxcl10,Igf1,Il10,Il12b,Il18rap,Il1a,Il1b,Il1r2,Il1rn,Il18r1,Il2ra,Il4ra,Il6,Acod1,Jak2,Jun,Kit,Kl,Lat,Loxl3,Il1rl1,Tpsb2,Cxcl9,Cd200,Nfkbia,Orm1,Osm,Prkcq,Serpine1,Pmp22,Pparg,Ptafr,Ptger4,Ptgs1,Ptgs2,Rasgrp1,Rel,Rela,S100a8,S…
4_Member	GO Biological Processes	GO:0006954	inflammatory response	-22.6553	146/674	Acp5,Adam8,Aif1,Akt1,Apod,Apoe,Slc7a2,C1qa,Ciita,C3ar1,C5ar1,Cd14,Cd28,Cd6,Cebpb,Chil1,Socs3,Ccr1,Ccr5,Ccr7,Csf1,Dnase1l3,Ednra,Ednrb,Epha2,F3,Gata3,B4galt1,Gja1,Hif1a,Ier3,Cxcl10,Igf1,Il10,Il12b,Il18rap,Il1a,Il1b,Il1r2,Il1rn,Il18r1,Il2ra,Il4ra,Il6,Acod1,Jak2,Jun,Kit,Kl,Lat,Loxl3,Il1rl1,Tpsb2,Cxcl9,Cd200,Nfkbia,Orm1,Osm,Prkcq,Serpine1,Pmp22,Pparg,Ptafr,Ptger4,Ptgs1,Ptgs2,Rasgrp1,Rel,Rela,S100a8,S…
4_Member	GO Biological Processes	GO:0032101	regulation of response to external stimulus	-20.6334	153/756	Acp5,Adam8,Angpt2,Aif1,Apod,Apoe,Arg1,Arg2,Slc7a2,Prdm1,C1qa,C3ar1,C5ar1,Cacnb3,Capn3,Cav1,Cd28,Cd34,Cd36,Cd6,Cd9,Cdkn1a,Cebpb,Socs3,Cxcr4,Ccr1,Ccr5,Ccr7,Csf1,Dapk2,Dnase1l3,S1pr1,Ednra,Ednrb,F7,Fgf1,Fgfr1,Gas6,Gata3,Gja1,Pdpn,Lpar1,Ier3,Cxcl10,Ifng,Igf1,Cd74,Il10,Il12b,Il12rb1,Il1b,Il1r2,Il2ra,Il6,Acod1,Jak2,Kdr,Ltf,Il1rl1,Mmp12,Cd200,Gbp4,Mt3,Nbl1,Nfkbia,Osm,Pdgfa,Pdgfb,Prkcq,Serpine1,Plau,Pmp2…
4_Member	GO Biological Processes	GO:0050727	regulation of inflammatory response	-13.4775	78/343	Acp5,Adam8,Apod,Apoe,Slc7a2,C1qa,C5ar1,Cd28,Cd6,Cebpb,Socs3,Ccr5,Ccr7,Dnase1l3,Ednra,Ednrb,Gata3,Ier3,Igf1,Il10,Il12b,Il1b,Il1r2,Il2ra,Il6,Acod1,Jak2,Il1rl1,Cd200,Nfkbia,Osm,Serpine1,Pmp22,Pparg,Ptger4,Ptgs2,Rela,S100a8,S100a9,Ccl3,Ccl5,Cx3cl1,Serpinf1,Tgm2,Tnf,Tnfaip3,Tnfaip6,Tnfrsf11a,Tnfsf4,Nr1h3,Ets1,Mgll,Nt5e,Tlr2,Pbk,Mfhas1,Stk39,Ccl24,Clcf1,Rabgef1,Fndc4,Uaca,Nfkbiz,Trem2,Pik3ap1,Cd276,Ffa…
4_Member	GO Biological Processes	GO:0032103	positive regulation of response to external stimulus	-9.59889	64/305	Adam8,Aif1,Arg1,C1qa,C3ar1,C5ar1,Cd28,Cd6,Cebpb,Ccr1,Ccr5,Ccr7,Csf1,Dapk2,S1pr1,Ednra,F7,Fgfr1,Gas6,Lpar1,Cxcl10,Cd74,Il1b,Il6,Acod1,Jak2,Kdr,Il1rl1,Nfkbia,Osm,Pdgfb,Serpine1,Lgmn,Ptger4,Ptgs2,Rac1,Rab34,S100a8,S100a9,Ccl2,Ccl3,Ccl4,Ccl5,Cx3cl1,Tgm2,Thbs1,Tnf,Tnfrsf11a,Tnfsf4,Vegfb,Ets1,Tlr2,Stk39,Ccl24,Cxcl14,P2ry12,Zc3hav1,Nfkbiz,Ndel1,Trem2,Tlr3,Havcr2,Lilra5,Ffar2
4_Member	GO Biological Processes	GO:0050729	positive regulation of inflammatory response	-6.70697	33/137	Adam8,C1qa,Cd28,Cd6,Cebpb,Ccr5,Ccr7,Ednra,Il1b,Il6,Jak2,Il1rl1,Nfkbia,Osm,Serpine1,Ptger4,Ptgs2,S100a8,S100a9,Ccl3,Ccl5,Tgm2,Tnf,Tnfrsf11a,Tnfsf4,Ets1,Tlr2,Ccl24,Nfkbiz,Trem2,Tlr3,Lilra5,Ffar2
5_Summary	GO Biological Processes	GO:0030335	positive regulation of cell migration	-22.1285	124/532	Adam8,Adam9,Adamts1,Aif1,Akt1,Arf6,Rhoc,Arhgap5,Bcl2,C3ar1,C5ar1,Cav1,Cxcr4,Ccr1,Ccr7,Ackr3,Col18a1,Bcar1,Csf1,Dab2,Dapk2,Dapk3,S1pr1,Ednra,Egr1,F3,F7,Ptk2,Fbln1,Fer,Fgf1,Fgfr1,Gab1,Gab2,Gas6,Gata3,Pdpn,Lpar1,Hspa5,Hdac6,Hbegf,Hif1a,Hras,Cxcl10,Ifng,Igf1,Ccn1,Cd74,Il1a,Il1b,Itga6,Jak2,Jun,Kdr,Kit,Lef1,Mdm2,Kitl,Mmp14,Mmp2,Myc,Nr4a3,P2ry2,Pdgfa,Pdgfb,Enpp2,Pecam1,Serpine1,Plau,Plcg1,Lgmn,Ptafr,Ptg…
5_Member	GO Biological Processes	GO:0030335	positive regulation of cell migration	-22.1285	124/532	Adam8,Adam9,Adamts1,Aif1,Akt1,Arf6,Rhoc,Arhgap5,Bcl2,C3ar1,C5ar1,Cav1,Cxcr4,Ccr1,Ccr7,Ackr3,Col18a1,Bcar1,Csf1,Dab2,Dapk2,Dapk3,S1pr1,Ednra,Egr1,F3,F7,Ptk2,Fbln1,Fer,Fgf1,Fgfr1,Gab1,Gab2,Gas6,Gata3,Pdpn,Lpar1,Hspa5,Hdac6,Hbegf,Hif1a,Hras,Cxcl10,Ifng,Igf1,Ccn1,Cd74,Il1a,Il1b,Itga6,Jak2,Jun,Kdr,Kit,Lef1,Mdm2,Kitl,Mmp14,Mmp2,Myc,Nr4a3,P2ry2,Pdgfa,Pdgfb,Enpp2,Pecam1,Serpine1,Plau,Plcg1,Lgmn,Ptafr,Ptg…
5_Member	GO Biological Processes	GO:2000147	positive regulation of cell motility	-21.0047	125/554	Adam8,Adam9,Adamts1,Aif1,Akt1,Arf6,Rhoc,Arhgap5,Bcl2,C3ar1,C5ar1,Cav1,Cxcr4,Ccr1,Ccr7,Ackr3,Col18a1,Bcar1,Csf1,Dab2,Dapk2,Dapk3,S1pr1,Ednra,Egr1,F3,F7,Ptk2,Fbln1,Fer,Fgf1,Fgfr1,Gab1,Gab2,Gas6,Gata3,Pdpn,Lpar1,Hspa5,Hdac6,Hbegf,Hif1a,Hras,Cxcl10,Ifng,Igf1,Ccn1,Cd74,Il1a,Il1b,Itga6,Jak2,Jun,Kdr,Kit,Lef1,Epcam,Mdm2,Kitl,Mmp14,Mmp2,Myc,Nr4a3,P2ry2,Pdgfa,Pdgfb,Enpp2,Pecam1,Serpine1,Plau,Plcg1,Lgmn,Pta…
5_Member	GO Biological Processes	GO:0051272	positive regulation of cellular component movement	-20.7639	127/571	Adam8,Adam9,Adamts1,Aif1,Akt1,Arf6,Rhoc,Arhgap5,Bcl2,C3ar1,C5ar1,Cav1,Cxcr4,Ccr1,Ccr7,Ackr3,Col18a1,Bcar1,Csf1,Dab2,Dapk2,Dapk3,S1pr1,Ednra,Egr1,F3,F7,Ptk2,Fbln1,Fer,Fgf1,Fgfr1,Gab1,Gab2,Gas6,Gata3,Pdpn,Lpar1,Hspa5,Hdac6,Hbegf,Hif1a,Hras,Cxcl10,Ifng,Igf1,Ccn1,Cd74,Il1a,Il1b,Itga6,Jak2,Jun,Kdr,Kit,Stmn1,Lef1,Epcam,Mdm2,Kitl,Mmp14,Mmp2,Myc,Nr4a3,P2ry2,Pdgfa,Pdgfb,Enpp2,Pecam1,Serpine1,Plau,Plcg1,Lg…
5_Member	GO Biological Processes	GO:0050900	leukocyte migration	-19.9384	89/335	Adam8,Aif1,Akt1,Apod,C3ar1,C5ar1,Cd34,Ch25h,Ccr1,Ccr7,Csf1,Cxadr,Dapk2,S1pr1,Ednra,Ednrb,F7,Fer,Gas6,Gata3,Gcsam,Gcnt1,B4galt1,Hrh1,Cxcl10,Ifng,Cd74,Il1a,Il1b,Il1rn,Itga6,Kit,Kitl,Cxcl9,Mmp14,Cd200,Nbl1,Pde4b,Pdgfb,Pecam1,Serpine1,Lgmn,Ptafr,Ptger4,Dusp1,Rac1,S100a8,S100a9,Ccl12,Ccl17,Ccl2,Ccl22,Ccl3,Ccl4,Ccl5,Ccl7,Ccl8,Cxcl2,Cx3cl1,Slc12a2,Spp1,Thbs1,Tnf,Tnfrsf18,Tnfsf4,Vcam1,Vegfb,Tlr2,Klrk1,El…
5_Member	GO Biological Processes	GO:0040017	positive regulation of locomotion	-19.7445	127/586	Adam8,Adam9,Adamts1,Aif1,Akt1,Arf6,Rhoc,Arhgap5,Bcl2,C3ar1,C5ar1,Cav1,Cxcr4,Ccr1,Ccr7,Ackr3,Col18a1,Bcar1,Csf1,Dab2,Dapk2,Dapk3,S1pr1,Ednra,Egr1,F3,F7,Ptk2,Fbln1,Fer,Fgf1,Fgfr1,Gab1,Gab2,Gas6,Gata3,Pdpn,Lpar1,Hspa5,Hdac6,Hbegf,Hif1a,Hras,Cxcl10,Ifng,Igf1,Ccn1,Cd74,Il1a,Il1b,Itga6,Jak2,Jun,Kdr,Kit,Lef1,Epcam,Mdm2,Kitl,Mmp14,Mmp2,Myc,Nr4a3,P2ry2,Pcx,Pdgfa,Pdgfb,Enpp2,Pecam1,Serpine1,Plau,Plcg1,Lgmn…
5_Member	GO Biological Processes	GO:0060326	cell chemotaxis	-18.7557	81/299	Adam8,Aif1,C3ar1,C5ar1,Ch25h,Cxcr4,Ccr1,Ccr5,Ccr7,Ackr3,Bcar1,Csf1,Cxadr,Dapk2,S1pr1,Ednra,Ednrb,Epha2,F7,Fgf1,Fgfr1,Gab1,Gas6,Lpar1,Hbegf,Nr4a1,Hrh1,Cxcl10,Ifng,Cd74,Il1b,Il1rn,Kdr,Kit,Lef1,Cxcl9,Nbl1,Pde4b,Pdgfb,Enpp2,Prkcq,Serpine1,Lgmn,Dusp1,Rac1,S100a8,S100a9,Ccl12,Ccl17,Ccl2,Ccl22,Ccl3,Ccl4,Ccl5,Ccl7,Ccl8,Cxcl2,Cx3cl1,Slc12a2,Spp1,Thbs1,Vcam1,Vegfb,Klrk1,Stk39,Ccrl2,Ccl24,Vav3,Cxcl14,Parva,…
5_Member	GO Biological Processes	GO:0006935	chemotaxis	-16.3321	119/584	Adam8,Angpt2,Aif1,Apbb2,C3ar1,C5ar1,Runx3,Ch25h,Cxcr4,Ccr1,Ccr5,Ccr7,Ackr3,Bcar1,Csf1,Cxadr,Dapk2,S1pr1,Ednra,Ednrb,Egr2,Epha2,Ephb3,F7,Fer,Fgf1,Fgfr1,Gab1,Gas1,Gas6,Gata3,Lpar1,Hbegf,Nr4a1,Hrh1,Cxcl10,Ifng,Ccn1,Cd74,Il1b,Il1rn,Kdr,Kit,Lamb2,Lef1,Matn2,Cxcl9,Nbl1,Nr4a3,Nrp2,Pde4b,Pdgfa,Pdgfb,Enpp2,Prkcq,Serpine1,Plxna1,Lgmn,Ptafr,Dusp1,Ptprm,Rac1,Ryk,S100a8,S100a9,Scn1b,Ccl12,Ccl17,Ccl2,Ccl22,Ccl…
5_Member	GO Biological Processes	GO:0042330	taxis	-16.1555	119/587	Adam8,Angpt2,Aif1,Apbb2,C3ar1,C5ar1,Runx3,Ch25h,Cxcr4,Ccr1,Ccr5,Ccr7,Ackr3,Bcar1,Csf1,Cxadr,Dapk2,S1pr1,Ednra,Ednrb,Egr2,Epha2,Ephb3,F7,Fer,Fgf1,Fgfr1,Gab1,Gas1,Gas6,Gata3,Lpar1,Hbegf,Nr4a1,Hrh1,Cxcl10,Ifng,Ccn1,Cd74,Il1b,Il1rn,Kdr,Kit,Lamb2,Lef1,Matn2,Cxcl9,Nbl1,Nr4a3,Nrp2,Pde4b,Pdgfa,Pdgfb,Enpp2,Prkcq,Serpine1,Plxna1,Lgmn,Ptafr,Dusp1,Ptprm,Rac1,Ryk,S100a8,S100a9,Scn1b,Ccl12,Ccl17,Ccl2,Ccl22,Ccl…
5_Member	GO Biological Processes	GO:0030595	leukocyte chemotaxis	-15.7251	61/211	Adam8,Aif1,C3ar1,C5ar1,Ch25h,Ccr1,Ccr7,Csf1,Cxadr,Dapk2,S1pr1,Ednra,Ednrb,F7,Gas6,Hrh1,Cxcl10,Ifng,Cd74,Il1b,Il1rn,Kit,Cxcl9,Nbl1,Pde4b,Pdgfb,Serpine1,Lgmn,Dusp1,Rac1,S100a8,S100a9,Ccl12,Ccl17,Ccl2,Ccl22,Ccl3,Ccl4,Ccl5,Ccl7,Ccl8,Cxcl2,Cx3cl1,Slc12a2,Spp1,Thbs1,Vegfb,Klrk1,Stk39,Ccl24,Vav3,Cxcl14,Trem1,Cxcl16,Trpm4,Jam3,Itga9,Ffar2,Pde4d,C5ar2,Cxcl3
5_Member	GO Biological Processes	GO:0097529	myeloid leukocyte migration	-15.3482	59/203	Adam8,Aif1,C3ar1,C5ar1,Ccr1,Ccr7,Csf1,Cxadr,Dapk2,Ednra,Ednrb,Hrh1,Cxcl10,Ifng,Cd74,Il1a,Il1b,Il1rn,Kit,Cxcl9,Mmp14,Cd200,Nbl1,Pde4b,Pdgfb,Pecam1,Serpine1,Lgmn,Ptger4,Dusp1,Rac1,S100a8,S100a9,Ccl12,Ccl17,Ccl2,Ccl22,Ccl3,Ccl4,Ccl5,Ccl7,Ccl8,Cxcl2,Cx3cl1,Spp1,Thbs1,Vegfb,Ccl24,Vav3,Trem1,Mcoln2,P2ry12,Trem2,Jam3,Itga9,Pawr,Pde4d,C5ar2,Cxcl3
5_Member	GO Biological Processes	GO:1990266	neutrophil migration	-14.5073	42/118	Adam8,C3ar1,C5ar1,Ccr7,Cxadr,Dapk2,Ednra,Cxcl10,Ifng,Cd74,Il1a,Il1b,Il1rn,Cxcl9,Pde4b,Pecam1,Ptger4,Rac1,S100a8,S100a9,Ccl12,Ccl17,Ccl2,Ccl22,Ccl3,Ccl4,Ccl5,Ccl7,Ccl8,Cxcl2,Cx3cl1,Spp1,Ccl24,Vav3,Trem1,Mcoln2,Jam3,Itga9,Pawr,Pde4d,C5ar2,Cxcl3
5_Member	GO Biological Processes	GO:0097530	granulocyte migration	-12.9943	45/145	Adam8,C3ar1,C5ar1,Ccr7,Csf1,Cxadr,Dapk2,Ednra,Hrh1,Cxcl10,Ifng,Cd74,Il1a,Il1b,Il1rn,Cxcl9,Pde4b,Pecam1,Ptger4,Rac1,S100a8,S100a9,Ccl12,Ccl17,Ccl2,Ccl22,Ccl3,Ccl4,Ccl5,Ccl7,Ccl8,Cxcl2,Cx3cl1,Spp1,Thbs1,Ccl24,Vav3,Trem1,Mcoln2,Jam3,Itga9,Pawr,Pde4d,C5ar2,Cxcl3
5_Member	GO Biological Processes	GO:0030593	neutrophil chemotaxis	-12.7067	36/100	C3ar1,C5ar1,Ccr7,Cxadr,Dapk2,Ednra,Cxcl10,Ifng,Cd74,Il1b,Il1rn,Cxcl9,Pde4b,Rac1,S100a8,S100a9,Ccl12,Ccl17,Ccl2,Ccl22,Ccl3,Ccl4,Ccl5,Ccl7,Ccl8,Cxcl2,Cx3cl1,Spp1,Ccl24,Vav3,Trem1,Jam3,Itga9,Pde4d,C5ar2,Cxcl3
5_Member	GO Biological Processes	GO:0071621	granulocyte chemotaxis	-11.6821	39/123	C3ar1,C5ar1,Ccr7,Csf1,Cxadr,Dapk2,Ednra,Hrh1,Cxcl10,Ifng,Cd74,Il1b,Il1rn,Cxcl9,Pde4b,Rac1,S100a8,S100a9,Ccl12,Ccl17,Ccl2,Ccl22,Ccl3,Ccl4,Ccl5,Ccl7,Ccl8,Cxcl2,Cx3cl1,Spp1,Thbs1,Ccl24,Vav3,Trem1,Jam3,Itga9,Pde4d,C5ar2,Cxcl3
5_Member	GO Biological Processes	GO:0002685	regulation of leukocyte migration	-10.7721	50/196	Adam8,Aif1,Akt1,Apod,C3ar1,C5ar1,Ccr1,Ccr7,Csf1,Dapk2,Ednra,F7,Gas6,Gcsam,Cxcl10,Cd74,Il1a,Il1b,Kitl,Mmp14,Cd200,Nbl1,Pecam1,Serpine1,Lgmn,Ptafr,Ptger4,Dusp1,Rac1,Ccl12,Ccl2,Ccl4,Ccl5,Cx3cl1,Thbs1,Tnfrsf18,Tnfsf4,Vegfb,Tlr2,Klrk1,Elane,Stk39,Ccl24,Rabgef1,Cxcl14,P2ry12,Trem2,Jam3,Pawr,C5ar2
5_Member	GO Biological Processes	GO:0002687	positive regulation of leukocyte migration	-10.2681	40/141	Adam8,Aif1,C3ar1,C5ar1,Ccr1,Ccr7,Csf1,Dapk2,Ednra,F7,Gas6,Cxcl10,Cd74,Il1a,Il1b,Kitl,Mmp14,Pecam1,Serpine1,Lgmn,Ptafr,Ptger4,Rac1,Ccl12,Ccl2,Ccl4,Ccl5,Cx3cl1,Thbs1,Tnfrsf18,Tnfsf4,Vegfb,Tlr2,Elane,Stk39,Ccl24,Cxcl14,P2ry12,Trem2,Pawr
5_Member	GO Biological Processes	GO:0002688	regulation of leukocyte chemotaxis	-7.34664	30/111	Aif1,C3ar1,C5ar1,Ccr1,Ccr7,Csf1,Dapk2,Ednra,F7,Gas6,Cxcl10,Cd74,Il1b,Nbl1,Serpine1,Lgmn,Dusp1,Rac1,Ccl12,Ccl2,Ccl4,Ccl5,Cx3cl1,Thbs1,Vegfb,Klrk1,Stk39,Cxcl14,Jam3,C5ar2
5_Member	GO Biological Processes	GO:0050920	regulation of chemotaxis	-6.66982	44/212	Angpt2,Aif1,C3ar1,C5ar1,Cxcr4,Ccr1,Ccr7,Csf1,Dapk2,S1pr1,Ednra,F7,Fgf1,Fgfr1,Gas6,Lpar1,Cxcl10,Cd74,Il1b,Kdr,Nbl1,Pdgfb,Serpine1,Lgmn,Dusp1,Rac1,Ryk,Ccl12,Ccl2,Ccl4,Ccl5,Cx3cl1,Sema4c,Thbs1,Vegfb,Klrk1,Stk39,Cxcl14,P2ry12,Dusp3,Trem2,Jam3,Sema6d,C5ar2
5_Member	GO Biological Processes	GO:0002690	positive regulation of leukocyte chemotaxis	-6.3913	24/85	Aif1,C3ar1,C5ar1,Ccr1,Ccr7,Csf1,Dapk2,Ednra,F7,Gas6,Cxcl10,Cd74,Il1b,Serpine1,Lgmn,Rac1,Ccl2,Ccl4,Ccl5,Cx3cl1,Thbs1,Vegfb,Stk39,Cxcl14
5_Member	GO Biological Processes	GO:0050921	positive regulation of chemotaxis	-5.71516	31/137	Aif1,C3ar1,C5ar1,Ccr1,Ccr7,Csf1,Dapk2,S1pr1,Ednra,F7,Fgfr1,Gas6,Lpar1,Cxcl10,Cd74,Il1b,Kdr,Pdgfb,Serpine1,Lgmn,Rac1,Ccl2,Ccl4,Ccl5,Cx3cl1,Thbs1,Vegfb,Stk39,Cxcl14,P2ry12,Trem2
6_Summary	GO Biological Processes	GO:0000278	mitotic cell cycle	-21.1887	159/790	Adamts1,Aif1,Akt1,Apex1,Birc5,Rhoc,Bcl2,Zfp36l1,Btg1,Btg2,Btg3,Bub1,Bub1b,Ccna2,Ccnb2,Ccnd1,Ccnd2,Ccne1,Ccnf,Cd28,Cdc25a,Cdc25c,Cdk1,Cdc45,Cdc7,Cdkn1a,Cdkn2b,Cenpa,Chek1,Cit,Plk3,Dapk3,Ect2,Eya1,Ezh2,Fer,Fgfr1,Smc2,Foxm1,Gas1,Gem,Pdpn,Hes1,Hras,Prmt2,Ier3,Igf1,Il1a,Il1b,Inhba,Kif11,Kif4,Stmn1,Lig1,Lmnb1,Mdm2,Mki67,Myb,Mybl2,Myc,Nek2,Nup62,Pdgfb,Cdk14,Abcb1a,Pim2,Prkcq,Plk1,Pole,Lgmn,Kif20a,Rad51,…
6_Member	GO Biological Processes	GO:0000278	mitotic cell cycle	-21.1887	159/790	Adamts1,Aif1,Akt1,Apex1,Birc5,Rhoc,Bcl2,Zfp36l1,Btg1,Btg2,Btg3,Bub1,Bub1b,Ccna2,Ccnb2,Ccnd1,Ccnd2,Ccne1,Ccnf,Cd28,Cdc25a,Cdc25c,Cdk1,Cdc45,Cdc7,Cdkn1a,Cdkn2b,Cenpa,Chek1,Cit,Plk3,Dapk3,Ect2,Eya1,Ezh2,Fer,Fgfr1,Smc2,Foxm1,Gas1,Gem,Pdpn,Hes1,Hras,Prmt2,Ier3,Igf1,Il1a,Il1b,Inhba,Kif11,Kif4,Stmn1,Lig1,Lmnb1,Mdm2,Mki67,Myb,Mybl2,Myc,Nek2,Nup62,Pdgfb,Cdk14,Abcb1a,Pim2,Prkcq,Plk1,Pole,Lgmn,Kif20a,Rad51,…
6_Member	GO Biological Processes	GO:1903047	mitotic cell cycle process	-19.4865	134/639	Adamts1,Aif1,Akt1,Apex1,Birc5,Rhoc,Bcl2,Zfp36l1,Bub1,Bub1b,Ccna2,Ccnb2,Ccnd1,Ccnd2,Ccne1,Ccnf,Cd28,Cdc25a,Cdc25c,Cdk1,Cdc45,Cdc7,Cdkn1a,Cdkn2b,Cenpa,Chek1,Cit,Plk3,Ect2,Eya1,Ezh2,Fgfr1,Smc2,Foxm1,Pdpn,Hras,Prmt2,Ier3,Igf1,Il1a,Il1b,Inhba,Kif11,Kif4,Stmn1,Lig1,Lmnb1,Mdm2,Mki67,Myb,Mybl2,Nek2,Nup62,Pdgfb,Cdk14,Abcb1a,Pim2,Prkcq,Plk1,Pole,Kif20a,Rad51,Ccl12,Stil,Plk2,Sox4,Sphk1,Aurka,Tacc3,Tgfa,Tnf,…
6_Member	GO Biological Processes	GO:0007346	regulation of mitotic cell cycle	-11.3457	96/506	Adamts1,Aif1,Akt1,Apex1,Birc5,Bcl2,Zfp36l1,Btg1,Btg2,Btg3,Bub1,Bub1b,Ccna2,Ccnb2,Ccnd1,Ccnd2,Ccne1,Ccnf,Cd28,Cdc25a,Cdc25c,Cdk1,Cdc45,Cdc7,Cdkn1a,Cdkn2b,Chek1,Cit,Plk3,Dapk3,Ezh2,Fgfr1,Gas1,Pdpn,Hes1,Hras,Prmt2,Ier3,Igf1,Il1a,Il1b,Kif11,Lmnb1,Mdm2,Mki67,Myc,Nek2,Nup62,Pdgfb,Prkcq,Plk1,Lgmn,Ccl12,Plk2,Sox4,Sphk1,Tacc3,Tgfa,Timp2,Tnf,Top2a,Ttk,Wee1,Ywhah,Zw10,Asns,Dbf4,E2f7,Usp2,Cks1b,Mad2l1,Pdxp,B…
6_Member	GO Biological Processes	GO:0010564	regulation of cell cycle process	-11.2133	107/592	Adamts1,Aif1,Akt1,Apex1,Birc5,Bcl2,Zfp36l1,Bub1,Bub1b,Ccna2,Ccnb2,Ccnd1,Ccnd2,Ccne1,Ccnf,Cd28,Cdc25a,Cdc25c,Cdk1,Cdc45,Cdc7,Cdkn1a,Cdkn2b,Chek1,Cit,Plk3,Ect2,Ezh2,Fgfr1,Ccn2,Foxm1,Gas1,Pdpn,Prmt2,Ier3,Igf1,Il1a,Il1b,Kif11,Lef1,Lif,Lmnb1,Mdm2,Mki67,Msx1,Nek2,Nup62,Osm,Pdgfb,Prkaca,Prkcq,Plk1,Med1,Kif20a,Rock2,Rps6ka2,Ccl12,Stil,Plk2,Sox4,Sox9,Sphk1,Aurka,Tacc3,Tgfa,Tnf,Ttk,Ywhah,Zw10,Dbf4,Bin1,E2f…
6_Member	GO Biological Processes	GO:0045787	positive regulation of cell cycle	-10.128	73/360	Adamts1,Aif1,Akt1,Apex1,Birc5,Ccna2,Ccnb2,Ccnd1,Ccnd2,Ccne1,Ccnf,Cd28,Cdc25a,Cdc25c,Cdk1,Cdc45,Cdc7,Cdkn1a,Chek1,Cit,Ect2,Ezh2,Fgfr1,Ccn2,Fosl1,Hes1,Igf1,Il10,Il1a,Il1b,Lef1,Lmnb1,Mdm2,Cited2,Msx1,Myc,Nr4a3,Nup62,Pdgfb,Pim1,Prkaca,Med1,Lgmn,Rock2,Stil,Sox4,Sphk1,Tgfa,Tgfb2,Tnf,Asns,Dbf4,E2f7,Usp2,Spag5,Mad2l1,Brd4,Piwil2,Mlxipl,Rgcc,Ndc80,Fbxo5,Cdca5,Sgo2a,Ttl,Dusp3,Dtl,Rcc2,Cenpe,Gdpd5,Kif20b,Cc…
6_Member	GO Biological Processes	GO:0045931	positive regulation of mitotic cell cycle	-9.41047	43/168	Adamts1,Aif1,Akt1,Apex1,Birc5,Ccnd1,Ccnd2,Ccne1,Cd28,Cdc25a,Cdc25c,Cdk1,Cdc45,Cdc7,Fgfr1,Hes1,Igf1,Il1a,Il1b,Lmnb1,Mdm2,Nup62,Pdgfb,Lgmn,Sphk1,Tgfa,Tnf,Asns,Dbf4,Usp2,Mad2l1,Brd4,Rgcc,Ndc80,Fbxo5,Cdca5,Ttl,Dusp3,Dtl,Rcc2,Cenpe,Kif20b,Ccnb1
6_Member	GO Biological Processes	GO:0044772	mitotic cell cycle phase transition	-9.11235	69/349	Adamts1,Aif1,Akt1,Apex1,Birc5,Bcl2,Zfp36l1,Bub1,Bub1b,Ccna2,Ccnd1,Ccnd2,Ccne1,Cdc25a,Cdc25c,Cdk1,Cdc45,Cdc7,Cdkn1a,Cdkn2b,Chek1,Cit,Plk3,Ezh2,Foxm1,Pdpn,Prmt2,Ier3,Inhba,Lmnb1,Mdm2,Myb,Cdk14,Abcb1a,Pim2,Prkcq,Plk1,Pole,Ccl12,Plk2,Sox4,Tacc3,Ttk,Zw10,Dbf4,E2f7,Cks1b,Mad2l1,Brd4,Dact1,Nek6,Donson,Cables1,Rgcc,Ndc80,Fbxo5,Ctdp1,Cdca5,Trip13,Dtl,Ticrr,Gpnmb,Cenpf,Rcc2,Lzts1,Cenpe,Ccnb1,Usp37,Iqgap3
6_Member	GO Biological Processes	GO:0044770	cell cycle phase transition	-9.04234	74/387	Adamts1,Aif1,Akt1,Apex1,Birc5,Bcl2,Zfp36l1,Bub1,Bub1b,Ccna2,Ccnd1,Ccnd2,Ccne1,Cdc25a,Cdc25c,Cdk1,Cdc45,Cdc7,Cdkn1a,Cdkn2b,Chek1,Cit,Plk3,Ezh2,Foxm1,Gas1,Pdpn,Prmt2,Ier3,Inhba,Lmnb1,Mdm2,Myb,Cdk14,Abcb1a,Pim2,Prkcq,Plk1,Pole,Upf1,Ccl12,Plk2,Sox4,Tacc3,Ttk,Zw10,Dbf4,E2f7,Cks1b,Akap8l,Paxip1,Mad2l1,Brd4,Dact1,Nek6,Donson,Cables1,Rgcc,Ndc80,Fbxo5,Ctdp1,Cdca5,Trip13,Susd2,Dtl,Ticrr,Gpnmb,Cenpf,Rcc2,Lz…
6_Member	GO Biological Processes	GO:0090068	positive regulation of cell cycle process	-8.22714	53/250	Adamts1,Aif1,Akt1,Apex1,Birc5,Ccnd1,Ccnd2,Ccne1,Cd28,Cdc25a,Cdc25c,Cdk1,Cdc45,Cdc7,Cdkn1a,Cit,Ect2,Ezh2,Fgfr1,Ccn2,Igf1,Il1a,Il1b,Lef1,Lmnb1,Mdm2,Msx1,Nup62,Pdgfb,Prkaca,Med1,Rock2,Sox4,Sphk1,Tgfa,Tnf,Dbf4,E2f7,Spag5,Mad2l1,Brd4,Piwil2,Rgcc,Ndc80,Fbxo5,Cdca5,Sgo2a,Dtl,Rcc2,Cenpe,Kif20b,Ccnb1,Ddx11
6_Member	GO Biological Processes	GO:1901990	regulation of mitotic cell cycle phase transition	-7.20222	52/260	Adamts1,Aif1,Akt1,Apex1,Birc5,Bcl2,Zfp36l1,Bub1,Bub1b,Ccnd1,Ccnd2,Ccne1,Cdc25a,Cdc25c,Cdk1,Cdc45,Cdc7,Cdkn1a,Cdkn2b,Chek1,Plk3,Ezh2,Pdpn,Prmt2,Ier3,Lmnb1,Mdm2,Prkcq,Plk1,Ccl12,Sox4,Ttk,Zw10,Dbf4,E2f7,Mad2l1,Brd4,Dact1,Nek6,Donson,Rgcc,Ndc80,Fbxo5,Cdca5,Trip13,Dtl,Ticrr,Gpnmb,Cenpf,Rcc2,Cenpe,Ccnb1
6_Member	GO Biological Processes	GO:1901987	regulation of cell cycle phase transition	-6.71825	55/291	Adamts1,Aif1,Akt1,Apex1,Birc5,Bcl2,Zfp36l1,Bub1,Bub1b,Ccnd1,Ccnd2,Ccne1,Cdc25a,Cdc25c,Cdk1,Cdc45,Cdc7,Cdkn1a,Cdkn2b,Chek1,Plk3,Ezh2,Gas1,Pdpn,Prmt2,Ier3,Lmnb1,Mdm2,Prkcq,Plk1,Ccl12,Sox4,Ttk,Zw10,Dbf4,E2f7,Paxip1,Mad2l1,Brd4,Dact1,Nek6,Donson,Rgcc,Ndc80,Fbxo5,Cdca5,Trip13,Susd2,Dtl,Ticrr,Gpnmb,Cenpf,Rcc2,Cenpe,Ccnb1
6_Member	GO Biological Processes	GO:1901992	positive regulation of mitotic cell cycle phase transition	-6.49611	24/84	Adamts1,Aif1,Akt1,Apex1,Birc5,Ccnd1,Ccnd2,Ccne1,Cdc25a,Cdc25c,Cdk1,Cdc45,Cdc7,Lmnb1,Mdm2,Dbf4,Brd4,Rgcc,Fbxo5,Cdca5,Dtl,Rcc2,Cenpe,Ccnb1
6_Member	GO Biological Processes	GO:1901989	positive regulation of cell cycle phase transition	-5.81537	25/97	Adamts1,Aif1,Akt1,Apex1,Birc5,Ccnd1,Ccnd2,Ccne1,Cdc25a,Cdc25c,Cdk1,Cdc45,Cdc7,Ezh2,Lmnb1,Mdm2,Dbf4,Brd4,Rgcc,Fbxo5,Cdca5,Dtl,Rcc2,Cenpe,Ccnb1
6_Member	GO Biological Processes	GO:0044843	cell cycle G1/S phase transition	-4.91602	36/185	Adamts1,Aif1,Akt1,Apex1,Bcl2,Ccna2,Ccnd1,Ccnd2,Ccne1,Cdc25a,Cdc45,Cdkn1a,Cdkn2b,Plk3,Ezh2,Gas1,Pdpn,Prmt2,Inhba,Mdm2,Myb,Pim2,Pole,Ccl12,Plk2,Sox4,Dbf4,E2f7,Brd4,Dact1,Cables1,Rgcc,Susd2,Gpnmb,Usp37,Iqgap3
6_Member	GO Biological Processes	GO:0000082	G1/S transition of mitotic cell cycle	-4.48468	33/171	Adamts1,Aif1,Akt1,Apex1,Bcl2,Ccnd1,Ccnd2,Ccne1,Cdc25a,Cdc45,Cdkn1a,Cdkn2b,Plk3,Ezh2,Pdpn,Prmt2,Inhba,Mdm2,Myb,Pim2,Pole,Ccl12,Plk2,Sox4,Dbf4,E2f7,Brd4,Dact1,Cables1,Rgcc,Gpnmb,Usp37,Iqgap3
6_Member	GO Biological Processes	GO:1902806	regulation of cell cycle G1/S phase transition	-3.6344	25/128	Adamts1,Aif1,Akt1,Apex1,Bcl2,Ccnd1,Ccnd2,Ccne1,Cdc45,Cdkn1a,Cdkn2b,Plk3,Ezh2,Gas1,Pdpn,Prmt2,Mdm2,Ccl12,Sox4,Dbf4,E2f7,Dact1,Rgcc,Susd2,Gpnmb
6_Member	GO Biological Processes	GO:2000045	regulation of G1/S transition of mitotic cell cycle	-3.60598	23/114	Adamts1,Aif1,Akt1,Apex1,Bcl2,Ccnd1,Ccnd2,Ccne1,Cdc45,Cdkn1a,Cdkn2b,Plk3,Ezh2,Pdpn,Prmt2,Mdm2,Ccl12,Sox4,Dbf4,E2f7,Dact1,Rgcc,Gpnmb
6_Member	GO Biological Processes	GO:1902807	negative regulation of cell cycle G1/S phase transition	-3.25204	15/64	Bcl2,Ccnd1,Cdkn1a,Cdkn2b,Plk3,Ezh2,Gas1,Prmt2,Mdm2,Ccl12,Sox4,E2f7,Dact1,Susd2,Gpnmb
6_Member	GO Biological Processes	GO:1900087	positive regulation of G1/S transition of mitotic cell cycle	-3.24355	11/39	Adamts1,Aif1,Akt1,Apex1,Ccnd1,Ccnd2,Ccne1,Cdc45,Mdm2,Dbf4,Rgcc
6_Member	GO Biological Processes	GO:1902808	positive regulation of cell cycle G1/S phase transition	-2.97245	12/48	Adamts1,Aif1,Akt1,Apex1,Ccnd1,Ccnd2,Ccne1,Cdc45,Ezh2,Mdm2,Dbf4,Rgcc
6_Member	GO Biological Processes	GO:2000134	negative regulation of G1/S transition of mitotic cell cycle	-2.56473	13/60	Bcl2,Ccnd1,Cdkn1a,Cdkn2b,Plk3,Ezh2,Prmt2,Mdm2,Ccl12,Sox4,E2f7,Dact1,Gpnmb
7_Summary	GO Biological Processes	GO:0031347	regulation of defense response	-19.1582	130/616	Acp5,Adam8,Apod,Apoe,Arf6,Arg1,Arg2,Slc7a2,C1qa,C5ar1,Cav1,Cd14,Cd28,Cd36,Cd6,Cd86,Cebpb,Socs3,Ccr1,Ccr5,Ccr7,Dnase1l3,Ednra,Ednrb,Gata3,Gfi1,Gja1,Hmgb3,Ier3,Ifng,Igf1,Cd74,Il10,Il12b,Il12rb1,Il18rap,Il1b,Il1r2,Il2ra,Il6,Acod1,Jak2,Lag3,Lamp1,Lrp8,Ltf,Il1rl1,Mmp12,Mmp2,Cd200,Gbp4,Nfkbia,Osm,Serpine1,Pmp22,Med1,Pparg,Ptger4,Ptgs2,Ptprs,Nectin2,Rab34,Rasgrp1,Rela,S100a8,S100a9,Ccl3,Ccl5,Cx3cl1,Serp…
7_Member	GO Biological Processes	GO:0031347	regulation of defense response	-19.1582	130/616	Acp5,Adam8,Apod,Apoe,Arf6,Arg1,Arg2,Slc7a2,C1qa,C5ar1,Cav1,Cd14,Cd28,Cd36,Cd6,Cd86,Cebpb,Socs3,Ccr1,Ccr5,Ccr7,Dnase1l3,Ednra,Ednrb,Gata3,Gfi1,Gja1,Hmgb3,Ier3,Ifng,Igf1,Cd74,Il10,Il12b,Il12rb1,Il18rap,Il1b,Il1r2,Il2ra,Il6,Acod1,Jak2,Lag3,Lamp1,Lrp8,Ltf,Il1rl1,Mmp12,Mmp2,Cd200,Gbp4,Nfkbia,Osm,Serpine1,Pmp22,Med1,Pparg,Ptger4,Ptgs2,Ptprs,Nectin2,Rab34,Rasgrp1,Rela,S100a8,S100a9,Ccl3,Ccl5,Cx3cl1,Serp…
7_Member	GO Biological Processes	GO:0031349	positive regulation of defense response	-14.1805	82/360	Adam8,Arf6,Arg1,C1qa,Cav1,Cd14,Cd28,Cd36,Cd6,Cd86,Cebpb,Ccr5,Ccr7,Ednra,Gfi1,Gja1,Hmgb3,Cd74,Il12b,Il18rap,Il1b,Il6,Acod1,Jak2,Lag3,Lamp1,Ltf,Il1rl1,Mmp12,Mmp2,Nfkbia,Osm,Serpine1,Med1,Ptger4,Ptgs2,Ptprs,Nectin2,Rab34,Rasgrp1,Rela,S100a8,S100a9,Ccl3,Ccl5,Sh2d1a,Tgm2,Tnf,Tnfaip3,Tnfrsf11a,Plscr1,Tnfsf4,Nr1h3,Xrcc5,Ets1,Tlr2,Klrk1,Slamf6,Mfhas1,Pvr,Tlr5,Cd160,Cadm1,Ccl24,Clec4e,Polr3d,Ulbp1,Zc3hav1…
7_Member	GO Biological Processes	GO:0045088	regulation of innate immune response	-10.1378	61/276	Adam8,Apoe,Arf6,Arg1,Cav1,Cd14,Cd36,Cd86,Ccr1,Gfi1,Hmgb3,Cd74,Il12b,Il18rap,Acod1,Lag3,Lamp1,Lrp8,Ltf,Mmp12,Mmp2,Nfkbia,Med1,Pparg,Ptprs,Nectin2,Rasgrp1,Rela,Sh2d1a,Serpinb9,Tnf,Tnfaip3,Plscr1,Nr1h3,Xrcc5,Tlr2,Klrk1,Slamf6,Mfhas1,Pvr,Tlr5,Cd160,Cadm1,Clec4e,Polr3d,Ulbp1,Zc3hav1,Klrb1b,Pik3ap1,Irak2,Tlr3,Havcr2,Gramd4,Rab7b,A2m,Ffar2,Cd300lf,Nlrc3,Tlr12,Tnip3,Otulin
7_Member	GO Biological Processes	GO:0045089	positive regulation of innate immune response	-9.25353	52/228	Adam8,Arf6,Cav1,Cd14,Cd36,Cd86,Gfi1,Hmgb3,Cd74,Il12b,Il18rap,Acod1,Lag3,Lamp1,Ltf,Mmp12,Mmp2,Nfkbia,Med1,Ptprs,Nectin2,Rasgrp1,Rela,Sh2d1a,Tnf,Tnfaip3,Plscr1,Nr1h3,Xrcc5,Tlr2,Klrk1,Slamf6,Mfhas1,Pvr,Tlr5,Cd160,Cadm1,Clec4e,Polr3d,Ulbp1,Zc3hav1,Pik3ap1,Irak2,Tlr3,Havcr2,Gramd4,Rab7b,Ffar2,Cd300lf,Tlr12,Tnip3,Otulin
7_Member	GO Biological Processes	GO:0002758	innate immune response-activating signal transduction	-5.85991	31/135	Arf6,Cav1,Cd14,Cd36,Cd86,Gfi1,Acod1,Ltf,Nfkbia,Ptprs,Rela,Tnf,Tnfaip3,Nr1h3,Tlr2,Klrk1,Mfhas1,Tlr5,Clec4e,Zc3hav1,Pik3ap1,Irak2,Tlr3,Havcr2,Gramd4,Rab7b,Ffar2,Cd300lf,Tlr12,Tnip3,Otulin
7_Member	GO Biological Processes	GO:0002224	toll-like receptor signaling pathway	-5.6396	25/99	Arf6,Cav1,Cd14,Cd36,Cd86,Gfi1,Acod1,Ltf,Nfkbia,Ptprs,Tnf,Tnfaip3,Nr1h3,Tlr2,Mfhas1,Tlr5,Pik3ap1,Irak2,Tlr3,Havcr2,Gramd4,Rab7b,Cd300lf,Tlr12,Tnip3
7_Member	GO Biological Processes	GO:0002221	pattern recognition receptor signaling pathway	-5.52234	30/133	Arf6,Cav1,Cd14,Cd36,Cd86,Gfi1,Acod1,Ltf,Nfkbia,Ptprs,Rela,Tnf,Tnfaip3,Nr1h3,Tlr2,Mfhas1,Tlr5,Clec4e,Zc3hav1,Pik3ap1,Irak2,Tlr3,Havcr2,Gramd4,Rab7b,Ffar2,Cd300lf,Tlr12,Tnip3,Otulin
7_Member	GO Biological Processes	GO:0002218	activation of innate immune response	-4.68982	32/160	Arf6,Cav1,Cd14,Cd36,Cd86,Gfi1,Acod1,Ltf,Nfkbia,Ptprs,Rela,Tnf,Tnfaip3,Nr1h3,Xrcc5,Tlr2,Klrk1,Mfhas1,Tlr5,Clec4e,Zc3hav1,Pik3ap1,Irak2,Tlr3,Havcr2,Gramd4,Rab7b,Ffar2,Cd300lf,Tlr12,Tnip3,Otulin
7_Member	GO Biological Processes	GO:0034121	regulation of toll-like receptor signaling pathway	-4.43056	17/63	Arf6,Cav1,Cd36,Gfi1,Acod1,Ltf,Ptprs,Tnfaip3,Nr1h3,Tlr2,Mfhas1,Tlr5,Pik3ap1,Tlr3,Gramd4,Rab7b,Cd300lf
7_Member	GO Biological Processes	GO:0034142	toll-like receptor 4 signaling pathway	-3.26778	10/33	Arf6,Cd14,Acod1,Ltf,Nfkbia,Nr1h3,Mfhas1,Pik3ap1,Rab7b,Tnip3
7_Member	GO Biological Processes	GO:0034123	positive regulation of toll-like receptor signaling pathway	-2.88484	8/25	Cav1,Ltf,Nr1h3,Tlr2,Mfhas1,Tlr5,Pik3ap1,Tlr3
7_Member	GO Biological Processes	GO:0034143	regulation of toll-like receptor 4 signaling pathway	-2.12517	6/20	Arf6,Acod1,Ltf,Nr1h3,Mfhas1,Rab7b
8_Summary	GO Biological Processes	GO:0002683	negative regulation of immune system process	-19.1145	108/466	Akt1,Apod,Arg1,Arg2,Prdm1,Zfp36l1,C1qc,Runx3,Ctla4,Cd22,Cd80,Cd86,Cdk6,Cebpb,Ccr1,Fer,Flt3,Gcsam,H2-Aa,H2-Ab1,H2-Oa,H2-Ob,Hes1,Hmgb3,Ifng,Igf1,Cd74,Il10,Il12b,Il2ra,Il4ra,Il7r,Acod1,Mafb,Lag3,Ldb1,Loxl3,Il1rl1,Smad7,Mertk,Kitl,Mmp12,Cd200,Myc,Nbl1,Nfkbia,Pdcd1,Pparg,Prnp,Ptger4,Dusp1,Ptprs,Ccl12,Cx3cl1,Sox9,Serpinb9,Sdc4,Tgfb2,Tgfb3,Thbs1,Tnf,Tnfaip3,Tnfrsf4,Tnfsf4,Nr1h3,Axl,Klrk1,Klf13,Il27ra,Mf…
8_Member	GO Biological Processes	GO:0002683	negative regulation of immune system process	-19.1145	108/466	Akt1,Apod,Arg1,Arg2,Prdm1,Zfp36l1,C1qc,Runx3,Ctla4,Cd22,Cd80,Cd86,Cdk6,Cebpb,Ccr1,Fer,Flt3,Gcsam,H2-Aa,H2-Ab1,H2-Oa,H2-Ob,Hes1,Hmgb3,Ifng,Igf1,Cd74,Il10,Il12b,Il2ra,Il4ra,Il7r,Acod1,Mafb,Lag3,Ldb1,Loxl3,Il1rl1,Smad7,Mertk,Kitl,Mmp12,Cd200,Myc,Nbl1,Nfkbia,Pdcd1,Pparg,Prnp,Ptger4,Dusp1,Ptprs,Ccl12,Cx3cl1,Sox9,Serpinb9,Sdc4,Tgfb2,Tgfb3,Thbs1,Tnf,Tnfaip3,Tnfrsf4,Tnfsf4,Nr1h3,Axl,Klrk1,Klf13,Il27ra,Mf…
8_Member	GO Biological Processes	GO:0007162	negative regulation of cell adhesion	-12.9231	67/278	Adam8,Angpt2,Akt1,Apod,Arg1,Arg2,Ass1,Runx3,Ctla4,Cd80,Cd86,Cd9,Cdh1,Cebpb,Bcar1,Ptk2,Fbln1,Fzd7,H2-Aa,H2-Ab1,Cd74,Il10,Il1rn,Il2ra,Il4ra,Jag1,Jak2,Lag3,Lef1,Loxl3,Epcam,Smad7,Mmp12,Mmp14,Mmp2,Pde3b,Enpp2,Serpine1,Plxna1,Prnp,Dusp1,Serpine2,Spint2,Sdc4,Thbs1,Tnfaip3,Tnfsf4,Plxnc1,Zc3h8,Tbx21,Pdcd1lg2,Cd274,Twsg1,Rgcc,Jam2,Dusp3,Gpnmb,Cd276,Kank1,Rcc2,Pawr,Dscaml1,Havcr2,Phldb2,Lax1,Nfkbid,Tigit
8_Member	GO Biological Processes	GO:0050866	negative regulation of cell activation	-12.3622	53/197	Apoe,Arg1,Arg2,Prdm1,Runx3,Ctla4,Cd80,Cd86,Cd9,Cebpb,Fer,Flt3,Gclc,H2-Aa,H2-Ab1,Hmgb3,Cd74,Il10,Il2ra,Il4ra,Lag3,Loxl3,Smad7,Mertk,Cd200,Pdgfa,Pdgfb,Pparg,Prnp,Cx3cl1,Serpine2,Sdc4,Tnfaip3,Tnfsf4,Nr1h3,Axl,Rabgef1,Zc3h8,Tbx21,Pdcd1lg2,Cd274,Twsg1,Dusp3,Gpnmb,Cd276,Pawr,Havcr2,Lax1,Nfkbid,Cd300lf,Rhbdd3,Pkn1,Tigit
8_Member	GO Biological Processes	GO:0002695	negative regulation of leukocyte activation	-10.823	47/177	Arg1,Arg2,Prdm1,Runx3,Ctla4,Cd80,Cd86,Cebpb,Fer,Flt3,H2-Aa,H2-Ab1,Hmgb3,Cd74,Il10,Il2ra,Il4ra,Lag3,Loxl3,Smad7,Mertk,Cd200,Pparg,Prnp,Cx3cl1,Sdc4,Tnfaip3,Tnfsf4,Nr1h3,Axl,Rabgef1,Zc3h8,Tbx21,Pdcd1lg2,Cd274,Twsg1,Dusp3,Gpnmb,Cd276,Pawr,Havcr2,Lax1,Nfkbid,Cd300lf,Rhbdd3,Pkn1,Tigit
8_Member	GO Biological Processes	GO:0022408	negative regulation of cell-cell adhesion	-10.4553	47/181	Adam8,Akt1,Arg1,Arg2,Ass1,Runx3,Ctla4,Cd80,Cd86,Cd9,Cdh1,Cebpb,Ptk2,H2-Aa,H2-Ab1,Cd74,Il10,Il1rn,Il2ra,Il4ra,Jag1,Jak2,Lag3,Lef1,Loxl3,Epcam,Smad7,Prnp,Serpine2,Spint2,Sdc4,Tnfaip3,Tnfsf4,Zc3h8,Tbx21,Pdcd1lg2,Cd274,Twsg1,Rgcc,Dusp3,Gpnmb,Cd276,Pawr,Havcr2,Lax1,Nfkbid,Tigit
8_Member	GO Biological Processes	GO:0051250	negative regulation of lymphocyte activation	-9.46971	40/149	Arg1,Arg2,Prdm1,Runx3,Ctla4,Cd80,Cd86,Cebpb,Flt3,H2-Aa,H2-Ab1,Hmgb3,Cd74,Il10,Il2ra,Il4ra,Lag3,Loxl3,Smad7,Mertk,Prnp,Sdc4,Tnfaip3,Tnfsf4,Axl,Zc3h8,Tbx21,Pdcd1lg2,Cd274,Twsg1,Dusp3,Gpnmb,Cd276,Pawr,Havcr2,Lax1,Nfkbid,Rhbdd3,Pkn1,Tigit
8_Member	GO Biological Processes	GO:1903038	negative regulation of leukocyte cell-cell adhesion	-8.02565	34/128	Adam8,Akt1,Arg1,Arg2,Ass1,Runx3,Ctla4,Cd80,Cd86,Cebpb,H2-Aa,H2-Ab1,Cd74,Il2ra,Il4ra,Lag3,Loxl3,Smad7,Prnp,Sdc4,Tnfsf4,Zc3h8,Tbx21,Pdcd1lg2,Cd274,Twsg1,Dusp3,Gpnmb,Cd276,Pawr,Havcr2,Lax1,Nfkbid,Tigit
8_Member	GO Biological Processes	GO:0050868	negative regulation of T cell activation	-7.44451	31/116	Arg1,Arg2,Runx3,Ctla4,Cd80,Cd86,Cebpb,H2-Aa,H2-Ab1,Cd74,Il2ra,Il4ra,Lag3,Loxl3,Smad7,Prnp,Sdc4,Tnfsf4,Zc3h8,Tbx21,Pdcd1lg2,Cd274,Twsg1,Dusp3,Gpnmb,Cd276,Pawr,Havcr2,Lax1,Nfkbid,Tigit
8_Member	GO Biological Processes	GO:0070664	negative regulation of leukocyte proliferation	-4.96459	22/88	Arg1,Arg2,Prdm1,Ctla4,Cd80,Cd86,Cebpb,H2-Aa,H2-Ab1,Il10,Il2ra,Prnp,Ccl12,Sdc4,Pdcd1lg2,Cd274,Twsg1,Gpnmb,Cd276,Pawr,Havcr2,Pkn1
8_Member	GO Biological Processes	GO:0032945	negative regulation of mononuclear cell proliferation	-4.7676	21/84	Arg1,Arg2,Prdm1,Ctla4,Cd80,Cd86,Cebpb,H2-Aa,H2-Ab1,Il10,Il2ra,Prnp,Sdc4,Pdcd1lg2,Cd274,Twsg1,Gpnmb,Cd276,Pawr,Havcr2,Pkn1
8_Member	GO Biological Processes	GO:0050672	negative regulation of lymphocyte proliferation	-4.7676	21/84	Arg1,Arg2,Prdm1,Ctla4,Cd80,Cd86,Cebpb,H2-Aa,H2-Ab1,Il10,Il2ra,Prnp,Sdc4,Pdcd1lg2,Cd274,Twsg1,Gpnmb,Cd276,Pawr,Havcr2,Pkn1
8_Member	GO Biological Processes	GO:0042130	negative regulation of T cell proliferation	-4.34916	18/70	Arg1,Arg2,Ctla4,Cd80,Cd86,Cebpb,H2-Aa,H2-Ab1,Il2ra,Prnp,Sdc4,Pdcd1lg2,Cd274,Twsg1,Gpnmb,Cd276,Pawr,Havcr2
9_Summary	GO Biological Processes	GO:0051301	cell division	-19.1007	123/568	Birc5,Arf6,Rhoc,Bmi1,Bub1,Bub1b,Ccna2,Ccnb2,Ccnd1,Ccnd2,Ccne1,Ccnf,Cdc25a,Cdc25c,Cdk1,Cdc7,Cdk6,Cenpa,Cit,Plk3,Ect2,Epb41l2,Fgf1,Fgf13,Fgfr1,Smc2,Fzd7,Cdca3,Htr2b,Il1a,Il1b,Kif11,Kif4,Kit,Stmn1,Lef1,Lig1,Myb,Myc,Ncoa3,Nek2,Nup62,Pdgfa,Pdgfb,Cdk14,Plk1,Ptn,Kif20a,Plk2,Aurka,Tacc3,Tgfa,Tgfb2,Tgfb3,Top2a,Vegfb,Wee1,Sept3,Zw10,Gnl3,Fubp1,Cdca8,Ppp2r2d,E2f7,Cks1b,Spag5,Sept1,Mad2l1,Pdxp,Nek6,Cables1,S…
9_Member	GO Biological Processes	GO:0051301	cell division	-19.1007	123/568	Birc5,Arf6,Rhoc,Bmi1,Bub1,Bub1b,Ccna2,Ccnb2,Ccnd1,Ccnd2,Ccne1,Ccnf,Cdc25a,Cdc25c,Cdk1,Cdc7,Cdk6,Cenpa,Cit,Plk3,Ect2,Epb41l2,Fgf1,Fgf13,Fgfr1,Smc2,Fzd7,Cdca3,Htr2b,Il1a,Il1b,Kif11,Kif4,Kit,Stmn1,Lef1,Lig1,Myb,Myc,Ncoa3,Nek2,Nup62,Pdgfa,Pdgfb,Cdk14,Plk1,Ptn,Kif20a,Plk2,Aurka,Tacc3,Tgfa,Tgfb2,Tgfb3,Top2a,Vegfb,Wee1,Sept3,Zw10,Gnl3,Fubp1,Cdca8,Ppp2r2d,E2f7,Cks1b,Spag5,Sept1,Mad2l1,Pdxp,Nek6,Cables1,S…
9_Member	GO Biological Processes	GO:0140014	mitotic nuclear division	-11.8717	64/272	Birc5,Bub1,Bub1b,Ccna2,Ccnb2,Ccnd1,Ccnd2,Ccne1,Ccnf,Cd28,Chek1,Cit,Smc2,Igf1,Il1a,Il1b,Kif11,Kif4,Mki67,Mybl2,Nek2,Nup62,Pdgfb,Plk1,Sphk1,Aurka,Tacc3,Tgfa,Tnf,Ttk,Ywhah,Zw10,Cdca8,Spag5,Akap8l,Ncapg,Mad2l1,Pdxp,Nek6,Rgcc,Dsn1,Nuf2,Ndc80,Fbxo5,Ctdp1,Cdca5,Ncapd2,Bod1,Trip13,Kif18b,Tpx2,Sgo1,Kif2c,Klhdc8b,Ndel1,Cdc20,Kif22,Hspa1a,Ncaph,Cenpe,Phf13,Arhgef10,Kif20b,Ccnb1
9_Member	Reactome Gene Sets	R-MMU-69620	Cell Cycle Checkpoints	-10.7919	54/221	Birc5,Bub1,Bub1b,Ccna2,Ccnb2,Ccne1,Cdc25a,Cdc25c,Cdk1,Cdc45,Cdc7,Cdkn1a,Cenpa,Chek1,Mcm3,Mcm2,Mcm4,Mcm5,Mcm6,Mcm7,Mdm2,Plk1,Ppp2ca,Ywhah,Zw10,Dbf4,Trp53bp1,Gtse1,Cdca8,Mad2l1,Spc25,Ska1,Cenpm,Dsn1,Nuf2,Ndc80,Spc24,Dynll2,Sgo2a,Rfc3,Mcm10,Sgo1,Kif2c,Ndel1,Cenpi,Nsd2,Cdc20,Cenpf,Rcc2,Kntc1,Cenpe,Ccnb1,Pkmyt1,Nup98
9_Member	Reactome Gene Sets	R-MMU-69278	Cell Cycle, Mitotic	-10.7152	91/481	Birc5,Bub1,Bub1b,Ccna2,Ccnb2,Ccnd1,Ccnd2,Ccne1,Cdc25a,Cdc25c,Cdk1,Cdc45,Cdc7,Cdk6,Cdkn1a,Cdkn2b,Cenpa,Smc2,Foxm1,Hmmr,Jak2,Lig1,Lmna,Lmnb1,Mcm3,Mcm2,Mcm4,Mcm5,Mcm6,Mcm7,Nek2,Nup62,Prkaca,Prkcb,Plk1,Pola2,Pole,Ppp2ca,Prim1,Kif20a,Aurka,Tubb4a,Tubb5,Wee1,Zw10,Dbf4,Csnk1e,Gtse1,Cdca8,Ncapg,Set,Mad2l1,Nek6,Cables1,Spc25,Ska1,Cenpm,Dsn1,Nuf2,Ndc80,Fbxo5,Spc24,Cdca5,Dynll2,Ncapd2,Sgo2a,Rfc3,Mcm10,Tpx2,…
9_Member	Reactome Gene Sets	R-MMU-1640170	Cell Cycle	-10.483	97/531	Birc5,Bub1,Bub1b,Ccna2,Ccnb2,Ccnd1,Ccnd2,Ccne1,Cdc25a,Cdc25c,Cdk1,Cdc45,Cdc7,Cdk6,Cdkn1a,Cdkn2b,Cenpa,Chek1,Smc2,Foxm1,Hmmr,Jak2,Lig1,Lmna,Lmnb1,Mcm3,Mcm2,Mcm4,Mcm5,Mcm6,Mcm7,Mdm2,Nek2,Nup62,Prkaca,Prkcb,Plk1,Pola2,Pole,Ppp2ca,Prim1,Kif20a,Aurka,Tubb4a,Tubb5,Wee1,Ywhah,Zw10,Dbf4,Trp53bp1,Csnk1e,Gtse1,Cdca8,Ncapg,Set,Mad2l1,Nek6,Cables1,Spc25,Ska1,Cenpm,Dsn1,Nuf2,Ndc80,Fbxo5,Spc24,Cdca5,Dynll2,Nca…
9_Member	GO Biological Processes	GO:0045786	negative regulation of cell cycle	-10.3945	86/450	Ak1,Apbb2,Birc5,Nr2f2,Bcl2,Zfp36l1,Btg1,Btg2,Btg3,Bub1,Bub1b,Runx3,Ccnd1,Ccnf,Cdk1,Cdk6,Cdkn1a,Cdkn2b,Chek1,Plk3,Ddit3,Ezh2,Foxm1,Gas1,Gata3,Nr4a1,Hras,Prmt2,Ier3,Ifng,Il12b,Inhba,Lif,Mdm2,Mlf1,Myc,Nek2,Osm,Pea15a,Prkaca,Plk1,Pmp22,Ptgs2,Ptprk,Rps6ka2,Ccl12,Skil,Plk2,Sox4,Tcf7l2,Tgfb2,Thbs1,Timp2,Tnf,Tnfaip3,Top2a,Ppp1r13b,Ttk,Wee1,Ets1,Zw10,Eif2ak4,Trp53bp1,Bin1,E2f7,Mad2l1,Mlxipl,Dact1,Donson,R…
9_Member	GO Biological Processes	GO:0000280	nuclear division	-9.69168	80/419	Birc5,Bub1,Bub1b,Ccna2,Ccnb2,Ccnd1,Ccnd2,Ccne1,Ccnf,Cd28,Chek1,Cit,Smc2,Igf1,Il1a,Il1b,Kif11,Kif4,Lif,Mki67,Msx1,Mybl2,Nek2,Nup62,Osm,Pdgfb,Plk1,Rad51,Rps6ka2,Sphk1,Aurka,Tacc3,Tgfa,Tnf,Top2a,Ttk,Ywhah,Zw10,Stag3,Cdca8,Spag5,Akap8l,Sept1,Ncapg,Mad2l1,Pdxp,Piwil2,Nek6,Fignl1,Rgcc,Dsn1,Nuf2,Ndc80,Fbxo5,Ctdp1,Cdca5,Spire1,Ncapd2,Sgo2a,Bod1,Trip13,Kif18b,Syce2,Tpx2,Sgo1,Ndc1,Kif2c,Klhdc8b,Ndel1,Fancm…
9_Member	GO Biological Processes	GO:0007059	chromosome segregation	-9.29304	64/310	Birc5,Bub1,Bub1b,Ccne1,Cit,Ect2,Smc2,Gem,Kif4,Mki67,Nek2,Nup62,Plk1,Srpk1,Tacc3,Top2a,Ttk,Zw10,Stag3,Cdca8,Spag5,Akap8l,Sept1,Ncapg,Mad2l1,Brd4,Rad18,Nek6,Spc25,Ska1,Dsn1,Nuf2,Ndc80,Fbxo5,Cdca5,Ncapd2,Sgo2a,Arl8a,Bod1,Trip13,Ttl,Kif18b,Oip5,Syce2,Sgo1,Ndc1,Kif2c,Knl1,Klhdc8b,Ndel1,Fancm,Cdc20,Cenpf,Rcc2,Cdca2,Kif22,Mcmbp,Chtf18,Ncaph,Ska3,Cenpe,Phf13,Ccnb1,Ddx11
9_Member	Reactome Gene Sets	R-MMU-68877	Mitotic Prometaphase	-8.64631	45/190	Birc5,Bub1,Bub1b,Ccnb2,Cdk1,Cenpa,Smc2,Nek2,Prkaca,Plk1,Ppp2ca,Tubb4a,Tubb5,Zw10,Csnk1e,Cdca8,Ncapg,Mad2l1,Spc25,Ska1,Cenpm,Dsn1,Nuf2,Ndc80,Spc24,Cdca5,Dynll2,Ncapd2,Sgo2a,Sgo1,Kif2c,Ninl,Ndel1,Cep41,Cep152,Cenpi,Cdc20,Cenpf,Rcc2,Kntc1,Ncaph,Cenpe,Tubgcp5,Ccnb1,Nup98
9_Member	GO Biological Processes	GO:0048285	organelle fission	-8.17225	82/466	Birc5,Bub1,Bub1b,Ccna2,Ccnb2,Ccnd1,Ccnd2,Ccne1,Ccnf,Cd28,Chek1,Cit,Smc2,Igf1,Il1a,Il1b,Kdr,Kif11,Kif4,Lif,Mki67,Msx1,Mybl2,Nek2,Nup62,Osm,Pdgfb,Plk1,Rad51,Rps6ka2,Sphk1,Aurka,Tacc3,Tgfa,Tnf,Top2a,Ttk,Ywhah,Zw10,Stag3,Cdca8,Spag5,Akap8l,Sept1,Ncapg,Mad2l1,Pdxp,Piwil2,Nek6,Fignl1,Rgcc,Dsn1,Nuf2,Ndc80,Fbxo5,Ctdp1,Cdca5,Spire1,Ncapd2,Sgo2a,Bod1,Trip13,Kif18b,Syce2,Tpx2,Sgo1,Ndc1,Kif2c,Klhdc8b,Gimap3,…
9_Member	Reactome Gene Sets	R-MMU-2500257	Resolution of Sister Chromatid Cohesion	-8.1199	33/121	Birc5,Bub1,Bub1b,Ccnb2,Cdk1,Cenpa,Plk1,Ppp2ca,Tubb4a,Zw10,Cdca8,Mad2l1,Spc25,Ska1,Cenpm,Dsn1,Nuf2,Ndc80,Spc24,Cdca5,Dynll2,Sgo2a,Sgo1,Kif2c,Ndel1,Cenpi,Cdc20,Cenpf,Rcc2,Kntc1,Cenpe,Ccnb1,Nup98
9_Member	GO Biological Processes	GO:0051783	regulation of nuclear division	-8.082	47/211	Birc5,Bub1,Bub1b,Ccna2,Ccnb2,Ccnd1,Ccnd2,Ccne1,Ccnf,Cd28,Chek1,Cit,Igf1,Il1a,Il1b,Kif11,Lif,Mki67,Msx1,Nek2,Nup62,Osm,Pdgfb,Plk1,Rps6ka2,Sphk1,Tacc3,Tgfa,Tnf,Ttk,Ywhah,Zw10,Mad2l1,Pdxp,Piwil2,Nek6,Rgcc,Ndc80,Fbxo5,Cdca5,Sgo2a,Trip13,Cdc20,Hspa1a,Cenpe,Kif20b,Ccnb1
9_Member	Reactome Gene Sets	R-MMU-141444	Amplification of signal from unattached kinetochores via a MAD2 inhibitory signal	-7.68284	28/96	Birc5,Bub1,Bub1b,Cenpa,Plk1,Ppp2ca,Zw10,Cdca8,Mad2l1,Spc25,Ska1,Cenpm,Dsn1,Nuf2,Ndc80,Spc24,Dynll2,Sgo2a,Sgo1,Kif2c,Ndel1,Cenpi,Cdc20,Cenpf,Rcc2,Kntc1,Cenpe,Nup98
9_Member	Reactome Gene Sets	R-MMU-141424	Amplification of signal from the kinetochores	-7.68284	28/96	Birc5,Bub1,Bub1b,Cenpa,Plk1,Ppp2ca,Zw10,Cdca8,Mad2l1,Spc25,Ska1,Cenpm,Dsn1,Nuf2,Ndc80,Spc24,Dynll2,Sgo2a,Sgo1,Kif2c,Ndel1,Cenpi,Cdc20,Cenpf,Rcc2,Kntc1,Cenpe,Nup98
9_Member	GO Biological Processes	GO:0098813	nuclear chromosome segregation	-7.49141	52/255	Birc5,Bub1,Bub1b,Ccne1,Cit,Ect2,Smc2,Gem,Kif4,Nek2,Nup62,Plk1,Tacc3,Top2a,Ttk,Zw10,Stag3,Cdca8,Spag5,Akap8l,Sept1,Ncapg,Mad2l1,Nek6,Dsn1,Nuf2,Ndc80,Fbxo5,Cdca5,Ncapd2,Sgo2a,Bod1,Trip13,Ttl,Kif18b,Syce2,Sgo1,Ndc1,Kif2c,Knl1,Klhdc8b,Fancm,Cdc20,Cenpf,Rcc2,Kif22,Mcmbp,Ncaph,Cenpe,Phf13,Ccnb1,Ddx11
9_Member	Reactome Gene Sets	R-MMU-5663220	RHO GTPases Activate Formins	-7.39778	34/135	Birc5,Rhoc,Bub1,Bub1b,Cenpa,Dvl3,Plk1,Ppp2ca,Rac1,Tubb4a,Fmnl3,Zw10,Cdca8,Mad2l1,Spc25,Ska1,Cenpm,Dsn1,Nuf2,Ndc80,Spc24,Dynll2,Sgo2a,Fmnl2,Sgo1,Kif2c,Ndel1,Cenpi,Cdc20,Cenpf,Rcc2,Kntc1,Cenpe,Nup98
9_Member	GO Biological Processes	GO:0000070	mitotic sister chromatid segregation	-7.17655	35/144	Birc5,Bub1,Bub1b,Cit,Smc2,Kif4,Nek2,Nup62,Plk1,Tacc3,Ttk,Zw10,Cdca8,Spag5,Akap8l,Ncapg,Mad2l1,Nek6,Dsn1,Nuf2,Ndc80,Fbxo5,Cdca5,Ncapd2,Bod1,Trip13,Kif18b,Sgo1,Kif2c,Cdc20,Kif22,Ncaph,Cenpe,Phf13,Ccnb1
9_Member	GO Biological Processes	GO:0000819	sister chromatid segregation	-7.09083	40/178	Birc5,Bub1,Bub1b,Cit,Smc2,Kif4,Nek2,Nup62,Plk1,Tacc3,Top2a,Ttk,Zw10,Stag3,Cdca8,Spag5,Akap8l,Ncapg,Mad2l1,Nek6,Dsn1,Nuf2,Ndc80,Fbxo5,Cdca5,Ncapd2,Sgo2a,Bod1,Trip13,Kif18b,Sgo1,Kif2c,Cdc20,Kif22,Mcmbp,Ncaph,Cenpe,Phf13,Ccnb1,Ddx11
9_Member	Reactome Gene Sets	R-MMU-194315	Signaling by Rho GTPases	-7.03099	74/430	Birc5,Rhoc,Arhgap5,Bub1,Bub1b,Cdc25c,Cdh1,Cenpa,Cit,Dvl3,Ect2,Ptk2,Grb2,Plk1,Ppp2ca,Rac1,Rock2,S100a8,S100a9,Tubb4a,Vav2,Fmnl3,Ywhah,Zw10,Cdca8,Mad2l1,Net1,Vav3,Fam13a,Spc25,Ska1,Cenpm,Dsn1,Nuf2,Ndc80,Spc24,Dynll2,Ppp1r14a,Sgo2a,Rhobtb1,Chn2,Arhgap19,Fmnl2,Sgo1,Kif2c,Arhgap18,Rhoh,Ndel1,Ophn1,Kdm1a,Cenpi,Cdc20,Cenpf,Baiap2,Rcc2,Rac3,Kntc1,Arap2,Depdc1b,Rhov,Cenpe,Arhgef39,A2m,Prc1,Arhgef10,Arhgap…
9_Member	GO Biological Processes	GO:0007088	regulation of mitotic nuclear division	-7.02077	40/179	Birc5,Bub1,Bub1b,Ccna2,Ccnb2,Ccnd1,Ccnd2,Ccne1,Ccnf,Cd28,Chek1,Cit,Igf1,Il1a,Il1b,Kif11,Mki67,Nek2,Nup62,Pdgfb,Plk1,Sphk1,Tacc3,Tgfa,Tnf,Ttk,Ywhah,Zw10,Mad2l1,Pdxp,Nek6,Rgcc,Ndc80,Fbxo5,Cdca5,Trip13,Hspa1a,Cenpe,Kif20b,Ccnb1
9_Member	GO Biological Processes	GO:0051983	regulation of chromosome segregation	-6.47989	27/102	Birc5,Bub1,Bub1b,Cit,Ect2,Mki67,Nek2,Plk1,Tacc3,Ttk,Zw10,Spag5,Mad2l1,Rad18,Nek6,Ndc80,Fbxo5,Cdca5,Sgo2a,Trip13,Ttl,Kif2c,Rcc2,Chtf18,Cenpe,Ccnb1,Ddx11
9_Member	Reactome Gene Sets	R-MMU-68886	M Phase	-6.33121	57/314	Birc5,Bub1,Bub1b,Ccnb2,Cdk1,Cenpa,Smc2,Lmna,Lmnb1,Nek2,Nup62,Prkaca,Prkcb,Plk1,Ppp2ca,Kif20a,Tubb4a,Tubb5,Zw10,Csnk1e,Cdca8,Ncapg,Set,Mad2l1,Nek6,Spc25,Ska1,Cenpm,Dsn1,Nuf2,Ndc80,Fbxo5,Spc24,Cdca5,Dynll2,Ncapd2,Sgo2a,Sgo1,Ndc1,Kif2c,Ncapg2,Ninl,Ndel1,Cep41,Cep152,Cenpi,Pom121,Cdc20,Cenpf,Rcc2,Kntc1,Ncaph,Lemd2,Cenpe,Tubgcp5,Ccnb1,Nup98
9_Member	Reactome Gene Sets	R-MMU-69618	Mitotic Spindle Checkpoint	-6.14132	28/112	Birc5,Bub1,Bub1b,Cenpa,Plk1,Ppp2ca,Zw10,Cdca8,Mad2l1,Spc25,Ska1,Cenpm,Dsn1,Nuf2,Ndc80,Spc24,Dynll2,Sgo2a,Sgo1,Kif2c,Ndel1,Cenpi,Cdc20,Cenpf,Rcc2,Kntc1,Cenpe,Nup98
9_Member	GO Biological Processes	GO:1901988	negative regulation of cell cycle phase transition	-6.06481	35/159	Birc5,Bcl2,Zfp36l1,Bub1,Bub1b,Ccnd1,Cdk1,Cdkn1a,Cdkn2b,Chek1,Plk3,Ezh2,Gas1,Prmt2,Ier3,Mdm2,Plk1,Ccl12,Sox4,Ttk,Zw10,E2f7,Mad2l1,Dact1,Donson,Rgcc,Ndc80,Fbxo5,Trip13,Susd2,Dtl,Ticrr,Gpnmb,Cenpe,Ccnb1
9_Member	GO Biological Processes	GO:1901991	negative regulation of mitotic cell cycle phase transition	-5.83664	32/142	Birc5,Bcl2,Zfp36l1,Bub1,Bub1b,Ccnd1,Cdk1,Cdkn1a,Cdkn2b,Chek1,Plk3,Ezh2,Prmt2,Ier3,Mdm2,Plk1,Ccl12,Sox4,Ttk,Zw10,E2f7,Mad2l1,Dact1,Donson,Rgcc,Ndc80,Fbxo5,Trip13,Ticrr,Gpnmb,Cenpe,Ccnb1
9_Member	Reactome Gene Sets	R-MMU-2555396	Mitotic Metaphase and Anaphase	-5.30235	31/143	Birc5,Bub1,Bub1b,Cenpa,Plk1,Ppp2ca,Tubb4a,Zw10,Cdca8,Mad2l1,Spc25,Ska1,Cenpm,Dsn1,Nuf2,Ndc80,Fbxo5,Spc24,Cdca5,Dynll2,Sgo2a,Sgo1,Kif2c,Ndel1,Cenpi,Cdc20,Cenpf,Rcc2,Kntc1,Cenpe,Nup98
9_Member	Reactome Gene Sets	R-MMU-2467813	Separation of Sister Chromatids	-5.11211	30/139	Birc5,Bub1,Bub1b,Cenpa,Plk1,Ppp2ca,Tubb4a,Zw10,Cdca8,Mad2l1,Spc25,Ska1,Cenpm,Dsn1,Nuf2,Ndc80,Spc24,Cdca5,Dynll2,Sgo2a,Sgo1,Kif2c,Ndel1,Cenpi,Cdc20,Cenpf,Rcc2,Kntc1,Cenpe,Nup98
9_Member	GO Biological Processes	GO:0045930	negative regulation of mitotic cell cycle	-5.07714	43/234	Birc5,Bcl2,Zfp36l1,Btg1,Btg2,Btg3,Bub1,Bub1b,Ccnd1,Cdk1,Cdkn1a,Cdkn2b,Chek1,Plk3,Ezh2,Gas1,Hras,Prmt2,Ier3,Mdm2,Plk1,Ccl12,Plk2,Sox4,Timp2,Tnf,Top2a,Ttk,Wee1,Zw10,E2f7,Mad2l1,Dact1,Donson,Rgcc,Ndc80,Fbxo5,Trip13,Ticrr,Gpnmb,Kntc1,Cenpe,Ccnb1
9_Member	Reactome Gene Sets	R-MMU-68882	Mitotic Anaphase	-4.91861	30/142	Birc5,Bub1,Bub1b,Cenpa,Plk1,Ppp2ca,Tubb4a,Zw10,Cdca8,Mad2l1,Spc25,Ska1,Cenpm,Dsn1,Nuf2,Ndc80,Spc24,Cdca5,Dynll2,Sgo2a,Sgo1,Kif2c,Ndel1,Cenpi,Cdc20,Cenpf,Rcc2,Kntc1,Cenpe,Nup98
9_Member	GO Biological Processes	GO:0010948	negative regulation of cell cycle process	-4.78154	41/225	Birc5,Bcl2,Zfp36l1,Bub1,Bub1b,Ccnd1,Ccnf,Cdk1,Cdkn1a,Cdkn2b,Chek1,Plk3,Ezh2,Gas1,Prmt2,Ier3,Lif,Mdm2,Nek2,Osm,Plk1,Rps6ka2,Ccl12,Sox4,Ttk,Zw10,E2f7,Mad2l1,Mlxipl,Dact1,Donson,Rgcc,Ndc80,Fbxo5,Trip13,Susd2,Dtl,Ticrr,Gpnmb,Cenpe,Ccnb1
9_Member	GO Biological Processes	GO:0007093	mitotic cell cycle checkpoint	-4.416	27/129	Birc5,Bub1,Bub1b,Ccnd1,Cdk1,Cdkn1a,Cdkn2b,Chek1,Plk3,Hras,Ier3,Mdm2,Plk1,Plk2,Sox4,Top2a,Ttk,Wee1,Zw10,Mad2l1,Donson,Ndc80,Trip13,Ticrr,Kntc1,Cenpe,Ccnb1
9_Member	Reactome Gene Sets	R-MMU-195258	RHO GTPase Effectors	-4.19618	49/302	Birc5,Rhoc,Bub1,Bub1b,Cdc25c,Cdh1,Cenpa,Cit,Dvl3,Ptk2,Grb2,Plk1,Ppp2ca,Rac1,Rock2,S100a8,S100a9,Tubb4a,Fmnl3,Ywhah,Zw10,Cdca8,Mad2l1,Spc25,Ska1,Cenpm,Dsn1,Nuf2,Ndc80,Spc24,Dynll2,Ppp1r14a,Sgo2a,Fmnl2,Sgo1,Kif2c,Ndel1,Kdm1a,Cenpi,Cdc20,Cenpf,Baiap2,Rcc2,Kntc1,Cenpe,Prc1,Nup98,Pkn1,Iqgap3
9_Member	GO Biological Processes	GO:0051784	negative regulation of nuclear division	-4.15094	17/66	Birc5,Bub1,Bub1b,Chek1,Lif,Osm,Plk1,Rps6ka2,Ttk,Zw10,Mad2l1,Rgcc,Ndc80,Fbxo5,Trip13,Cenpe,Ccnb1
9_Member	GO Biological Processes	GO:0007091	metaphase/anaphase transition of mitotic cell cycle	-4.0364	15/55	Birc5,Bub1,Bub1b,Cit,Plk1,Tacc3,Ttk,Zw10,Mad2l1,Nek6,Ndc80,Fbxo5,Trip13,Cenpe,Ccnb1
9_Member	GO Biological Processes	GO:0010965	regulation of mitotic sister chromatid separation	-3.93918	15/56	Birc5,Bub1,Bub1b,Cit,Plk1,Tacc3,Ttk,Zw10,Mad2l1,Nek6,Ndc80,Fbxo5,Trip13,Cenpe,Ccnb1
9_Member	GO Biological Processes	GO:0045841	negative regulation of mitotic metaphase/anaphase transition	-3.88554	12/39	Birc5,Bub1,Bub1b,Plk1,Ttk,Zw10,Mad2l1,Ndc80,Fbxo5,Trip13,Cenpe,Ccnb1
9_Member	GO Biological Processes	GO:0000075	cell cycle checkpoint	-3.85508	32/176	Birc5,Bub1,Bub1b,Ccnd1,Cdk1,Cdkn1a,Cdkn2b,Chek1,Plk3,Hras,Ier3,Mdm2,Pea15a,Plk1,Plk2,Sox4,Top2a,Ttk,Wee1,Zw10,Eif2ak4,Trp53bp1,Mad2l1,Donson,Ndc80,Trip13,Dtl,Ticrr,Kntc1,Wac,Cenpe,Ccnb1
9_Member	GO Biological Processes	GO:2000816	negative regulation of mitotic sister chromatid separation	-3.76827	12/40	Birc5,Bub1,Bub1b,Plk1,Ttk,Zw10,Mad2l1,Ndc80,Fbxo5,Trip13,Cenpe,Ccnb1
9_Member	GO Biological Processes	GO:0044784	metaphase/anaphase transition of cell cycle	-3.75291	15/58	Birc5,Bub1,Bub1b,Cit,Plk1,Tacc3,Ttk,Zw10,Mad2l1,Nek6,Ndc80,Fbxo5,Trip13,Cenpe,Ccnb1
9_Member	GO Biological Processes	GO:1902100	negative regulation of metaphase/anaphase transition of cell cycle	-3.65549	12/41	Birc5,Bub1,Bub1b,Plk1,Ttk,Zw10,Mad2l1,Ndc80,Fbxo5,Trip13,Cenpe,Ccnb1
9_Member	GO Biological Processes	GO:0051306	mitotic sister chromatid separation	-3.5768	15/60	Birc5,Bub1,Bub1b,Cit,Plk1,Tacc3,Ttk,Zw10,Mad2l1,Nek6,Ndc80,Fbxo5,Trip13,Cenpe,Ccnb1
9_Member	GO Biological Processes	GO:0045839	negative regulation of mitotic nuclear division	-3.55294	14/54	Birc5,Bub1,Bub1b,Chek1,Plk1,Ttk,Zw10,Mad2l1,Rgcc,Ndc80,Fbxo5,Trip13,Cenpe,Ccnb1
9_Member	GO Biological Processes	GO:1905819	negative regulation of chromosome separation	-3.54694	12/42	Birc5,Bub1,Bub1b,Plk1,Ttk,Zw10,Mad2l1,Ndc80,Fbxo5,Trip13,Cenpe,Ccnb1
9_Member	GO Biological Processes	GO:0051985	negative regulation of chromosome segregation	-3.5414	13/48	Birc5,Bub1,Bub1b,Plk1,Ttk,Zw10,Mad2l1,Ndc80,Fbxo5,Trip13,Chtf18,Cenpe,Ccnb1
9_Member	GO Biological Processes	GO:0033045	regulation of sister chromatid segregation	-3.47866	18/81	Birc5,Bub1,Bub1b,Cit,Plk1,Tacc3,Ttk,Zw10,Mad2l1,Nek6,Ndc80,Fbxo5,Cdca5,Sgo2a,Trip13,Cenpe,Ccnb1,Ddx11
9_Member	GO Biological Processes	GO:0031577	spindle checkpoint	-3.46132	11/37	Birc5,Bub1,Bub1b,Plk1,Ttk,Zw10,Mad2l1,Ndc80,Trip13,Cenpe,Ccnb1
9_Member	GO Biological Processes	GO:0071174	mitotic spindle checkpoint	-3.46132	11/37	Birc5,Bub1,Bub1b,Plk1,Ttk,Zw10,Mad2l1,Ndc80,Trip13,Cenpe,Ccnb1
9_Member	GO Biological Processes	GO:0007094	mitotic spindle assembly checkpoint	-3.46132	11/37	Birc5,Bub1,Bub1b,Plk1,Ttk,Zw10,Mad2l1,Ndc80,Trip13,Cenpe,Ccnb1
9_Member	GO Biological Processes	GO:0071173	spindle assembly checkpoint	-3.46132	11/37	Birc5,Bub1,Bub1b,Plk1,Ttk,Zw10,Mad2l1,Ndc80,Trip13,Cenpe,Ccnb1
9_Member	GO Biological Processes	GO:0033048	negative regulation of mitotic sister chromatid segregation	-3.44239	12/43	Birc5,Bub1,Bub1b,Plk1,Ttk,Zw10,Mad2l1,Ndc80,Fbxo5,Trip13,Cenpe,Ccnb1
9_Member	GO Biological Processes	GO:1905818	regulation of chromosome separation	-3.41007	15/62	Birc5,Bub1,Bub1b,Cit,Plk1,Tacc3,Ttk,Zw10,Mad2l1,Nek6,Ndc80,Fbxo5,Trip13,Cenpe,Ccnb1
9_Member	GO Biological Processes	GO:0030071	regulation of mitotic metaphase/anaphase transition	-3.26212	13/51	Birc5,Bub1,Bub1b,Plk1,Ttk,Zw10,Mad2l1,Nek6,Ndc80,Fbxo5,Trip13,Cenpe,Ccnb1
9_Member	GO Biological Processes	GO:0033046	negative regulation of sister chromatid segregation	-3.2444	12/45	Birc5,Bub1,Bub1b,Plk1,Ttk,Zw10,Mad2l1,Ndc80,Fbxo5,Trip13,Cenpe,Ccnb1
9_Member	GO Biological Processes	GO:0051304	chromosome separation	-3.15233	19/93	Birc5,Bub1,Bub1b,Cit,Plk1,Tacc3,Top2a,Ttk,Zw10,Mad2l1,Nek6,Ndc80,Fbxo5,Ncapd2,Trip13,Fancm,Ncaph,Cenpe,Ccnb1
9_Member	GO Biological Processes	GO:0033047	regulation of mitotic sister chromatid segregation	-3.02997	15/67	Birc5,Bub1,Bub1b,Cit,Plk1,Tacc3,Ttk,Zw10,Mad2l1,Nek6,Ndc80,Fbxo5,Trip13,Cenpe,Ccnb1
9_Member	GO Biological Processes	GO:1902099	regulation of metaphase/anaphase transition of cell cycle	-3.00827	13/54	Birc5,Bub1,Bub1b,Plk1,Ttk,Zw10,Mad2l1,Nek6,Ndc80,Fbxo5,Trip13,Cenpe,Ccnb1
9_Member	GO Biological Processes	GO:0033044	regulation of chromosome organization	-2.8802	50/352	Birc5,Hnrnpd,Bub1,Bub1b,Cdc45,Chek1,Cit,Ctbp1,Gata3,Gfi1,Lif,Lmna,Mcm2,Mki67,Myb,Myc,Nek2,Prkcq,Plk1,Upf1,Slk,Tacc3,Top2a,Ttk,Xrcc5,Gtf2h2,Zw10,Gnl3,Akap8l,Paxip1,Mad2l1,Piwil2,Nek6,Ndc80,Fbxo5,Paxbp1,Cdca5,Sgo2a,Trip13,Tnks2,Jdp2,Nat10,Kdm1a,Spty2d1,Pif1,Tent4b,Tada2a,Cenpe,Ccnb1,Ddx11
10_Summary	GO Biological Processes	GO:0008285	negative regulation of cell proliferation	-17.9484	136/679	Aif1,Apod,Apoe,Nr2f2,Arg1,Arg2,Bcl2,Prdm1,Btg1,Btg2,Btg3,Ddr1,Cav1,Runx3,Ctla4,Cd80,Cd86,Cd9,Cdh1,Cdk6,Cdkn1a,Cdkn2b,Cebpb,Ccr5,Ctsl,Cxadr,Dab2,Fbln1,Flt3,Fosl1,Fth1,Fzd5,Gas1,Gata3,B4galt1,Gja1,Pdpn,Gpc3,Adgrg1,P3h3,H2-Aa,H2-Ab1,Hes1,Hras,Ifng,Igf1,Il10,Il12b,Il1a,Il1b,Il2ra,Il6,Inhba,Jak2,Jun,Klf9,Lif,Lmna,Il1rl1,Smad6,Cd200,Cited2,Msx1,Myc,Neurl1a,Nup62,Per2,Pim2,Pmp22,Med1,Pparg,Prnp,Ptgds,Pt…
10_Member	GO Biological Processes	GO:0008285	negative regulation of cell proliferation	-17.9484	136/679	Aif1,Apod,Apoe,Nr2f2,Arg1,Arg2,Bcl2,Prdm1,Btg1,Btg2,Btg3,Ddr1,Cav1,Runx3,Ctla4,Cd80,Cd86,Cd9,Cdh1,Cdk6,Cdkn1a,Cdkn2b,Cebpb,Ccr5,Ctsl,Cxadr,Dab2,Fbln1,Flt3,Fosl1,Fth1,Fzd5,Gas1,Gata3,B4galt1,Gja1,Pdpn,Gpc3,Adgrg1,P3h3,H2-Aa,H2-Ab1,Hes1,Hras,Ifng,Igf1,Il10,Il12b,Il1a,Il1b,Il2ra,Il6,Inhba,Jak2,Jun,Klf9,Lif,Lmna,Il1rl1,Smad6,Cd200,Cited2,Msx1,Myc,Neurl1a,Nup62,Per2,Pim2,Pmp22,Med1,Pparg,Prnp,Ptgds,Pt…
10_Member	GO Biological Processes	GO:0050680	negative regulation of epithelial cell proliferation	-6.47267	33/140	Apoe,Nr2f2,Cav1,Runx3,Cdh1,Cdk6,Cdkn2b,Ctsl,Dab2,Gas1,Gata3,Gja1,Gpc3,Klf9,Med1,Pparg,Ptn,Ptprk,Ptprm,Ccl12,Serpinf1,Sox9,Sparc,Tgfb2,Thbs1,Tnf,Vdr,Dll4,Sav1,Rgcc,Maged1,Cd109,Nlrc3
11_Summary	GO Biological Processes	GO:0000165	MAPK cascade	-17.2764	150/795	Adam8,Adam9,Akt1,Apoe,Atf3,Axin1,Zfp36l1,C5ar1,Cav1,Cd36,Cd81,Chil1,Ccr1,Ccr7,Ackr3,Dab2,Dok2,Dusp2,Dvl3,Ednra,Epha2,Ezh2,Ptk2,Fbln1,Fgf1,Fgf13,Fgfr1,Ccn2,Foxm1,Flt3,Fzd5,Gab1,Gas6,Lpar1,Grb2,Hras,Dnaja1,Htr2b,Igf1,Ccn1,Igfbp4,Cd74,Il1a,Il1b,Il1rn,Il6,Inhba,Jak2,Jun,Kdr,Kit,Kl,Kras,Lif,Lmnb1,Kitl,Mt3,Myc,Gadd45b,Dusp8,Nup62,Osm,Pde8a,Pdgfa,Pdgfb,Med1,Ptger4,Dusp1,Rasgrp1,Rock2,Ryk,Ccl12,Ccl17,Ccl…
11_Member	GO Biological Processes	GO:0000165	MAPK cascade	-17.2764	150/795	Adam8,Adam9,Akt1,Apoe,Atf3,Axin1,Zfp36l1,C5ar1,Cav1,Cd36,Cd81,Chil1,Ccr1,Ccr7,Ackr3,Dab2,Dok2,Dusp2,Dvl3,Ednra,Epha2,Ezh2,Ptk2,Fbln1,Fgf1,Fgf13,Fgfr1,Ccn2,Foxm1,Flt3,Fzd5,Gab1,Gas6,Lpar1,Grb2,Hras,Dnaja1,Htr2b,Igf1,Ccn1,Igfbp4,Cd74,Il1a,Il1b,Il1rn,Il6,Inhba,Jak2,Jun,Kdr,Kit,Kl,Kras,Lif,Lmnb1,Kitl,Mt3,Myc,Gadd45b,Dusp8,Nup62,Osm,Pde8a,Pdgfa,Pdgfb,Med1,Ptger4,Dusp1,Rasgrp1,Rock2,Ryk,Ccl12,Ccl17,Ccl…
11_Member	GO Biological Processes	GO:0043408	regulation of MAPK cascade	-17.1261	142/738	Adam8,Adam9,Akt1,Apoe,Atf3,Axin1,C5ar1,Cav1,Cd36,Cd81,Chil1,Ccr1,Ccr7,Ackr3,Dab2,Dok2,Dusp2,Dvl3,Ednra,Epha2,Ezh2,Fbln1,Fgf1,Fgfr1,Ccn2,Foxm1,Flt3,Fzd5,Gab1,Gas6,Lpar1,Grb2,Hras,Dnaja1,Htr2b,Igf1,Ccn1,Igfbp4,Cd74,Il1a,Il1b,Il1rn,Il6,Inhba,Jak2,Jun,Kdr,Kit,Kl,Kras,Lif,Lmnb1,Kitl,Mt3,Gadd45b,Dusp8,Nup62,Osm,Pde8a,Pdgfa,Pdgfb,Dusp1,Rasgrp1,Rock2,Ryk,Ccl12,Ccl17,Ccl2,Ccl22,Ccl3,Ccl4,Ccl5,Ccl7,Ccl8,Cx…
11_Member	GO Biological Processes	GO:0070371	ERK1 and ERK2 cascade	-14.2493	77/326	Apoe,Atf3,Zfp36l1,C5ar1,Cav1,Cd36,Chil1,Ccr1,Ackr3,Dab2,Ednra,Epha2,Fbln1,Ccn2,Flt3,Gas6,Hras,Htr2b,Igf1,Ccn1,Cd74,Il1a,Il1b,Il6,Jun,Kdr,Kit,Lif,Mt3,Myc,Pde8a,Pdgfa,Pdgfb,Med1,Ptger4,Dusp1,Rasgrp1,Ccl12,Ccl17,Ccl2,Ccl22,Ccl3,Ccl4,Ccl5,Ccl7,Ccl8,Cx3cl1,Sox9,Timp3,Tnfrsf11a,Vegfb,Spry1,Spry2,Tlr2,Prmt5,Ndrg2,Mfhas1,Ramp3,Ccl24,Clcf1,Camk2n1,Dusp3,Errfi1,Rapgef2,Trem2,Gpnmb,Ffar4,Cavin3,Npnt,Spred1,…
11_Member	GO Biological Processes	GO:0043410	positive regulation of MAPK cascade	-13.4729	103/518	Adam8,Adam9,Apoe,Axin1,C5ar1,Cd36,Cd81,Chil1,Ccr1,Ccr7,Ackr3,Dab2,Dvl3,Ednra,Ezh2,Fgf1,Fgfr1,Ccn2,Flt3,Fzd5,Gab1,Gas6,Lpar1,Hras,Htr2b,Igf1,Igfbp4,Cd74,Il1a,Il1b,Il1rn,Il6,Jak2,Jun,Kdr,Kit,Kl,Kras,Lif,Lmnb1,Kitl,Mt3,Gadd45b,Osm,Pde8a,Pdgfa,Pdgfb,Rasgrp1,Rock2,Ryk,Ccl12,Ccl17,Ccl2,Ccl22,Ccl3,Ccl4,Ccl5,Ccl7,Ccl8,Cx3cl1,Sema4c,Sorbs3,Tgfa,Tgfb2,Tgfb3,Thbs1,Timp2,Tnf,Tnfrsf11a,Cd27,Traf4,Vegfb,Gadd45…
11_Member	GO Biological Processes	GO:0070372	regulation of ERK1 and ERK2 cascade	-12.5574	71/309	Apoe,Atf3,C5ar1,Cav1,Cd36,Chil1,Ccr1,Ackr3,Dab2,Ednra,Epha2,Fbln1,Ccn2,Flt3,Gas6,Hras,Htr2b,Igf1,Ccn1,Cd74,Il1a,Il1b,Il6,Jun,Kdr,Kit,Lif,Mt3,Pde8a,Pdgfa,Pdgfb,Dusp1,Rasgrp1,Ccl12,Ccl17,Ccl2,Ccl22,Ccl3,Ccl4,Ccl5,Ccl7,Ccl8,Cx3cl1,Timp3,Tnfrsf11a,Vegfb,Spry1,Spry2,Tlr2,Prmt5,Ndrg2,Mfhas1,Ramp3,Ccl24,Clcf1,Camk2n1,Dusp3,Errfi1,Rapgef2,Trem2,Gpnmb,Ffar4,Cavin3,Npnt,Spred1,Havcr2,Dnajc27,Ankrd26,C5ar2,…
11_Member	GO Biological Processes	GO:0070374	positive regulation of ERK1 and ERK2 cascade	-9.35359	51/220	Apoe,C5ar1,Cd36,Chil1,Ccr1,Ackr3,Ednra,Ccn2,Flt3,Gas6,Hras,Htr2b,Cd74,Il1a,Il1b,Il6,Jun,Kdr,Kit,Mt3,Pde8a,Pdgfa,Pdgfb,Rasgrp1,Ccl12,Ccl17,Ccl2,Ccl22,Ccl3,Ccl4,Ccl5,Ccl7,Ccl8,Cx3cl1,Tnfrsf11a,Vegfb,Spry2,Tlr2,Mfhas1,Ramp3,Ccl24,Rapgef2,Trem2,Gpnmb,Ffar4,Cavin3,Npnt,Havcr2,Dnajc27,C5ar2,Scimp
12_Summary	GO Biological Processes	GO:0010942	positive regulation of cell death	-16.1527	132/682	Adam8,Akt1,Apbb2,Atf3,Bik,Btg1,Bub1,C1qa,Cav1,Runx3,Ctla4,Cd36,Cdkn1a,Ccr5,Col18a1,Dapk3,Ddit3,Dnmt3a,Ect2,Egr1,F3,Faf1,Fasl,Ccn2,Fos,Fosl1,Fyn,G0s2,B4galt1,Lpar1,Hdac6,Hif1a,Nr4a1,Prmt2,Dnaja1,Id3,Ifng,Igf2r,Ccn1,Il10,Il12b,Il1b,Il6,Inhba,Itga6,Jak2,Jun,Kcnma1,Lck,Mcl1,Mmp2,Msx1,Mt3,Mybl2,Myc,Gadd45b,Neurl1a,Nr4a3,Nsmaf,Osm,Pdcd1,Pea15a,Plaur,Plcg1,Pparg,Ppp2ca,Prnp,Ptgs2,Ptn,Dusp1,Aldh1a2,Rapsn…
12_Member	GO Biological Processes	GO:0010942	positive regulation of cell death	-16.1527	132/682	Adam8,Akt1,Apbb2,Atf3,Bik,Btg1,Bub1,C1qa,Cav1,Runx3,Ctla4,Cd36,Cdkn1a,Ccr5,Col18a1,Dapk3,Ddit3,Dnmt3a,Ect2,Egr1,F3,Faf1,Fasl,Ccn2,Fos,Fosl1,Fyn,G0s2,B4galt1,Lpar1,Hdac6,Hif1a,Nr4a1,Prmt2,Dnaja1,Id3,Ifng,Igf2r,Ccn1,Il10,Il12b,Il1b,Il6,Inhba,Itga6,Jak2,Jun,Kcnma1,Lck,Mcl1,Mmp2,Msx1,Mt3,Mybl2,Myc,Gadd45b,Neurl1a,Nr4a3,Nsmaf,Osm,Pdcd1,Pea15a,Plaur,Plcg1,Pparg,Ppp2ca,Prnp,Ptgs2,Ptn,Dusp1,Aldh1a2,Rapsn…
12_Member	GO Biological Processes	GO:0043068	positive regulation of programmed cell death	-14.8976	121/624	Adam8,Akt1,Apbb2,Atf3,Bik,Btg1,Bub1,Cav1,Runx3,Ctla4,Cdkn1a,Ccr5,Col18a1,Dapk3,Ddit3,Ect2,Egr1,F3,Faf1,Fasl,Ccn2,Fosl1,G0s2,B4galt1,Lpar1,Hdac6,Hif1a,Nr4a1,Prmt2,Dnaja1,Id3,Ifng,Igf2r,Ccn1,Il10,Il12b,Il1b,Il6,Inhba,Itga6,Jak2,Jun,Kcnma1,Lck,Mcl1,Mmp2,Msx1,Mybl2,Myc,Gadd45b,Neurl1a,Nr4a3,Nsmaf,Osm,Pdcd1,Pea15a,Plaur,Plcg1,Pparg,Ppp2ca,Prnp,Ptgs2,Ptn,Dusp1,Aldh1a2,Rapsn,Rps6ka2,S100a8,S100a9,Scin,C…
12_Member	GO Biological Processes	GO:0043065	positive regulation of apoptotic process	-14.3745	119/619	Adam8,Akt1,Apbb2,Atf3,Bik,Btg1,Bub1,Cav1,Runx3,Ctla4,Ccr5,Col18a1,Dapk3,Ddit3,Ect2,Egr1,F3,Faf1,Fasl,Ccn2,Fosl1,G0s2,B4galt1,Lpar1,Hif1a,Nr4a1,Prmt2,Dnaja1,Id3,Ifng,Igf2r,Ccn1,Il10,Il12b,Il1b,Il6,Inhba,Itga6,Jak2,Jun,Kcnma1,Lck,Mcl1,Mmp2,Msx1,Mybl2,Myc,Gadd45b,Neurl1a,Nr4a3,Nsmaf,Osm,Pdcd1,Pea15a,Plaur,Plcg1,Pparg,Ppp2ca,Prnp,Ptgs2,Ptn,Dusp1,Aldh1a2,Rapsn,Rps6ka2,S100a8,S100a9,Scin,Ccl12,Ccl3,Ccl…
12_Member	GO Biological Processes	GO:2001235	positive regulation of apoptotic signaling pathway	-3.6239	32/181	Atf3,Bik,Bub1,Cav1,Runx3,Dapk3,Faf1,G0s2,Inhba,Jak2,Lck,Mcl1,Msx1,Myc,Osm,Pea15a,Plaur,S100a8,S100a9,Skil,Tgfb2,Thbs1,Timp3,Plscr1,Tnfrsf12a,Hip1r,Pdcd7,Gsk3b,Pmaip1,Wdr35,Maged1,Chchd10
13_Summary	GO Biological Processes	GO:0045859	regulation of protein kinase activity	-15.5834	128/663	Adam8,Adam9,Akt1,Apoe,Nr2f2,Axin1,C5ar1,Cab39,Cav1,Ccna2,Ccnb2,Ccnd1,Ccnd2,Ccne1,Ccnf,Cd81,Cdkn1a,Cdkn2b,Chil1,Ccr7,Csf1,Dab2,Dusp2,Dvl3,Ect2,Egr1,Ezh2,Ptk2,Fgf1,Fgfr1,Fzd5,Gab1,Gas6,Gnaq,Lpar1,Hras,Dnaja1,Htr2b,Ifng,Igf1,Ccn1,Cd74,Il12b,Il1b,Il1rn,Il6,Jak2,Kit,Kras,Lat,Lrp8,Ltf,Kitl,Gadd45b,Nab2,Neurl1a,Dusp8,Nup62,Pdgfa,Pdgfb,Pim1,Plk1,Pmp22,Ppp2ca,Prkar1b,Prnp,Dusp1,Rasgrp1,Stil,Slk,Sdc4,Tesk1…
13_Member	GO Biological Processes	GO:0045859	regulation of protein kinase activity	-15.5834	128/663	Adam8,Adam9,Akt1,Apoe,Nr2f2,Axin1,C5ar1,Cab39,Cav1,Ccna2,Ccnb2,Ccnd1,Ccnd2,Ccne1,Ccnf,Cd81,Cdkn1a,Cdkn2b,Chil1,Ccr7,Csf1,Dab2,Dusp2,Dvl3,Ect2,Egr1,Ezh2,Ptk2,Fgf1,Fgfr1,Fzd5,Gab1,Gas6,Gnaq,Lpar1,Hras,Dnaja1,Htr2b,Ifng,Igf1,Ccn1,Cd74,Il12b,Il1b,Il1rn,Il6,Jak2,Kit,Kras,Lat,Lrp8,Ltf,Kitl,Gadd45b,Nab2,Neurl1a,Dusp8,Nup62,Pdgfa,Pdgfb,Pim1,Plk1,Pmp22,Ppp2ca,Prkar1b,Prnp,Dusp1,Rasgrp1,Stil,Slk,Sdc4,Tesk1…
13_Member	GO Biological Processes	GO:0043549	regulation of kinase activity	-14.2024	133/728	Adam8,Adam9,Akt1,Apoe,Nr2f2,Axin1,C5ar1,Cab39,Cav1,Ccna2,Ccnb2,Ccnd1,Ccnd2,Ccne1,Ccnf,Cd81,Cdkn1a,Cdkn2b,Chil1,Ccr7,Csf1,Dab2,Dusp2,Dvl3,Ect2,Egr1,Ezh2,Ptk2,Fgf1,Fgfr1,Fzd5,Gab1,Gas6,Gnaq,Lpar1,Hras,Dnaja1,Htr2b,Ifng,Igf1,Ccn1,Cd74,Il12b,Il1b,Il1rn,Il6,Jak2,Kit,Kras,Lat,Ldb1,Lrp8,Ltf,Kitl,Gadd45b,Nab2,Neurl1a,Dusp8,Nup62,Pdgfa,Pdgfb,Pim1,Plk1,Pmp22,Ppp2ca,Prkar1b,Prnp,Dusp1,Rac1,Rasgrp1,Stil,Slk,…
13_Member	GO Biological Processes	GO:0071900	regulation of protein serine/threonine kinase activity	-13.3627	90/427	Adam8,Adam9,Akt1,Apoe,Nr2f2,Axin1,Cab39,Cav1,Ccna2,Ccnb2,Ccnd1,Ccnd2,Ccne1,Ccnf,Cd81,Cdkn1a,Cdkn2b,Ccr7,Dab2,Dusp2,Dvl3,Ezh2,Fgf1,Fgfr1,Fzd5,Gab1,Lpar1,Hras,Dnaja1,Htr2b,Ifng,Igf1,Cd74,Il1b,Il1rn,Jak2,Kit,Kras,Ltf,Kitl,Gadd45b,Dusp8,Nup62,Pdgfa,Pdgfb,Pim1,Plk1,Pmp22,Ppp2ca,Prkar1b,Dusp1,Rasgrp1,Stil,Tesk1,Tgfa,Tgfb3,Thbs1,Tnf,Tnfaip3,Tnfrsf11a,Gadd45g,Gdf15,Spry1,Spry2,Map3k1,Slc27a1,Mapk8ip3,Cam…
13_Member	GO Biological Processes	GO:0051347	positive regulation of transferase activity	-11.4487	102/549	Adam8,Adam9,Akt1,Hnrnpd,Axin1,Cab39,Ccnd1,Ccnd2,Cd81,Cdkn1a,Chil1,Ccr7,Csf1,Dab2,Dvl3,Ect2,Egr1,Ezh2,Ptk2,Fgf1,Fgfr1,Fzd5,Gab1,Gas6,Lpar1,Hmgn1,Hras,Htr2b,Ifng,Igf1,Ccn1,Cd74,Il12b,Il1b,Il1rn,Jak2,Kit,Kras,Lat,Lrp8,Ltf,Kitl,Cd200,Myc,Gadd45b,Nab2,Nek2,Neurl1a,Pdgfa,Pdgfb,Pim1,Prkcq,Plk1,Ppp2ca,Prnp,Rac1,Rasgrp1,Stil,Slk,Sdc4,Tgfa,Tgfb2,Tgfb3,Thbs1,Tnf,Tnfrsf11a,Traf4,Vav2,Xrcc5,Gadd45g,Gdf15,Map3…
13_Member	GO Biological Processes	GO:0045860	positive regulation of protein kinase activity	-11.3834	87/439	Adam8,Adam9,Akt1,Axin1,Cab39,Ccnd1,Ccnd2,Cd81,Cdkn1a,Chil1,Ccr7,Csf1,Dab2,Dvl3,Ect2,Egr1,Ezh2,Ptk2,Fgf1,Fgfr1,Fzd5,Gab1,Gas6,Lpar1,Hras,Htr2b,Ifng,Igf1,Ccn1,Cd74,Il12b,Il1b,Il1rn,Jak2,Kit,Kras,Lat,Lrp8,Ltf,Kitl,Gadd45b,Nab2,Neurl1a,Pdgfa,Pdgfb,Pim1,Ppp2ca,Prnp,Rasgrp1,Stil,Slk,Sdc4,Tgfa,Tgfb2,Tgfb3,Thbs1,Tnf,Tnfrsf11a,Traf4,Xrcc5,Gadd45g,Gdf15,Map3k1,Map3k3,Slc27a1,Mapk8ip3,Camk1,Dlg3,Stk39,Camkk…
13_Member	GO Biological Processes	GO:0033674	positive regulation of kinase activity	-10.5385	90/477	Adam8,Adam9,Akt1,Axin1,Cab39,Ccnd1,Ccnd2,Cd81,Cdkn1a,Chil1,Ccr7,Csf1,Dab2,Dvl3,Ect2,Egr1,Ezh2,Ptk2,Fgf1,Fgfr1,Fzd5,Gab1,Gas6,Lpar1,Hras,Htr2b,Ifng,Igf1,Ccn1,Cd74,Il12b,Il1b,Il1rn,Jak2,Kit,Kras,Lat,Lrp8,Ltf,Kitl,Gadd45b,Nab2,Neurl1a,Pdgfa,Pdgfb,Pim1,Ppp2ca,Prnp,Rac1,Rasgrp1,Stil,Slk,Sdc4,Tgfa,Tgfb2,Tgfb3,Thbs1,Tnf,Tnfrsf11a,Traf4,Vav2,Xrcc5,Gadd45g,Gdf15,Map3k1,Map3k3,Slc27a1,Mapk8ip3,Camk1,Dlg3,S…
13_Member	GO Biological Processes	GO:0043405	regulation of MAP kinase activity	-8.43583	60/296	Adam8,Adam9,Apoe,Axin1,Cav1,Cd81,Ccr7,Dab2,Dusp2,Dvl3,Ezh2,Fgf1,Fgfr1,Fzd5,Gab1,Lpar1,Hras,Dnaja1,Htr2b,Igf1,Cd74,Il1b,Il1rn,Jak2,Kit,Kras,Kitl,Gadd45b,Dusp8,Nup62,Pdgfa,Pdgfb,Dusp1,Rasgrp1,Tgfa,Tgfb3,Thbs1,Tnf,Tnfrsf11a,Gadd45g,Gdf15,Spry1,Spry2,Map3k1,Mapk8ip3,Stk39,Gsk3b,Lpar3,Avpi1,Spag9,Dusp3,Dtnbp1,Maged1,Spred1,Cspg4,Trib1,Dusp5,Lax1,Dusp4,Iqgap3
13_Member	GO Biological Processes	GO:0071902	positive regulation of protein serine/threonine kinase activity	-7.70394	56/280	Adam8,Adam9,Akt1,Axin1,Cab39,Ccnd1,Ccnd2,Cd81,Ccr7,Dab2,Dvl3,Ezh2,Fgf1,Fgfr1,Fzd5,Gab1,Lpar1,Hras,Htr2b,Ifng,Igf1,Cd74,Il1b,Il1rn,Jak2,Kit,Kras,Ltf,Kitl,Gadd45b,Pdgfa,Pdgfb,Pim1,Ppp2ca,Rasgrp1,Stil,Tgfa,Tgfb3,Thbs1,Tnf,Tnfrsf11a,Gadd45g,Gdf15,Map3k1,Slc27a1,Mapk8ip3,Camk1,Stk39,Lpar3,Rgcc,Avpi1,Spag9,Rapgef2,Maged1,Cspg4,Iqgap3
13_Member	GO Biological Processes	GO:0043406	positive regulation of MAP kinase activity	-5.68711	43/222	Adam8,Adam9,Axin1,Cd81,Ccr7,Dab2,Dvl3,Ezh2,Fgf1,Fgfr1,Fzd5,Gab1,Lpar1,Hras,Htr2b,Igf1,Cd74,Il1b,Il1rn,Jak2,Kit,Kras,Kitl,Gadd45b,Pdgfa,Pdgfb,Rasgrp1,Tgfa,Tgfb3,Thbs1,Tnf,Tnfrsf11a,Gadd45g,Gdf15,Map3k1,Mapk8ip3,Stk39,Lpar3,Avpi1,Spag9,Maged1,Cspg4,Iqgap3
13_Member	GO Biological Processes	GO:0080135	regulation of cellular response to stress	-5.2939	95/655	Akt1,Arg2,Axin1,Bmpr1a,Cd34,Cd36,Cdk6,Chek1,Ccr7,Ackr3,Dab2,Dvl3,Eya1,Eya2,Eya4,Ccn2,Foxm1,Fyn,Fzd5,Gab1,Hdac6,Hic1,Hif1a,Hras,Dnaja1,Ier3,Cd74,Il10,Il1a,Il1b,Il1rn,Impact,Kras,Lmnb1,Mcl1,Mdm2,Myc,Ppp1r15a,Gadd45b,Nr4a3,Pde8a,Ptgs2,Dusp1,Ptprs,Rad51,Rad51ap1,Rasgrp1,Rock2,Sema4c,Skil,Snai1,Plk2,Tgfb2,Tnf,Tnfrsf11a,Cd27,Traf4,Plscr1,Gadd45g,Map3k1,Map3k3,Map3k7,Creb3l1,Slc7a11,Eif2ak4,Trp53bp1,Usp…
13_Member	GO Biological Processes	GO:0032147	activation of protein kinase activity	-5.08717	45/249	Adam9,Axin1,Cab39,Cd81,Chil1,Ccr7,Dab2,Ect2,Fgf1,Gab1,Gas6,Lpar1,Igf1,Cd74,Il12b,Il1b,Jak2,Kit,Gadd45b,Pdgfb,Prnp,Slk,Tgfa,Tgfb2,Tgfb3,Thbs1,Tnf,Traf4,Gadd45g,Gdf15,Map3k1,Map3k3,Mapk8ip3,Stk39,Camkk1,Nek6,Lpar3,Avpi1,Spag9,Tpx2,Irak2,Cspg4,Map4k3,Sbk2,Iqgap3
13_Member	GO Biological Processes	GO:0031098	stress-activated protein kinase signaling cascade	-4.50125	49/294	Akt1,Axin1,Zfp36l1,Ccr7,Dab2,Dvl3,Ptk2,Ccn2,Foxm1,Fzd5,Gab1,Hras,Dnaja1,Il1a,Il1b,Il1rn,Lmnb1,Gadd45b,Ptger4,Dusp1,Rasgrp1,Sema4c,Slk,Tgfb2,Tnf,Tnfrsf11a,Cd27,Traf4,Gadd45g,Map3k1,Map3k3,Map3k7,Mapk8ip3,Pbk,Mfhas1,Stk39,Foxo1,Dact1,Nek6,Spag9,Dusp3,Errfi1,Rap2a,Dtnbp1,Ankrd6,Tlr3,Trib1,Map4k3,Sbk2
13_Member	GO Biological Processes	GO:0051403	stress-activated MAPK cascade	-3.91255	43/261	Akt1,Axin1,Zfp36l1,Ccr7,Dab2,Dvl3,Ptk2,Ccn2,Foxm1,Fzd5,Gab1,Hras,Dnaja1,Il1a,Il1b,Il1rn,Lmnb1,Gadd45b,Ptger4,Dusp1,Rasgrp1,Sema4c,Tgfb2,Tnf,Tnfrsf11a,Cd27,Traf4,Gadd45g,Map3k1,Map3k3,Map3k7,Mapk8ip3,Pbk,Mfhas1,Foxo1,Dact1,Spag9,Dusp3,Rap2a,Dtnbp1,Ankrd6,Tlr3,Trib1
13_Member	GO Biological Processes	GO:0032872	regulation of stress-activated MAPK cascade	-3.67439	39/235	Akt1,Axin1,Ccr7,Dab2,Dvl3,Ccn2,Foxm1,Fzd5,Gab1,Hras,Dnaja1,Il1a,Il1b,Il1rn,Lmnb1,Gadd45b,Dusp1,Rasgrp1,Sema4c,Tgfb2,Tnf,Tnfrsf11a,Cd27,Traf4,Gadd45g,Map3k1,Map3k3,Map3k7,Mapk8ip3,Pbk,Mfhas1,Foxo1,Dact1,Spag9,Dusp3,Rap2a,Dtnbp1,Ankrd6,Tlr3
13_Member	GO Biological Processes	GO:0007254	JNK cascade	-3.60039	35/205	Akt1,Axin1,Ccr7,Dab2,Dvl3,Ptk2,Ccn2,Fzd5,Gab1,Hras,Dnaja1,Il1a,Il1b,Il1rn,Lmnb1,Gadd45b,Ptger4,Rasgrp1,Tnf,Tnfrsf11a,Cd27,Traf4,Gadd45g,Map3k1,Map3k7,Mapk8ip3,Mfhas1,Dact1,Spag9,Dusp3,Rap2a,Dtnbp1,Ankrd6,Tlr3,Trib1
13_Member	GO Biological Processes	GO:0070302	regulation of stress-activated protein kinase signaling cascade	-3.59684	39/237	Akt1,Axin1,Ccr7,Dab2,Dvl3,Ccn2,Foxm1,Fzd5,Gab1,Hras,Dnaja1,Il1a,Il1b,Il1rn,Lmnb1,Gadd45b,Dusp1,Rasgrp1,Sema4c,Tgfb2,Tnf,Tnfrsf11a,Cd27,Traf4,Gadd45g,Map3k1,Map3k3,Map3k7,Mapk8ip3,Pbk,Mfhas1,Foxo1,Dact1,Spag9,Dusp3,Rap2a,Dtnbp1,Ankrd6,Tlr3
13_Member	GO Biological Processes	GO:0000187	activation of MAPK activity	-3.43457	23/117	Cd81,Ccr7,Dab2,Fgf1,Gab1,Lpar1,Igf1,Cd74,Il1b,Kit,Tgfa,Tgfb3,Thbs1,Tnf,Gdf15,Map3k1,Mapk8ip3,Stk39,Lpar3,Avpi1,Spag9,Cspg4,Iqgap3
13_Member	GO Biological Processes	GO:0046328	regulation of JNK cascade	-3.23907	32/190	Akt1,Axin1,Ccr7,Dab2,Dvl3,Ccn2,Fzd5,Gab1,Hras,Dnaja1,Il1a,Il1b,Il1rn,Lmnb1,Gadd45b,Rasgrp1,Tnf,Tnfrsf11a,Cd27,Traf4,Gadd45g,Map3k1,Map3k7,Mapk8ip3,Mfhas1,Dact1,Spag9,Dusp3,Rap2a,Dtnbp1,Ankrd6,Tlr3
13_Member	GO Biological Processes	GO:0046330	positive regulation of JNK cascade	-3.15387	26/145	Axin1,Ccr7,Dab2,Dvl3,Ccn2,Fzd5,Gab1,Hras,Il1a,Il1b,Il1rn,Lmnb1,Gadd45b,Rasgrp1,Tnf,Tnfrsf11a,Cd27,Traf4,Gadd45g,Map3k1,Map3k7,Mapk8ip3,Mfhas1,Spag9,Ankrd6,Tlr3
13_Member	GO Biological Processes	GO:0032874	positive regulation of stress-activated MAPK cascade	-2.99995	29/172	Axin1,Ccr7,Dab2,Dvl3,Ccn2,Fzd5,Gab1,Hras,Il1a,Il1b,Il1rn,Lmnb1,Gadd45b,Rasgrp1,Sema4c,Tgfb2,Tnf,Tnfrsf11a,Cd27,Traf4,Gadd45g,Map3k1,Map3k3,Map3k7,Mapk8ip3,Mfhas1,Spag9,Ankrd6,Tlr3
13_Member	GO Biological Processes	GO:0070304	positive regulation of stress-activated protein kinase signaling cascade	-2.95931	29/173	Axin1,Ccr7,Dab2,Dvl3,Ccn2,Fzd5,Gab1,Hras,Il1a,Il1b,Il1rn,Lmnb1,Gadd45b,Rasgrp1,Sema4c,Tgfb2,Tnf,Tnfrsf11a,Cd27,Traf4,Gadd45g,Map3k1,Map3k3,Map3k7,Mapk8ip3,Mfhas1,Spag9,Ankrd6,Tlr3
14_Summary	Reactome Gene Sets	R-MMU-109582	Hemostasis	-15.5021	113/555	Actn2,Angpt2,Akt1,Atp1b1,Atp2a2,Atp2b2,Cav1,Cbx5,Cd36,Cd63,Cd9,Bcar1,Ctsw,Dok2,Ehd1,F3,F7,Ptk2,Fyn,Gas6,Gata3,Gna12,Gna14,Gna15,Gnaq,Gnb1,Gnb4,Pdpn,Gpc1,Grb2,Hras,Igf1,Cd74,Itga6,Itgax,Itpr3,Jak2,F11r,Kif11,Kif1a,Kif4,Kras,Lat,Lck,Lrp8,Epcam,Maff,Mafk,Mag,Slc3a2,Mertk,Orm1,Pde3b,Pdgfa,Pdgfb,Pecam1,Prkaca,Prkcb,Prkcq,Serpine1,Serpinb2,Plau,Plaur,Plcg1,Ppp2ca,Prkar1b,Procr,Kif20a,Rac1,Rasgrp1,Slc16…
14_Member	Reactome Gene Sets	R-MMU-109582	Hemostasis	-15.5021	113/555	Actn2,Angpt2,Akt1,Atp1b1,Atp2a2,Atp2b2,Cav1,Cbx5,Cd36,Cd63,Cd9,Bcar1,Ctsw,Dok2,Ehd1,F3,F7,Ptk2,Fyn,Gas6,Gata3,Gna12,Gna14,Gna15,Gnaq,Gnb1,Gnb4,Pdpn,Gpc1,Grb2,Hras,Igf1,Cd74,Itga6,Itgax,Itpr3,Jak2,F11r,Kif11,Kif1a,Kif4,Kras,Lat,Lck,Lrp8,Epcam,Maff,Mafk,Mag,Slc3a2,Mertk,Orm1,Pde3b,Pdgfa,Pdgfb,Pecam1,Prkaca,Prkcb,Prkcq,Serpine1,Serpinb2,Plau,Plaur,Plcg1,Ppp2ca,Prkar1b,Procr,Kif20a,Rac1,Rasgrp1,Slc16…
14_Member	Reactome Gene Sets	R-MMU-202733	Cell surface interactions at the vascular wall	-8.73247	33/115	Angpt2,Atp1b1,Cav1,Dok2,Fyn,Gas6,Gpc1,Grb2,Hras,Cd74,Itga6,Itgax,F11r,Kras,Lck,Epcam,Mag,Slc3a2,Mertk,Pecam1,Plcg1,Procr,Slc16a1,Sdc1,Sdc3,Sdc4,Yes1,Slc7a11,Slc7a8,Trem1,Jam2,Jam3,Olr1
15_Summary	GO Biological Processes	GO:0050678	regulation of epithelial cell proliferation	-15.1913	83/353	Akt1,Birc5,Apoe,Nr2f2,Arg1,Bmpr1a,Zfp36l1,C5ar1,Cav1,Runx3,Ccnd1,Ccnd2,Cdh1,Cdk6,Cdkn2b,Ctsl,Cxadr,Dab2,Ednra,Ednrb,Eya1,F3,Fgf1,Fgfr1,Fzd7,Gas1,Gata3,B4galt1,Gja1,Gpc3,Hes1,Hmgn1,Nr4a1,Hras,Htr2b,Ifng,Igf1,Il10,Il6,Jun,Kdr,Klf9,Mmp12,Myc,Nr4a3,Uhrf1,Pdgfb,Plau,Plcg1,Med1,Pparg,Ptn,Ptprk,Ptprm,Aldh1a2,Ccl12,Ccl2,Ccl5,Serpinf1,Sox9,Sparc,Tcf7l2,Tgfa,Tgfb2,Thbs1,Tnf,Tnfaip3,Vdr,Vegfb,Dll4,Htra1,Ccl…
15_Member	GO Biological Processes	GO:0050678	regulation of epithelial cell proliferation	-15.1913	83/353	Akt1,Birc5,Apoe,Nr2f2,Arg1,Bmpr1a,Zfp36l1,C5ar1,Cav1,Runx3,Ccnd1,Ccnd2,Cdh1,Cdk6,Cdkn2b,Ctsl,Cxadr,Dab2,Ednra,Ednrb,Eya1,F3,Fgf1,Fgfr1,Fzd7,Gas1,Gata3,B4galt1,Gja1,Gpc3,Hes1,Hmgn1,Nr4a1,Hras,Htr2b,Ifng,Igf1,Il10,Il6,Jun,Kdr,Klf9,Mmp12,Myc,Nr4a3,Uhrf1,Pdgfb,Plau,Plcg1,Med1,Pparg,Ptn,Ptprk,Ptprm,Aldh1a2,Ccl12,Ccl2,Ccl5,Serpinf1,Sox9,Sparc,Tcf7l2,Tgfa,Tgfb2,Thbs1,Tnf,Tnfaip3,Vdr,Vegfb,Dll4,Htra1,Ccl…
15_Member	GO Biological Processes	GO:0050673	epithelial cell proliferation	-14.7867	92/419	Akt1,Birc5,Apoe,Nr2f2,Areg,Arg1,Bmpr1a,Zfp36l1,C5ar1,Cav1,Runx3,Ccnd1,Ccnd2,Cd34,Cdh1,Cdk6,Cdkn2b,Cebpb,Ctsl,Cxadr,Dab2,Ednra,Ednrb,Epha2,Eya1,F3,Fgf1,Fgfr1,Fzd7,Gas1,Gata3,B4galt1,Gja1,Gpc3,Hes1,Hmgn1,Nr4a1,Hras,Htr2b,Ifng,Igf1,Igfbp4,Il10,Il6,Jun,Kdr,Kit,Klf9,Mki67,Mmp12,Myc,Nr4a3,Uhrf1,Pdgfb,Plau,Plcg1,Med1,Pparg,Ptn,Ptprk,Ptprm,Aldh1a2,Ccl12,Ccl2,Ccl5,Serpinf1,Sox9,Sparc,Tcf7l2,Tgfa,Tgfb2,Thb…
15_Member	GO Biological Processes	GO:0050679	positive regulation of epithelial cell proliferation	-7.1836	43/197	Akt1,Arg1,Bmpr1a,C5ar1,Cav1,Ccnd1,Ccnd2,Cxadr,Eya1,F3,Fgf1,Fgfr1,Fzd7,Gas1,B4galt1,Nr4a1,Hras,Htr2b,Igf1,Il10,Il6,Jun,Kdr,Mmp12,Myc,Nr4a3,Pdgfb,Plcg1,Med1,Ptn,Ccl2,Ccl5,Sox9,Tcf7l2,Tgfa,Tnfaip3,Vegfb,Htra1,Ccl24,Ppp1r16b,C5ar2,Egfl7,Iqgap3
15_Member	GO Biological Processes	GO:0001936	regulation of endothelial cell proliferation	-6.3174	31/129	Akt1,Apoe,Nr2f2,Arg1,Bmpr1a,Cav1,F3,Fgfr1,Gja1,Nr4a1,Htr2b,Igf1,Il10,Jun,Kdr,Pdgfb,Plcg1,Pparg,Ptprm,Aldh1a2,Ccl12,Ccl2,Sparc,Thbs1,Tnf,Vegfb,Dll4,Ccl24,Rgcc,Ppp1r16b,Egfl7
15_Member	GO Biological Processes	GO:0001935	endothelial cell proliferation	-6.24687	33/143	Akt1,Apoe,Nr2f2,Arg1,Bmpr1a,Cav1,Cd34,Epha2,F3,Fgfr1,Gja1,Nr4a1,Htr2b,Igf1,Il10,Jun,Kdr,Pdgfb,Plcg1,Pparg,Ptprm,Aldh1a2,Ccl12,Ccl2,Sparc,Thbs1,Tnf,Vegfb,Dll4,Ccl24,Rgcc,Ppp1r16b,Egfl7
15_Member	GO Biological Processes	GO:0001938	positive regulation of endothelial cell proliferation	-2.90482	18/90	Akt1,Arg1,Cav1,F3,Fgfr1,Nr4a1,Htr2b,Igf1,Il10,Jun,Kdr,Pdgfb,Plcg1,Ccl2,Vegfb,Ccl24,Ppp1r16b,Egfl7
16_Summary	GO Biological Processes	GO:0045664	regulation of neuron differentiation	-15.1729	141/769	Adamts1,Adcy6,Avil,Akt1,Apoe,Arc,Arf6,Rnd2,Arsb,Bcl2,Cav1,Cbfa2t2,Cd38,Cit,Cxcr4,Ccr5,Cttn,Dab2,Dvl3,Ect2,Ednrb,Eef2k,Ehd1,Eomes,Ephb3,Eya1,Ezh2,Ptk2,Fgf13,Fgfr1,Ncs1,Fyn,Gata3,Gfap,Gfi1,Lpar1,Hspa5,Hap1,Hes1,Htr7,Elavl4,Id3,Ifng,Ifrd1,Il1b,Il6,Impact,Jag1,Lif,Mycl,Lrp8,Mag,Mdm2,Nbl1,Nedd4,Neurl1a,P2ry2,Plxna1,Pmp22,Med1,Ptn,Ptprs,Rac1,Ryk,S100a9,Scn1b,Ccl5,Cx3cl1,Serpinf1,Sema4c,Sgk1,Skil,Plk2,S…
16_Member	GO Biological Processes	GO:0045664	regulation of neuron differentiation	-15.1729	141/769	Adamts1,Adcy6,Avil,Akt1,Apoe,Arc,Arf6,Rnd2,Arsb,Bcl2,Cav1,Cbfa2t2,Cd38,Cit,Cxcr4,Ccr5,Cttn,Dab2,Dvl3,Ect2,Ednrb,Eef2k,Ehd1,Eomes,Ephb3,Eya1,Ezh2,Ptk2,Fgf13,Fgfr1,Ncs1,Fyn,Gata3,Gfap,Gfi1,Lpar1,Hspa5,Hap1,Hes1,Htr7,Elavl4,Id3,Ifng,Ifrd1,Il1b,Il6,Impact,Jag1,Lif,Mycl,Lrp8,Mag,Mdm2,Nbl1,Nedd4,Neurl1a,P2ry2,Plxna1,Pmp22,Med1,Ptn,Ptprs,Rac1,Ryk,S100a9,Scn1b,Ccl5,Cx3cl1,Serpinf1,Sema4c,Sgk1,Skil,Plk2,S…
16_Member	GO Biological Processes	GO:0120035	regulation of plasma membrane bounded cell projection organization	-12.7383	133/760	Adamts1,Adcy6,Avil,Akt1,Apoe,Arc,Arf6,Rnd2,Arsb,Cav1,Cbfa2t2,Cd38,Cit,Cxcr4,Ccr5,Ccr7,Cttn,Dab2,Dvl3,Eef2k,Ehd1,Epha2,Ephb3,Ezh2,Ptk2,Fscn1,Fer,Fgf13,Fgfr1,Ncs1,Fyn,Gata3,Gfap,Gfi1,Pdpn,Lpar1,Hspa5,Hap1,Hes1,Hras,Htr7,Elavl4,Ifrd1,Il6,Kit,Lif,Lrp8,Mag,Mdm2,Nedd4,Neurl1a,P2ry2,Enpp2,Prkcq,Plxna1,Pmp22,Prnp,Ptn,Ptprs,Rac1,Ryk,S100a9,Scn1b,Cx3cl1,Serpinf1,Sema4c,Sgk1,Skil,Plk2,Sphk1,Serpine2,Tgfb3,D…
16_Member	GO Biological Processes	GO:0031344	regulation of cell projection organization	-12.6883	134/769	Adamts1,Adcy6,Avil,Akt1,Apoe,Arc,Arf6,Rnd2,Arsb,Cav1,Cbfa2t2,Cd38,Cit,Cxcr4,Ccr5,Ccr7,Cttn,Dab2,Dvl3,Eef2k,Ehd1,Epha2,Ephb3,Ezh2,Ptk2,Fscn1,Fer,Fgf13,Fgfr1,Ncs1,Fyn,Gata3,Gfap,Gfi1,Pdpn,Lpar1,Hspa5,Hap1,Hes1,Hras,Htr7,Elavl4,Ifrd1,Il6,Kit,Lif,Lrp8,Mag,Mdm2,Nedd4,Neurl1a,P2ry2,Enpp2,Prkcq,Plxna1,Pmp22,Prnp,Ptn,Ptprs,Rac1,Ryk,S100a9,Scn1b,Cx3cl1,Serpinf1,Sema4c,Sgk1,Skil,Plk2,Sphk1,Serpine2,Tgfb3,D…
16_Member	GO Biological Processes	GO:0010975	regulation of neuron projection development	-11.4789	108/594	Adamts1,Adcy6,Avil,Akt1,Apoe,Arc,Arf6,Rnd2,Arsb,Cbfa2t2,Cd38,Cit,Cxcr4,Ccr5,Cttn,Dab2,Dvl3,Eef2k,Ehd1,Ephb3,Ezh2,Ptk2,Fgf13,Fgfr1,Ncs1,Fyn,Gata3,Gfap,Gfi1,Lpar1,Hspa5,Hap1,Hes1,Htr7,Elavl4,Ifrd1,Il6,Lif,Lrp8,Mag,Mdm2,Nedd4,Neurl1a,P2ry2,Plxna1,Pmp22,Ptn,Ptprs,Rac1,Ryk,S100a9,Scn1b,Cx3cl1,Serpinf1,Sema4c,Sgk1,Skil,Plk2,Sphk1,Serpine2,Dpysl3,Ywhah,Mgll,Pacsin1,Tnfrsf12a,Stau2,Ulk2,Atp8a2,Camk1,Rufy…
16_Member	GO Biological Processes	GO:0000904	cell morphogenesis involved in differentiation	-11.4393	132/783	Apbb2,Apoe,Arc,Rnd2,Atp2b2,Bcl2,Runx3,Cdh1,Cit,Cxcr4,Ccr5,Col14a1,Col18a1,Col6a3,Bcar1,Cttn,Dab2,Dst,Eef2k,Egr2,Epha2,Ephb3,Ptk2,Fbln1,Fer,Fgf13,Fyn,Fzd7,Gas1,Gata3,Pdpn,Hdac6,Hes1,Hrh2,Elavl4,Ifrd1,Stmn1,Lamb2,Lef1,Lrp8,Mag,Mfap2,Matn2,Mertk,Nedd4,Nr4a3,Notch4,Ctnnd2,Nrp2,Nr4a2,Enpp2,Pecam1,Plxna1,Pmp22,St14,Ptprm,Ptprs,Rac1,Rock2,Ryk,Scn1b,Sema4c,Sgk1,Skil,Slc1a3,Spint2,Stxbp1,Tgfb2,Ttc3,Unc5c,…
16_Member	GO Biological Processes	GO:0050769	positive regulation of neurogenesis	-10.715	103/572	Adamts1,Avil,Apoe,Rnd2,Arsb,Bcl2,C1qa,Cbfa2t2,Cxcr4,Ccr5,Csf1,Dvl3,Ect2,Eef2k,Ehd1,Ezh2,Ptk2,Fgfr1,Fyn,Gfap,Lpar1,Hspa5,Hap1,Hes1,Hif1a,Htr7,Elavl4,Ifng,Igf1,Il1b,Il6,Impact,Kdr,Kit,Lif,Lrp8,Mag,Myc,Nbl1,Neurl1a,P2ry2,Enpp2,Plxna1,Pparg,Ptn,Ptpra,Rac1,Rela,S100a9,Atxn1,Scn1b,Ccl5,Cx3cl1,Serpinf1,Sgk1,Skil,Sphk1,Serpine2,Spint1,Zeb1,Tgif1,Timp2,Tnf,Dpysl3,Xrcc5,Pacsin1,Tlr2,Tnfrsf12a,Prmt5,Stau2,B…
16_Member	GO Biological Processes	GO:0010720	positive regulation of cell development	-10.4529	112/648	Adamts1,Avil,Apoe,Rnd2,Arsb,Bcl2,C1qa,Cbfa2t2,Cxcr4,Ccr5,Csf1,Dab2,Dvl3,Ect2,Eef2k,Ehd1,Ezh2,Ptk2,Fgfr1,Fyn,Gfap,Lpar1,Hspa5,Hap1,Hes1,Hif1a,Htr7,Elavl4,Ifng,Igf1,Il1b,Il6,Impact,Kdr,Kit,Lif,Lrp8,Mag,Myc,Nbl1,Neurl1a,P2ry2,Enpp2,Abcb1a,Plxna1,Pparg,Ptn,Ptpra,Rac1,Rela,S100a9,Atxn1,Scn1b,Ccl5,Cx3cl1,Serpinf1,Sgk1,Skil,Sphk1,Serpine2,Spint1,Aurka,Zeb1,Tgif1,Timp2,Tnf,Dpysl3,Xrcc5,Pacsin1,Tlr2,Tnfrs…
16_Member	GO Biological Processes	GO:0051962	positive regulation of nervous system development	-10.4157	111/641	Adamts1,Avil,Apoe,Rnd2,Arsb,Bcl2,C1qa,Cbfa2t2,Cxcr4,Ccr5,Csf1,Dvl3,Ect2,Eef2k,Ehd1,Ephb3,Ezh2,Ptk2,Fgfr1,Fyn,Gfap,Lpar1,Hspa5,Hap1,Hes1,Hif1a,Htr7,Elavl4,Ifng,Igf1,Il1b,Il6,Impact,Kdr,Kit,Lif,Lrp8,Mag,Myc,Nbl1,Neurl1a,P2ry2,Enpp2,Plxna1,Pparg,Ptn,Ptpra,Rac1,Rela,S100a9,Atxn1,Scn1b,Ccl5,Cx3cl1,Serpinf1,Sgk1,Skil,Sphk1,Serpine2,Spint1,Zeb1,Tgif1,Thbs2,Timp2,Tnf,Dpysl3,Xrcc5,Pacsin1,Tlr2,Tnfrsf12a,P…
16_Member	GO Biological Processes	GO:0022604	regulation of cell morphogenesis	-9.84384	93/514	Apoe,Arc,Rhoc,Rnd2,Cit,Cxcr4,Ccr5,Bcar1,Cttn,Dab2,Dapk3,Dvl3,Eef2k,Epb41l2,Epb41l3,Ephb3,Ptk2,Fbln1,Fgf13,Fyn,Gna12,Pdpn,Lpar1,Hexb,Ifrd1,Il6,Kdr,Kit,Lrp8,Mag,Nedd4,Enpp2,Plxna1,Ptn,Ptprs,Rac1,Ryk,Ccl12,Ccl2,Ccl3,Sema4c,Sgk1,Skil,Sparc,Ttc3,Fmnl3,Ywhah,Mgll,Tnfrsf12a,Stau2,Ulk2,Rufy3,Golga4,Plxnc1,Olfm1,Ccl24,Dbn1,Net1,Gsk3b,Parva,Syne1,Lpar3,Bambi,Carmil1,Ttl,Bhlhb9,Fmnl2,Arhgap18,Fblim1,Rhoh,Sm…
16_Member	GO Biological Processes	GO:0120039	plasma membrane bounded cell projection morphogenesis	-8.55649	110/680	Apbb2,Apoe,Arc,Rnd2,Bcl2,Ddr1,Runx3,Cit,Cxcr4,Ccr5,Cttn,Dst,Dvl3,Eef2k,Egr2,Epb41l3,Epha2,Ephb3,Ptk2,Fgf13,Fyn,Gas1,Gata3,Gja1,Pdpn,Hdac6,Elavl4,Ifrd1,Impact,Kdr,Stmn1,Lamb2,Lrp8,Mag,Matn2,Nbl1,Nedd4,Nr4a3,Ctnnd2,Nrp2,Nr4a2,Enpp2,Plxna1,Pmp22,Ptprm,Ptprs,Rac1,Rock2,Ryk,Atxn2,Scn1b,Sema4c,Sgk1,Skil,Aurka,Stxbp1,Tgfb2,Unc5c,Wee1,Ywhah,Mgll,Pacsin1,Eif2ak4,Tnfrsf12a,Stau2,Ulk2,Mapk8ip3,Atp8a2,Rufy3,…
16_Member	GO Biological Processes	GO:0048858	cell projection morphogenesis	-8.44719	110/683	Apbb2,Apoe,Arc,Rnd2,Bcl2,Ddr1,Runx3,Cit,Cxcr4,Ccr5,Cttn,Dst,Dvl3,Eef2k,Egr2,Epb41l3,Epha2,Ephb3,Ptk2,Fgf13,Fyn,Gas1,Gata3,Gja1,Pdpn,Hdac6,Elavl4,Ifrd1,Impact,Kdr,Stmn1,Lamb2,Lrp8,Mag,Matn2,Nbl1,Nedd4,Nr4a3,Ctnnd2,Nrp2,Nr4a2,Enpp2,Plxna1,Pmp22,Ptprm,Ptprs,Rac1,Rock2,Ryk,Atxn2,Scn1b,Sema4c,Sgk1,Skil,Aurka,Stxbp1,Tgfb2,Unc5c,Wee1,Ywhah,Mgll,Pacsin1,Eif2ak4,Tnfrsf12a,Stau2,Ulk2,Mapk8ip3,Atp8a2,Rufy3,…
16_Member	GO Biological Processes	GO:0032990	cell part morphogenesis	-8.24899	112/705	Apbb2,Apoe,Arc,Rnd2,Bcl2,Ddr1,Runx3,Cit,Cxcr4,Ccr5,Cttn,Dst,Dvl3,Eef2k,Egr2,Epb41l3,Epha2,Ephb3,Ptk2,Fgf13,Fyn,Gas1,Gata3,Gja1,Pdpn,Hdac6,Elavl4,Ifrd1,Impact,Kdr,Stmn1,Lamb2,Lrp8,Mag,Matn2,Nbl1,Nedd4,Nr4a3,Ctnnd2,Nrp2,Nr4a2,Enpp2,Plxna1,Pmp22,Ptprm,Ptprs,Nectin2,Rac1,Rock2,Ryk,Atxn2,Scn1b,Sema4c,Sgk1,Skil,Aurka,Stxbp1,Tgfb2,Unc5c,Wee1,Ywhah,Mgll,Pacsin1,Eif2ak4,Tnfrsf12a,Stau2,Ulk2,Mapk8ip3,Atp8a…
16_Member	GO Biological Processes	GO:0048812	neuron projection morphogenesis	-8.17308	107/666	Apbb2,Apoe,Arc,Rnd2,Bcl2,Ddr1,Runx3,Cit,Cxcr4,Ccr5,Cttn,Dst,Dvl3,Eef2k,Egr2,Epb41l3,Epha2,Ephb3,Ptk2,Fgf13,Fyn,Gas1,Gata3,Gja1,Hdac6,Elavl4,Ifrd1,Impact,Kdr,Stmn1,Lamb2,Lrp8,Mag,Matn2,Nbl1,Nedd4,Nr4a3,Ctnnd2,Nrp2,Nr4a2,Plxna1,Pmp22,Ptprm,Ptprs,Rac1,Rock2,Ryk,Atxn2,Scn1b,Sema4c,Sgk1,Skil,Aurka,Stxbp1,Tgfb2,Unc5c,Wee1,Ywhah,Mgll,Pacsin1,Eif2ak4,Tnfrsf12a,Stau2,Ulk2,Mapk8ip3,Atp8a2,Rufy3,Golga4,Plxn…
16_Member	GO Biological Processes	GO:0048667	cell morphogenesis involved in neuron differentiation	-6.71749	96/617	Apbb2,Apoe,Arc,Rnd2,Atp2b2,Bcl2,Runx3,Cit,Cxcr4,Ccr5,Cttn,Dst,Eef2k,Egr2,Epha2,Ephb3,Ptk2,Fgf13,Fyn,Gas1,Gata3,Hdac6,Hes1,Elavl4,Ifrd1,Stmn1,Lamb2,Lrp8,Mag,Matn2,Nedd4,Nr4a3,Ctnnd2,Nrp2,Nr4a2,Plxna1,Pmp22,Ptprm,Ptprs,Rac1,Rock2,Ryk,Scn1b,Sema4c,Sgk1,Skil,Slc1a3,Stxbp1,Tgfb2,Unc5c,Ywhah,Mgll,Tnfrsf12a,Stau2,Ulk2,Mapk8ip3,Atp8a2,Bbs1,Rufy3,Golga4,Plxnc1,Olfm1,Dbn1,Gsk3b,Bcl11b,Dact1,Syne1,Lpar3,Ttl…
16_Member	GO Biological Processes	GO:0010769	regulation of cell morphogenesis involved in differentiation	-6.63701	61/338	Apoe,Arc,Rnd2,Cit,Ccr5,Bcar1,Cttn,Dab2,Eef2k,Ephb3,Ptk2,Fbln1,Fgf13,Pdpn,Ifrd1,Lrp8,Mag,Nedd4,Enpp2,Plxna1,Ptprs,Rac1,Ryk,Sema4c,Sgk1,Skil,Ttc3,Ywhah,Mgll,Tnfrsf12a,Stau2,Ulk2,Rufy3,Golga4,Plxnc1,Olfm1,Dbn1,Net1,Gsk3b,Syne1,Lpar3,Carmil1,Ttl,Bhlhb9,Rapgef2,Rap2a,Ndel1,Dtnbp1,Kank1,Baiap2,Rcc2,Rac3,Lzts1,Sema6d,Sipa1l1,Lrp4,Spg20,Akap5,Ppp1r9a,Ust,Olfm4
16_Member	GO Biological Processes	GO:0045666	positive regulation of neuron differentiation	-6.38801	75/454	Adamts1,Avil,Apoe,Rnd2,Arsb,Bcl2,Cbfa2t2,Cxcr4,Ccr5,Dvl3,Ect2,Eef2k,Ehd1,Ezh2,Fgfr1,Fyn,Lpar1,Hspa5,Hap1,Htr7,Elavl4,Ifng,Il6,Impact,Lif,Lrp8,Nbl1,Neurl1a,P2ry2,Plxna1,Ptn,Rac1,S100a9,Scn1b,Ccl5,Cx3cl1,Serpinf1,Sgk1,Skil,Sphk1,Serpine2,Zeb1,Tgif1,Timp2,Dpysl3,Pacsin1,Tnfrsf12a,Stau2,Mapk8ip3,Atp8a2,Camk1,Rufy3,Golga4,Plxnc1,Dbn1,Gsk3b,Sall1,Lpar3,D16Ertd472e,Bhlhb9,Spag9,Smurf1,Rapgef2,Ndel1,Kdm1…
16_Member	GO Biological Processes	GO:0031346	positive regulation of cell projection organization	-5.57158	73/460	Adamts1,Avil,Apoe,Rnd2,Arsb,Cbfa2t2,Cxcr4,Ccr7,Dvl3,Eef2k,Ehd1,Ezh2,Fscn1,Fgfr1,Fyn,Lpar1,Hspa5,Hap1,Hras,Htr7,Elavl4,Il6,Kit,Lif,Lrp8,Neurl1a,P2ry2,Enpp2,Prkcq,Plxna1,Ptn,Rac1,S100a9,Scn1b,Cx3cl1,Serpinf1,Sgk1,Skil,Sphk1,Serpine2,Tgfb3,Dpysl3,Pacsin1,Tnfrsf12a,Stau2,Atp8a2,Camk1,Rufy3,Golga4,Plxnc1,Dbn1,Gsk3b,Lpar3,D16Ertd472e,Carmil1,Anln,Bhlhb9,P2ry12,Smurf1,Rapgef2,Ndel1,Kdm1a,Bbs4,Rrn3,Baiap…
16_Member	GO Biological Processes	GO:0060560	developmental growth involved in morphogenesis	-5.3634	48/266	Apoe,Areg,Rnd2,Ddr1,Cxcr4,Ccr5,Csf1,Cttn,S1pr1,Fgf1,Fgf13,Hdac6,Ifrd1,Impact,Lamb2,Mag,Nrp2,Plxna1,Med1,Ptprs,Ryk,Sema4c,Slc12a2,Sox9,Aurka,Wnt11,Mgll,Spry1,Spry2,Eif2ak4,Tnfrsf12a,Ulk2,Rufy3,Golga4,Cadm1,Olfm1,Dbn1,Gsk3b,Sall1,Lpar3,Ttl,Flrt3,Smurf1,Ndel1,Kdm1a,Sema6d,Rnf157,Spg20
16_Member	GO Biological Processes	GO:0010976	positive regulation of neuron projection development	-4.60476	57/356	Adamts1,Avil,Apoe,Rnd2,Arsb,Cbfa2t2,Cxcr4,Dvl3,Eef2k,Ehd1,Ezh2,Fgfr1,Fyn,Lpar1,Hspa5,Hap1,Htr7,Elavl4,Il6,Lif,Lrp8,Neurl1a,P2ry2,Plxna1,Ptn,Rac1,S100a9,Scn1b,Cx3cl1,Serpinf1,Sgk1,Skil,Sphk1,Serpine2,Dpysl3,Pacsin1,Tnfrsf12a,Stau2,Atp8a2,Camk1,Rufy3,Golga4,Plxnc1,Dbn1,Gsk3b,Lpar3,D16Ertd472e,Bhlhb9,Smurf1,Rapgef2,Ndel1,Kdm1a,Rrn3,Baiap2,Rnf157,Akap5,Ppp1r9a
16_Member	GO Biological Processes	GO:0061564	axon development	-4.55451	74/500	Apbb2,Apoe,Rnd2,Bcl2,Ddr1,Runx3,Cxcr4,Ccr5,Cttn,Dst,Egr2,Epha2,Ephb3,Ptk2,Fgf13,Folr1,Gas1,Gata3,Hdac6,Ifrd1,Jak2,Jun,Stmn1,Lamb2,Mag,Matn2,Mmp2,Nr4a3,Nrp2,Nr4a2,Plxna1,Pmp22,Ptprm,Ptprs,Rac1,Ryk,Scn1b,Sema4c,Skil,Stxbp1,Tgfb2,Unc5c,Mgll,Tnfrsf12a,Nrep,Ulk2,Mapk8ip3,Atp8a2,Rufy3,Golga4,Plxnc1,Olfm1,Dbn1,Gsk3b,Bcl11b,Lpar3,Ttl,Flrt3,Ttc8,Stxbp5,Ndel1,Dscaml1,Usp33,Sema6d,Sipa1l1,Ablim1,Lrp4,Spg20,…
16_Member	GO Biological Processes	GO:0008361	regulation of cell size	-4.14881	37/208	Akt1,Apoe,Arhgap5,Rnd2,Atp2b2,Ccr5,Cttn,Fgf13,Ifrd1,Il7r,Kcnma1,Kcnn4,Mag,Ptprs,Rac1,Ryk,Sema4c,Slc12a2,Slc12a4,Mgll,Tnfrsf12a,Ulk2,Rufy3,Golga4,Olfm1,Plek,Dbn1,Gsk3b,Lpar3,Ttl,Ndel1,Kdm1a,Sema6d,Spg20,Lrrc8d,Lrrc8a,Iqgap3
16_Member	GO Biological Processes	GO:0048588	developmental cell growth	-4.1087	43/256	Apoe,Rnd2,Ddr1,Cxcr4,Ccr5,Col14a1,Cttn,Fgf13,Hdac6,Prmt2,Ifrd1,Igf1,Impact,Lamb2,Mag,Nrp2,Plxna1,Ptprs,Ryk,Sema4c,Sox9,Aurka,Arih2,Mgll,Eif2ak4,Tnfrsf12a,Ulk2,Fubp1,Rufy3,Golga4,Olfm1,Dbn1,Gsk3b,Lpar3,Ctdp1,Ttl,Flrt3,Smurf1,Ndel1,Kdm1a,Sema6d,Rnf157,Spg20
16_Member	GO Biological Processes	GO:0007409	axonogenesis	-3.64945	66/463	Apbb2,Apoe,Rnd2,Bcl2,Runx3,Cxcr4,Ccr5,Cttn,Dst,Egr2,Epha2,Ephb3,Ptk2,Fgf13,Gas1,Gata3,Hdac6,Ifrd1,Stmn1,Lamb2,Mag,Matn2,Nr4a3,Nrp2,Nr4a2,Plxna1,Pmp22,Ptprm,Ptprs,Rac1,Ryk,Scn1b,Sema4c,Skil,Stxbp1,Tgfb2,Unc5c,Mgll,Tnfrsf12a,Ulk2,Mapk8ip3,Atp8a2,Rufy3,Golga4,Plxnc1,Olfm1,Dbn1,Gsk3b,Bcl11b,Lpar3,Ttl,Flrt3,Ttc8,Stxbp5,Ndel1,Dscaml1,Usp33,Sema6d,Sipa1l1,Ablim1,Lrp4,Spg20,Fbxo45,Ust,Flrt2,Ccdc141
16_Member	GO Biological Processes	GO:0061387	regulation of extent of cell growth	-3.0153	23/125	Apoe,Rnd2,Ccr5,Cttn,Fgf13,Ifrd1,Mag,Ptprs,Ryk,Sema4c,Mgll,Tnfrsf12a,Ulk2,Rufy3,Golga4,Olfm1,Dbn1,Gsk3b,Lpar3,Ttl,Ndel1,Sema6d,Spg20
16_Member	GO Biological Processes	GO:1990138	neuron projection extension	-2.92333	31/190	Apoe,Ddr1,Cxcr4,Ccr5,Cttn,Ifrd1,Impact,Lamb2,Mag,Nrp2,Plxna1,Ptprs,Ryk,Sema4c,Aurka,Mgll,Eif2ak4,Tnfrsf12a,Ulk2,Rufy3,Golga4,Olfm1,Dbn1,Gsk3b,Ttl,Flrt3,Smurf1,Ndel1,Kdm1a,Sema6d,Rnf157
16_Member	GO Biological Processes	GO:0050770	regulation of axonogenesis	-2.43121	31/204	Apoe,Rnd2,Ccr5,Cttn,Ephb3,Ptk2,Fgf13,Ifrd1,Mag,Plxna1,Ptprs,Ryk,Sema4c,Skil,Mgll,Tnfrsf12a,Ulk2,Rufy3,Golga4,Plxnc1,Olfm1,Dbn1,Gsk3b,Lpar3,Ttl,Ndel1,Sema6d,Sipa1l1,Lrp4,Spg20,Ust
17_Summary	KEGG Pathway	mmu05200	Pathways in cancer	-14.7031	88/393	Adcy6,Akt1,Birc5,Axin1,Bcl2,Ccnd1,Ccne1,Cdh1,Cdk6,Cdkn1a,Cdkn2b,Cxcr4,Col4a1,Col4a2,Ctbp1,Dapk2,Dapk3,Dvl3,Ednra,Ednrb,Ptk2,Fasl,Fgf1,Fgf13,Fgfr1,Flt3,Fos,Fzd5,Fzd7,Gna12,Gnaq,Gnb1,Gnb4,Lpar1,Grb2,Hif1a,Hras,Igf1,Il6,Itga6,Jun,Jup,Kit,Kras,Lama4,Lamb2,Lamb3,Lef1,Mdm2,Kitl,Mmp2,Myc,Nfkbia,Pdgfa,Pdgfb,Prkaca,Prkcb,Plcg1,Pparg,Ptger4,Ptgs2,Rac1,Rad51,Rasgrp1,Rela,Ralgds,Rock2,Tcf7,Tcf7l2,Tgfa,Tgfb2,…
17_Member	KEGG Pathway	mmu05200	Pathways in cancer	-14.7031	88/393	Adcy6,Akt1,Birc5,Axin1,Bcl2,Ccnd1,Ccne1,Cdh1,Cdk6,Cdkn1a,Cdkn2b,Cxcr4,Col4a1,Col4a2,Ctbp1,Dapk2,Dapk3,Dvl3,Ednra,Ednrb,Ptk2,Fasl,Fgf1,Fgf13,Fgfr1,Flt3,Fos,Fzd5,Fzd7,Gna12,Gnaq,Gnb1,Gnb4,Lpar1,Grb2,Hif1a,Hras,Igf1,Il6,Itga6,Jun,Jup,Kit,Kras,Lama4,Lamb2,Lamb3,Lef1,Mdm2,Kitl,Mmp2,Myc,Nfkbia,Pdgfa,Pdgfb,Prkaca,Prkcb,Plcg1,Pparg,Ptger4,Ptgs2,Rac1,Rad51,Rasgrp1,Rela,Ralgds,Rock2,Tcf7,Tcf7l2,Tgfa,Tgfb2,…
17_Member	KEGG Pathway	mmu04151	PI3K-Akt signaling pathway	-7.34037	64/346	Angpt2,Akt1,Bcl2,Ccnd1,Ccnd2,Ccne1,Cdk6,Cdkn1a,Col4a1,Col4a2,Col6a3,Csf1,Epha2,Ptk2,Fasl,Fgf1,Fgf13,Fgfr1,Gnb1,Gnb4,Lpar1,Grb2,Nr4a1,Hras,Igf1,Il2ra,Il4ra,Il6,Il7r,Itga6,Itgb5,Jak2,Kdr,Kit,Kras,Lama4,Lamb2,Lamb3,Mcl1,Mdm2,Kitl,Myb,Myc,Osm,Pdgfa,Pdgfb,Ppp2ca,Rac1,Rela,Sgk1,Spp1,Thbs1,Thbs2,Vegfb,Ywhah,Tlr2,Creb3l1,Ppp2r2d,Gsk3b,Lpar3,Lpar4,Pik3ap1,Itga9,Pkn1
17_Member	KEGG Pathway	mmu04510	Focal adhesion	-5.34758	39/199	Akt1,Arhgap5,Bcl2,Cav1,Ccnd1,Ccnd2,Col4a1,Col4a2,Col6a3,Bcar1,Ptk2,Fyn,Grb2,Hras,Igf1,Itga6,Itgb5,Jun,Kdr,Lama4,Lamb2,Lamb3,Pdgfa,Pdgfb,Prkcb,Rac1,Rock2,Spp1,Thbs1,Thbs2,Vav2,Vegfb,Gsk3b,Vav3,Parva,Parvg,Itga9,Rac3,Ppp1r12c
17_Member	KEGG Pathway	mmu05222	Small cell lung cancer	-4.32235	20/83	Akt1,Bcl2,Ccnd1,Ccne1,Cdk6,Cdkn2b,Col4a1,Col4a2,Ptk2,Itga6,Lama4,Lamb2,Lamb3,Myc,Nfkbia,Ptgs2,Rela,Traf1,Traf4,Cks1b
18_Summary	GO Biological Processes	GO:0048729	tissue morphogenesis	-14.672	127/673	Adam8,Areg,Axin1,Bcl2,Bmpr1a,Ddr1,Runx3,Cdh1,Celsr1,Socs3,Cxcr4,Col14a1,Col4a1,Col6a3,Csf1,Ctsd,Ctsl,Dab2,Dvl3,S1pr1,Ednra,Eomes,Epha2,Eya1,Fgf1,Fgfr1,Folr1,Fzd5,Gata3,Gcnt1,B4galt1,Gja1,Pdpn,Gpc3,Grb2,Hbegf,Hes1,Hif1a,Cxcl10,Igf1,Ccn1,Il10,Il6,Inhba,Jag1,Jag2,Kdr,Kras,Lef1,Lif,Smad7,Matn2,Mdm2,Mmp12,Mmp14,Mmp2,Cited2,Msx1,Myc,Ncoa3,Nr4a3,Notch4,Nrp2,Pdgfa,Pdgfb,Prkaca,Plxna1,Med1,St14,Rac1,Aldh1…
18_Member	GO Biological Processes	GO:0048729	tissue morphogenesis	-14.672	127/673	Adam8,Areg,Axin1,Bcl2,Bmpr1a,Ddr1,Runx3,Cdh1,Celsr1,Socs3,Cxcr4,Col14a1,Col4a1,Col6a3,Csf1,Ctsd,Ctsl,Dab2,Dvl3,S1pr1,Ednra,Eomes,Epha2,Eya1,Fgf1,Fgfr1,Folr1,Fzd5,Gata3,Gcnt1,B4galt1,Gja1,Pdpn,Gpc3,Grb2,Hbegf,Hes1,Hif1a,Cxcl10,Igf1,Ccn1,Il10,Il6,Inhba,Jag1,Jag2,Kdr,Kras,Lef1,Lif,Smad7,Matn2,Mdm2,Mmp12,Mmp14,Mmp2,Cited2,Msx1,Myc,Ncoa3,Nr4a3,Notch4,Nrp2,Pdgfa,Pdgfb,Prkaca,Plxna1,Med1,St14,Rac1,Aldh1…
18_Member	GO Biological Processes	GO:0002009	morphogenesis of an epithelium	-12.2549	104/548	Areg,Bcl2,Ddr1,Runx3,Cdh1,Celsr1,Socs3,Cxcr4,Col4a1,Csf1,Ctsd,Ctsl,Dab2,Dvl3,Ednra,Epha2,Eya1,Fgf1,Fgfr1,Folr1,Fzd5,Gata3,B4galt1,Gja1,Pdpn,Gpc3,Grb2,Hbegf,Hes1,Hif1a,Cxcl10,Igf1,Ccn1,Il10,Il6,Jag1,Jag2,Kdr,Kras,Lef1,Lif,Mmp12,Mmp14,Mmp2,Cited2,Myc,Ncoa3,Notch4,Pdgfa,Pdgfb,Prkaca,Plxna1,Med1,St14,Rac1,Aldh1a2,Rock2,Ryk,Sema4c,Stil,Slc12a2,Snai1,Sox4,Sox9,Spint1,Spint2,Sdc4,Tgfb2,Tgif1,Tgm2,Tnf,Vd…
18_Member	GO Biological Processes	GO:0001763	morphogenesis of a branching structure	-11.0918	58/243	Areg,Bcl2,Prdm1,Ddr1,Cdh1,Celsr1,Socs3,Cxcr4,Col4a1,Cpe,Csf1,Ctsd,Ctsl,Ednra,Epha2,Eya1,Fgf1,Fgfr1,Fzd5,B4galt1,Gpc3,Grb2,Igf1,Il10,Il1b,Il6,Kdr,Kras,Lef1,Mmp14,Cited2,Myc,Ncoa3,Notch4,Ctnnd2,Pdgfa,Pdgfb,Plxna1,Med1,St14,Slc12a2,Sox9,Spint1,Spint2,Tgm2,Tnf,Vdr,Spry1,Spry2,Clic4,Dll4,Ntn4,Sall1,Maged1,Etv5,Npnt,Rbm15,Adamts16
18_Member	GO Biological Processes	GO:0061138	morphogenesis of a branching epithelium	-10.5506	54/224	Areg,Bcl2,Ddr1,Cdh1,Celsr1,Socs3,Cxcr4,Col4a1,Csf1,Ctsd,Ctsl,Ednra,Epha2,Eya1,Fgf1,Fgfr1,Fzd5,B4galt1,Gpc3,Grb2,Igf1,Il10,Il6,Kdr,Kras,Lef1,Mmp14,Cited2,Myc,Ncoa3,Notch4,Pdgfa,Pdgfb,Plxna1,Med1,St14,Slc12a2,Sox9,Spint1,Spint2,Tgm2,Tnf,Vdr,Spry1,Spry2,Clic4,Dll4,Ntn4,Sall1,Maged1,Etv5,Npnt,Rbm15,Adamts16
18_Member	GO Biological Processes	GO:2000027	regulation of animal organ morphogenesis	-8.29241	47/208	Bcl2,Bmpr1a,Cd34,Cdh1,Celsr1,Csf1,Dab2,Dvl3,Ednra,Eya1,Fgf1,Fgfr1,Gata3,B4galt1,Gpc3,Hes1,Ifng,Jag1,Lif,Cited2,Msx1,Myc,Pdgfa,Pim1,Plau,Por,Med1,Ptn,Rac1,Ryk,Sox9,Tgfb2,Tgfb3,Tnf,Tnfaip3,Vdr,Wnt11,Spry1,Ntn4,Sall1,Carm1,Dact1,Sapcd2,Maged1,Etv5,Ankrd6,Znrf3
18_Member	GO Biological Processes	GO:0060562	epithelial tube morphogenesis	-6.5331	66/379	Areg,Bcl2,Ddr1,Celsr1,Cxcr4,Col4a1,Csf1,Ctsd,Ctsl,Dvl3,Ednra,Epha2,Eya1,Fgf1,Folr1,Gata3,B4galt1,Gja1,Gpc3,Hes1,Hif1a,Cxcl10,Igf1,Kdr,Kras,Lef1,Mmp14,Cited2,Myc,Ncoa3,Notch4,Prkaca,Med1,St14,Aldh1a2,Rock2,Sema4c,Stil,Slc12a2,Sox4,Sox9,Spint1,Spint2,Sdc4,Tgfb2,Tgif1,Tnf,Vdr,Spry1,Spry2,Map3k7,Clic4,Dll4,Sall1,Sostdc1,Maged1,Bbs4,Etv5,Prickle1,Npnt,Rbm15,Kif20b,Stard13,Luzp1,Adamts16,Klhl3
18_Member	GO Biological Processes	GO:0048754	branching morphogenesis of an epithelial tube	-6.04481	39/187	Areg,Bcl2,Ddr1,Celsr1,Cxcr4,Col4a1,Csf1,Ctsd,Ctsl,Ednra,Epha2,Eya1,Fgf1,B4galt1,Gpc3,Igf1,Kdr,Kras,Lef1,Mmp14,Cited2,Myc,Ncoa3,Notch4,Med1,Slc12a2,Sox9,Tnf,Vdr,Spry1,Spry2,Clic4,Dll4,Sall1,Maged1,Etv5,Npnt,Rbm15,Adamts16
18_Member	GO Biological Processes	GO:1905330	regulation of morphogenesis of an epithelium	-4.69861	25/111	Cdh1,Celsr1,Dab2,Dvl3,Fgf1,Fgfr1,Gata3,Gpc3,Cxcl10,Lif,Pdgfa,Rac1,Ryk,Sox9,Tnf,Wnt11,Ntn4,Sall1,Dact1,Sapcd2,Maged1,Etv5,Ankrd6,Phldb2,Znrf3
18_Member	GO Biological Processes	GO:0072001	renal system development	-4.1593	49/303	Adamts1,Angpt2,Arg2,Bcl2,C3ar1,Col4a1,Ednra,Egr1,Eya1,Fgf1,Fgfr1,Gata3,Gcnt1,Gpc3,Hes1,Id3,Ifng,Itga6,Jag1,Lamb2,Lif,Epcam,Smad6,Smad7,Cited2,Myc,Pdgfa,Pdgfb,Prom1,Aldh1a2,Sox4,Sox9,Stra6,Tgfb2,Wnt11,Spry1,Sall1,Basp1,Myo1e,Cep55,Ttc8,Maged1,Tiparp,Jmjd6,Cenpf,Npnt,Lrp4,Adamts16,Klhl3
18_Member	GO Biological Processes	GO:0001655	urogenital system development	-4.05865	54/347	Adamts1,Angpt2,Arg2,Bcl2,C3ar1,Col4a1,Ednra,Egr1,Ephb3,Eya1,Fgf1,Fgfr1,Gata3,Gcnt1,Gpc3,Hes1,Id3,Ifng,Igf1,Itga6,Jag1,Lamb2,Lif,Epcam,Smad6,Smad7,Mmp2,Cited2,Myc,Pdgfa,Pdgfb,Plaur,Prom1,Aldh1a2,Serpinf1,Sox4,Sox9,Stra6,Tgfb2,Wnt11,Spry1,Sall1,Basp1,Myo1e,Cep55,Ttc8,Maged1,Tiparp,Jmjd6,Cenpf,Npnt,Lrp4,Adamts16,Klhl3
18_Member	GO Biological Processes	GO:0072073	kidney epithelium development	-3.57149	27/144	Arg2,Bcl2,Eya1,Fgf1,Fgfr1,Gata3,Gpc3,Hes1,Jag1,Lamb2,Lif,Epcam,Smad6,Smad7,Cited2,Myc,Pdgfb,Prom1,Sox9,Spry1,Sall1,Basp1,Myo1e,Maged1,Npnt,Adamts16,Klhl3
18_Member	GO Biological Processes	GO:0001822	kidney development	-3.44921	44/282	Adamts1,Angpt2,Arg2,Bcl2,C3ar1,Ednra,Egr1,Eya1,Fgf1,Fgfr1,Gata3,Gcnt1,Gpc3,Hes1,Id3,Ifng,Jag1,Lamb2,Lif,Epcam,Smad6,Smad7,Cited2,Myc,Pdgfa,Pdgfb,Prom1,Sox4,Sox9,Stra6,Tgfb2,Wnt11,Spry1,Sall1,Basp1,Myo1e,Maged1,Tiparp,Jmjd6,Cenpf,Npnt,Lrp4,Adamts16,Klhl3
18_Member	GO Biological Processes	GO:0110110	positive regulation of animal organ morphogenesis	-3.22153	20/99	Cd34,Csf1,Ednra,Fgf1,Fgfr1,Gata3,B4galt1,Jag1,Lif,Myc,Pim1,Med1,Ptn,Sox9,Tgfb2,Tnfaip3,Vdr,Spry1,Sall1,Maged1
18_Member	GO Biological Processes	GO:0072009	nephron epithelium development	-3.01517	21/110	Bcl2,Eya1,Fgf1,Gata3,Gpc3,Hes1,Jag1,Lamb2,Lif,Cited2,Myc,Pdgfb,Prom1,Sox9,Sall1,Basp1,Myo1e,Maged1,Npnt,Adamts16,Klhl3
18_Member	GO Biological Processes	GO:0072006	nephron development	-2.72062	25/147	Angpt2,Bcl2,C3ar1,Egr1,Eya1,Fgf1,Gata3,Gpc3,Hes1,Ifng,Jag1,Lamb2,Lif,Cited2,Myc,Pdgfb,Prom1,Sox9,Sall1,Basp1,Myo1e,Maged1,Npnt,Adamts16,Klhl3
18_Member	GO Biological Processes	GO:0061326	renal tubule development	-2.45876	19/106	Bcl2,Col4a1,Eya1,Fgf1,Gata3,Gpc3,Hes1,Jag1,Lif,Cited2,Myc,Prom1,Sox9,Sall1,Ttc8,Maged1,Npnt,Adamts16,Klhl3
18_Member	GO Biological Processes	GO:0072164	mesonephric tubule development	-2.45876	19/106	Arg2,Bcl2,Eya1,Fgf1,Fgfr1,Gata3,Gpc3,Hes1,Epcam,Smad6,Smad7,Cited2,Myc,Sox9,Spry1,Sall1,Maged1,Npnt,Adamts16
18_Member	GO Biological Processes	GO:0072163	mesonephric epithelium development	-2.45876	19/106	Arg2,Bcl2,Eya1,Fgf1,Fgfr1,Gata3,Gpc3,Hes1,Epcam,Smad6,Smad7,Cited2,Myc,Sox9,Spry1,Sall1,Maged1,Npnt,Adamts16
18_Member	GO Biological Processes	GO:0001657	ureteric bud development	-2.45876	19/106	Arg2,Bcl2,Eya1,Fgf1,Fgfr1,Gata3,Gpc3,Hes1,Epcam,Smad6,Smad7,Cited2,Myc,Sox9,Spry1,Sall1,Maged1,Npnt,Adamts16
18_Member	GO Biological Processes	GO:0001823	mesonephros development	-2.32115	19/109	Arg2,Bcl2,Eya1,Fgf1,Fgfr1,Gata3,Gpc3,Hes1,Epcam,Smad6,Smad7,Cited2,Myc,Sox9,Spry1,Sall1,Maged1,Npnt,Adamts16
18_Member	GO Biological Processes	GO:0072088	nephron epithelium morphogenesis	-2.08737	15/83	Bcl2,Eya1,Fgf1,Gata3,Gpc3,Hes1,Lif,Cited2,Myc,Sox9,Sall1,Maged1,Npnt,Adamts16,Klhl3
19_Summary	GO Biological Processes	GO:0045596	negative regulation of cell differentiation	-13.8345	140/790	Abcg1,Adcy6,Apoe,Areg,Arf6,Axin1,Bcl2,Bmpr1a,Zfp36l1,C1qc,Capn3,Cav1,Runx3,Ccnd1,Noct,Ctla4,Cd38,Cdk6,Cdkn2b,Cit,Ccr5,Bcar1,Dab2,Ddit3,Ednrb,Ezh2,Ptk2,Fbln1,Fgf13,Fgfr1,Flt3,Fzd7,Gata3,Gfap,Gfi1,Lpar1,Adgrg1,Hes1,Hmgb3,Id3,Cxcl10,Ifng,Ifrd1,Igf1,Cd74,Il1a,Il1b,Il4ra,Jag1,Kras,Mafb,Ldb1,Loxl3,Ltbp3,Smad6,Smad7,Mag,Mdm2,Mmp11,Msx1,Mt3,Myc,Ncoa3,Nfkbia,Notch4,Pdgfb,Enpp1,Pmp22,Med1,Pparg,Ppp2ca,Ptn,…
19_Member	GO Biological Processes	GO:0045596	negative regulation of cell differentiation	-13.8345	140/790	Abcg1,Adcy6,Apoe,Areg,Arf6,Axin1,Bcl2,Bmpr1a,Zfp36l1,C1qc,Capn3,Cav1,Runx3,Ccnd1,Noct,Ctla4,Cd38,Cdk6,Cdkn2b,Cit,Ccr5,Bcar1,Dab2,Ddit3,Ednrb,Ezh2,Ptk2,Fbln1,Fgf13,Fgfr1,Flt3,Fzd7,Gata3,Gfap,Gfi1,Lpar1,Adgrg1,Hes1,Hmgb3,Id3,Cxcl10,Ifng,Ifrd1,Igf1,Cd74,Il1a,Il1b,Il4ra,Jag1,Kras,Mafb,Ldb1,Loxl3,Ltbp3,Smad6,Smad7,Mag,Mdm2,Mmp11,Msx1,Mt3,Myc,Ncoa3,Nfkbia,Notch4,Pdgfb,Enpp1,Pmp22,Med1,Pparg,Ppp2ca,Ptn,…
19_Member	GO Biological Processes	GO:0051129	negative regulation of cellular component organization	-12.1559	129/742	Adcy6,Avil,Akt1,Birc5,Apod,Apoe,Arf6,Bub1,Bub1b,Cav1,Ccnf,Cd38,Chek1,Cit,Ccr5,Bcar1,Ctbp1,Dab2,Dpp4,S1pr1,Ptk2,Fbln1,Fgf13,Fyn,Gfap,Gfi1,Lpar1,Hdac6,Hes1,Ier3,Cxcl10,Ifrd1,Igf1,Impact,Stmn1,Lif,Lmna,Smad6,Mag,Mcm2,Mdm2,Mmp14,Nek2,Osm,Pecam1,Per2,Plk1,Pmp22,Prnp,Ptger4,Ptn,Ptprs,Rock2,Rps6ka2,Ryk,Atxn2,Scin,Sema4c,Sgk1,Plk2,Stxbp1,Tnf,Top2a,Ttc3,Ttk,Tubb4a,Dpysl3,Nr1h3,Xrcc5,Ywhah,Pacsin1,Spry2,Tl…
19_Member	GO Biological Processes	GO:0010977	negative regulation of neuron projection development	-6.89909	39/174	Adcy6,Apoe,Arf6,Cd38,Cit,Ccr5,Dab2,Ptk2,Fgf13,Gfap,Gfi1,Lpar1,Hes1,Ifrd1,Mag,Mdm2,Pmp22,Ptprs,Ryk,Sema4c,Plk2,Dpysl3,Ywhah,Ulk2,Rufy3,Gsk3b,Carm1,Rapgef2,Dtnbp1,Kank1,Cspg4,Sema6d,Mylip,Lrp4,Spg20,Rtn4rl1,Prag1,Klk8,Fat3
19_Member	GO Biological Processes	GO:0031345	negative regulation of cell projection organization	-6.2986	42/204	Adcy6,Apoe,Arf6,Cd38,Cit,Ccr5,Dab2,Ptk2,Fgf13,Fyn,Gfap,Gfi1,Lpar1,Hes1,Ifrd1,Mag,Mdm2,Pmp22,Prnp,Ptprs,Ryk,Sema4c,Plk2,Dpysl3,Ywhah,Spry2,Ulk2,Rufy3,Gsk3b,Carm1,Rapgef2,Dtnbp1,Kank1,Cspg4,Sema6d,Mylip,Lrp4,Spg20,Rtn4rl1,Prag1,Klk8,Fat3
19_Member	GO Biological Processes	GO:0045665	negative regulation of neuron differentiation	-5.69738	48/259	Adcy6,Apoe,Arf6,Cav1,Cd38,Cit,Ccr5,Dab2,Ednrb,Ptk2,Fgf13,Gfap,Gfi1,Lpar1,Hes1,Id3,Ifrd1,Il1b,Jag1,Mag,Mdm2,Pmp22,Med1,Ptprs,Ryk,Sema4c,Plk2,Sox9,Ttc3,Dpysl3,Ywhah,Eif2ak4,Ulk2,Rufy3,Gsk3b,Carm1,Rapgef2,Dtnbp1,Kank1,Cspg4,Sema6d,Mylip,Lrp4,Spg20,Rtn4rl1,Prag1,Klk8,Fat3
19_Member	GO Biological Processes	GO:0051961	negative regulation of nervous system development	-5.52328	60/356	Adcy6,Apoe,Arf6,Bmpr1a,Cav1,Cd38,Cdkn2b,Cit,Ccr5,Cpe,Dab2,Ednrb,Ptk2,Fgf13,Gfap,Gfi1,Lpar1,Adgrg1,Hes1,Id3,Ifng,Ifrd1,Il1b,Jag1,Mag,Mdm2,Mt3,Prkaca,Pmp22,Med1,Ptn,Ptprs,Ryk,Sema4c,Plk2,Sox9,Tnf,Ttc3,Dpysl3,Ywhah,Tlr2,Eif2ak4,Ulk2,Rufy3,Olfm1,Gsk3b,Carm1,Rapgef2,Dtnbp1,Kdm1a,Kank1,Cspg4,Sema6d,Mylip,Lrp4,Spg20,Rtn4rl1,Prag1,Klk8,Fat3
19_Member	GO Biological Processes	GO:0010721	negative regulation of cell development	-5.14167	62/382	Adcy6,Apoe,Arf6,Bcl2,Bmpr1a,Cav1,Cd38,Cdkn2b,Cit,Ccr5,Bcar1,Dab2,Ednrb,Ptk2,Fbln1,Fgf13,Gfap,Gfi1,Lpar1,Adgrg1,Hes1,Id3,Ifrd1,Igf1,Il1a,Il1b,Jag1,Mag,Mdm2,Mt3,Pmp22,Med1,Ptn,Ptprs,Ryk,Sema4c,Plk2,Sox9,Ttc3,Dpysl3,Ywhah,Eif2ak4,Ulk2,Rufy3,Olfm1,Gsk3b,Carm1,Ctdp1,Rapgef2,Dtnbp1,Kdm1a,Kank1,Rcc2,Cspg4,Sema6d,Mylip,Lrp4,Spg20,Rtn4rl1,Prag1,Klk8,Fat3
19_Member	GO Biological Processes	GO:0050768	negative regulation of neurogenesis	-4.85596	55/333	Adcy6,Apoe,Arf6,Bmpr1a,Cav1,Cd38,Cdkn2b,Cit,Ccr5,Dab2,Ednrb,Ptk2,Fgf13,Gfap,Gfi1,Lpar1,Adgrg1,Hes1,Id3,Ifrd1,Il1b,Jag1,Mag,Mdm2,Mt3,Pmp22,Med1,Ptn,Ptprs,Ryk,Sema4c,Plk2,Sox9,Ttc3,Dpysl3,Ywhah,Eif2ak4,Ulk2,Rufy3,Olfm1,Gsk3b,Carm1,Rapgef2,Dtnbp1,Kdm1a,Kank1,Cspg4,Sema6d,Mylip,Lrp4,Spg20,Rtn4rl1,Prag1,Klk8,Fat3
20_Summary	KEGG Pathway	mmu04658	Th1 and Th2 cell differentiation	-13.2519	34/87	Runx3,Cd3d,Cd3g,Cd247,Fos,Gata3,H2-Aa,H2-Ab1,H2-Eb1,H2-DMb1,H2-DMb2,H2-Oa,H2-Ob,Ifng,Il12b,Il12rb1,Il2ra,Il4ra,Jag1,Jag2,Jak2,Jun,Lat,Lck,Nfkbia,Prkcq,Plcg1,Ppp3cc,Rela,Stat4,Zap70,Dll4,Tbx21,Maml2,Cd14,Cd22,Cd34,Cd36,Cd38,Cd5,Cd7,Cd8a,Cd8b1,Cd9,Csf1,Flt3,Il1a,Il1b,Il1r2,Il6,Il7r,Itga6,Kit,Anpep,Kitl,Tnf,Tfrc,Siglech,Il10,Il18rap,Il18r1,Tgfb2,Tgfb3,Tlr2,Tlr5,Il21r,Acp5,Ctla4,Cd28,Cd80,Cd86,Ctsk,C…
20_Member	KEGG Pathway	mmu04658	Th1 and Th2 cell differentiation	-13.2519	34/87	Runx3,Cd3d,Cd3g,Cd247,Fos,Gata3,H2-Aa,H2-Ab1,H2-Eb1,H2-DMb1,H2-DMb2,H2-Oa,H2-Ob,Ifng,Il12b,Il12rb1,Il2ra,Il4ra,Jag1,Jag2,Jak2,Jun,Lat,Lck,Nfkbia,Prkcq,Plcg1,Ppp3cc,Rela,Stat4,Zap70,Dll4,Tbx21,Maml2
20_Member	KEGG Pathway	mmu04640	Hematopoietic cell lineage	-12.7186	35/95	Cd14,Cd22,Cd34,Cd36,Cd38,Cd3d,Cd3g,Cd5,Cd7,Cd8a,Cd8b1,Cd9,Csf1,Flt3,H2-Aa,H2-Ab1,H2-Eb1,H2-DMb1,H2-DMb2,H2-Oa,H2-Ob,Il1a,Il1b,Il1r2,Il2ra,Il4ra,Il6,Il7r,Itga6,Kit,Anpep,Kitl,Tnf,Tfrc,Siglech
20_Member	KEGG Pathway	mmu05321	Inflammatory bowel disease (IBD)	-12.6462	27/59	H2-Aa,H2-Ab1,H2-Eb1,H2-DMb1,H2-DMb2,H2-Oa,H2-Ob,Ifng,Il10,Il12b,Il12rb1,Il18rap,Il1a,Il1b,Il18r1,Il4ra,Il6,Jun,Rela,Stat4,Tgfb2,Tgfb3,Tnf,Tlr2,Tlr5,Tbx21,Il21r
20_Member	KEGG Pathway	mmu05323	Rheumatoid arthritis	-12.3205	32/83	Acp5,Ctla4,Cd28,Cd80,Cd86,Csf1,Ctsk,Ctsl,Fos,H2-Aa,H2-Ab1,H2-Eb1,H2-DMb1,H2-DMb2,H2-Oa,H2-Ob,Ifng,Il1a,Il1b,Il6,Jun,Ccl12,Ccl2,Ccl3,Ccl5,Tgfb2,Tgfb3,Tnf,Tnfrsf11a,Tlr2,Atp6v1c1,Atp6v0d2
20_Member	KEGG Pathway	mmu05152	Tuberculosis	-9.62526	45/178	Akt1,Bcl2,Ciita,Cd14,Cebpb,Plk3,Camp,Ctsd,H2-Aa,H2-Ab1,H2-Eb1,H2-DMb1,H2-DMb2,H2-Oa,H2-Ob,Ifng,Cd74,Il10,Il10rb,Il12b,Il1a,Il1b,Il6,Itgax,Jak2,Lamp1,Mrc1,Mrc2,Ppp3cc,Rela,Sphk1,Tgfb2,Tgfb3,Tnf,Vdr,Tlr2,Rfx5,Clec4e,Cd209f,Irak2,Cd209c,Cd209d,Cd209e,Cd209a,Atp6v0d2
20_Member	KEGG Pathway	mmu04659	Th17 cell differentiation	-9.57657	32/102	Cd3d,Cd3g,Cd247,Fos,Gata3,H2-Aa,H2-Ab1,H2-Eb1,H2-DMb1,H2-DMb2,H2-Oa,H2-Ob,Hif1a,Ifng,Il12rb1,Il1b,Il2ra,Il4ra,Il6,Jak2,Jun,Lat,Lck,Nfkbia,Prkcq,Plcg1,Ppp3cc,Rela,Zap70,Il27ra,Tbx21,Il21r
20_Member	KEGG Pathway	mmu05140	Leishmaniasis	-8.79985	24/66	Fos,H2-Aa,H2-Ab1,H2-Eb1,H2-DMb1,H2-DMb2,H2-Oa,H2-Ob,Ifng,Il10,Il12b,Il1a,Il1b,Jak2,Jun,Nfkbia,Prkcb,Ptgs2,Rela,Tgfb2,Tgfb3,Tnf,Tlr2,Map3k7
20_Member	KEGG Pathway	mmu05145	Toxoplasmosis	-6.49126	28/108	Akt1,Bcl2,Ciita,Ccr5,H2-Aa,H2-Ab1,H2-Eb1,H2-DMb1,H2-DMb2,H2-Oa,H2-Ob,Ifng,Il10,Il10rb,Il12b,Itga6,Jak2,Lama4,Lamb2,Lamb3,Nfkbia,Rela,Tgfb2,Tgfb3,Tnf,Tlr2,Map3k7,Hspa1a
20_Member	KEGG Pathway	mmu05332	Graft-versus-host disease	-6.08265	20/65	Cd28,Cd80,Cd86,Fasl,H2-Aa,H2-Ab1,H2-Eb1,H2-M2,H2-DMb1,H2-DMb2,H2-Oa,H2-Ob,H2-Q7,Ifng,Il1a,Il1b,Il6,Klrd1,Tnf,H2-Q6
20_Member	KEGG Pathway	mmu05168	Herpes simplex infection	-5.66961	42/215	Cdk1,Socs3,Fasl,Fos,H2-Aa,H2-Ab1,H2-Eb1,H2-M2,H2-DMb1,H2-DMb2,H2-Oa,H2-Ob,H2-Q7,Hmgn1,Ifng,Cd74,Il12b,Il1b,Il6,Jak2,Jun,Nfkbia,Per2,Nectin2,Rela,Ccl12,Ccl2,Ccl5,Srsf2,Srpk1,Alyref,Tnf,Traf1,Tlr2,Map3k7,Eif2ak4,Gtf2ird1,Taf4b,Srsf9,H2-Q6,Tlr3,Taf5
20_Member	KEGG Pathway	mmu04940	Type I diabetes mellitus	-5.52068	20/70	Cd28,Cd80,Cd86,Cpe,Fasl,H2-Aa,H2-Ab1,H2-Eb1,H2-M2,H2-DMb1,H2-DMb2,H2-Oa,H2-Ob,H2-Q7,Ifng,Il12b,Il1a,Il1b,Tnf,H2-Q6
20_Member	GO Biological Processes	GO:0002504	antigen processing and presentation of peptide or polysaccharide antigen via MHC class II	-5.48386	10/20	H2-Aa,H2-Ab1,H2-Eb1,H2-DMb1,H2-DMb2,H2-Oa,H2-Ob,Cd74,Thbs1,Trem2
20_Member	KEGG Pathway	mmu04672	Intestinal immune network for IgA production	-5.47165	15/43	Cd28,Cd80,Cd86,Cxcr4,H2-Aa,H2-Ab1,H2-Eb1,H2-DMb1,H2-DMb2,H2-Oa,H2-Ob,Il10,Il6,Icosl,Icos
20_Member	KEGG Pathway	mmu04612	Antigen processing and presentation	-5.24712	23/91	Ciita,Cd8a,Cd8b1,Ctsb,Ctsl,Hspa5,H2-Aa,H2-Ab1,H2-Eb1,H2-M2,H2-DMb1,H2-DMb2,H2-Oa,H2-Ob,H2-Q7,Ifng,Cd74,Klrd1,Lgmn,Tnf,Rfx5,H2-Q6,Hspa1a
20_Member	KEGG Pathway	mmu05330	Allograft rejection	-4.92616	18/64	Cd28,Cd80,Cd86,Fasl,H2-Aa,H2-Ab1,H2-Eb1,H2-M2,H2-DMb1,H2-DMb2,H2-Oa,H2-Ob,H2-Q7,Ifng,Il10,Il12b,Tnf,H2-Q6
20_Member	GO Biological Processes	GO:0002495	antigen processing and presentation of peptide antigen via MHC class II	-4.74246	9/19	H2-Aa,H2-Ab1,H2-Eb1,H2-DMb1,H2-DMb2,H2-Oa,H2-Ob,Cd74,Trem2
20_Member	KEGG Pathway	mmu05164	Influenza A	-4.64752	33/168	Akt1,Ciita,Socs3,Fasl,H2-Aa,H2-Ab1,H2-Eb1,H2-DMb1,H2-DMb2,H2-Oa,H2-Ob,Agfg1,Cxcl10,Ifng,Il12b,Il1a,Il1b,Il6,Jak2,Jun,Nfkbia,Prkcb,Rela,Ccl12,Ccl2,Ccl5,Tnf,Eif2ak4,Gsk3b,Ivns1abp,Tlr3,Hspa1a,Nup98
20_Member	KEGG Pathway	mmu05310	Asthma	-4.42282	10/25	H2-Aa,H2-Ab1,H2-Eb1,H2-DMb1,H2-DMb2,H2-Oa,H2-Ob,Il10,Prg2,Tnf
20_Member	KEGG Pathway	mmu05150	Staphylococcus aureus infection	-4.34583	15/52	C1qa,C1qb,C1qc,C3ar1,C4b,C5ar1,H2-Aa,H2-Ab1,H2-Eb1,H2-DMb1,H2-DMb2,H2-Oa,H2-Ob,Il10,Ptafr
20_Member	KEGG Pathway	mmu04145	Phagosome	-4.20101	34/184	Cd14,Cd36,Ctsl,H2-Aa,H2-Ab1,H2-Eb1,H2-M2,H2-DMb1,H2-DMb2,H2-Oa,H2-Ob,H2-Q7,Itgb5,Lamp1,Mpo,Mrc1,Mrc2,Rac1,Thbs1,Thbs2,Tfrc,Tubb4a,Tubb5,Tlr2,Atp6v1c1,Cd209f,Olr1,H2-Q6,Cd209c,Cd209d,Cd209e,Cd209a,Rab7b,Atp6v0d2
20_Member	GO Biological Processes	GO:0019886	antigen processing and presentation of exogenous peptide antigen via MHC class II	-3.97743	7/14	H2-Aa,H2-Ab1,H2-Eb1,H2-DMb1,H2-DMb2,H2-Oa,Cd74
20_Member	KEGG Pathway	mmu05416	Viral myocarditis	-3.94111	20/88	Cav1,Ccnd1,Cd28,Cd80,Cd86,Cxadr,Fyn,H2-Aa,H2-Ab1,H2-Eb1,H2-M2,H2-DMb1,H2-DMb2,H2-Oa,H2-Ob,H2-Q7,Rac1,Sgcb,H2-Q6,Rac3
20_Member	Reactome Gene Sets	R-MMU-2132295	MHC class II antigen presentation	-3.21836	23/121	Ctsb,Ctsd,Ctsk,Ctsl,H2-Aa,H2-Ab1,H2-Eb1,H2-DMb1,H2-DMb2,H2-Oa,H2-Ob,Cd74,Kif11,Kif4,Lag3,Kif20a,Tubb4a,Ctsf,Osbpl1a,Dynll2,Kif2c,Kif22,Cenpe
20_Member	KEGG Pathway	mmu05320	Autoimmune thyroid disease	-2.70352	16/79	Ctla4,Cd28,Cd80,Cd86,Fasl,H2-Aa,H2-Ab1,H2-Eb1,H2-M2,H2-DMb1,H2-DMb2,H2-Oa,H2-Ob,H2-Q7,Il10,H2-Q6
20_Member	GO Biological Processes	GO:0002478	antigen processing and presentation of exogenous peptide antigen	-2.22298	7/25	H2-Aa,H2-Ab1,H2-Eb1,H2-DMb1,H2-DMb2,H2-Oa,Cd74
